# Supplementary material for: In Silico Analysis of Fungal and Chloride-Dependent α-Amylases within the Family GH13 with Identification of Possible Secondary Surface-Binding Sites
Source: MDPI journal article supplement (doi:10.3390/molecules26185704), 2021-09-21
Supplement: s1 [file s1]

# In Silico Analysis of Fungal and Chloride-Dependent $\alpha$ -Amylases within the Family GH13 with Identification of Possible Secondary Surface-Binding Sites

**Zuzana Janíčková <sup>1,2</sup> and Štefan Janeček <sup>1,2,\*</sup>**

- <sup>1</sup> Department of Biology, Faculty of Natural Sciences, University of SS. Cyril and Methodius, SK-91701 Trnava, Slovakia
- <sup>2</sup> Laboratory of Protein Evolution, Institute of Molecular Biology, Slovak Academy of Sciences, SK-84551 Bratislava, Slovakia

1 AAB95446 *Pennicillium polymyxa*  
2 CA819465 *Thermactinomyces vulgaris*  
3 BAD06003 *Aspergillus awamori*  
4 BAD06002 *Aspergillus awamori*  
5 AAF14264 *Aspergillus flavus*  
6 BAD01051 *Aspergillus kawachi*  
7 BAA22993 *Aspergillus kawachi*  
8 BAA64850 *Aspergillus niger*  
9 AAF17100 *Aspergillus nidulans*  
10 PS6271 *Aspergillus niger*  
11 CAK44871 *Aspergillus niger*  
12 CAK40249 *Aspergillus niger*  
13 CAK41088 *Aspergillus niger*  
14 CA331218 *Aspergillus oryzae*  
15 BAO12555 *Aspergillus niger*  
16 ABE00431 *Aspergillus tubingensis*  
17 BAA12010 *Cryptococcus sp. S 2*  
18 ABG48762 *Fusicoecum sp. BC04124*  
19 AAO12212 *Lipomyces kononenkoae*  
20 AACA9622 *Lipomyces spencerartinsiae*  
21 AAF175021 *Lipomyces starkeyi*  
22 AFD64461 *Melanconium*  
23 ABE77529 *Ophiostoma floccosum*  
24 EPS26265 *Penicillium oxalicum*  
25 BAA04285 *Phanerochaete chrysosporium*  
26 BAW15173 *Pholiota microspora*  
27 BAF98616 *Pichia burtonii*  
28 AGJ52081 *Rhizomucor pusillus*  
29 ADO28123 *Rhizopus oryzae*  
30 AAD80242 *Saccharomyces cerevisiae*  
31 BAF76467 *Saitozyma flava*  
32 CAB11471 *Schizosaccharomyces pombe*  
33 CAB40006 *Schizosaccharomyces pombe*  
34 CA334162 *Schwannomyces occidentalis*  
35 CAAS1912 *Schwannomyces occidentalis*  
36 ABA03110 *Sclerotinia sclerotiorum*  
37 AAO33110 *Sclerotium amyloclavus*  
38 BAG69580 *Trichoderma viride*  
39 CAJ21046 *Valisaria rubroscia*  
40 AXMK66236 *Alicyclobacillus sp. 18711*  
41 AAO11675 *Alkalimonas amylolytica*  
42 CAL14744 *Anoxybacillus flavithermus*  
43 ABW07373 *Bacillus subtilis*  
44 ABA22149 *Bacillus amyloclavus*  
45 ABB68223 *Bacillus cereus*  
46 CAD26699 *Bacillus halmapalus*  
47 AAS22226 *Bacillus licheniformis*  
48 AEM05860 *Bacillus licheniformis*  
49 AAR00598 *Bacillus megaterium*  
50 AGR05141 *Bacillus paralicheniformis*  
51 BAF69734 *Bacillus pasteurii*  
52 AAA22231 *Bacillus sp. 707*  
53 BAF03567 *Bacillus sp. JAMB 204*  
54 CSC39917 *Bacillus sp. KSM K38*  
55 ABA18785 *Bacillus sp. MK 716*  
56 AAA63900 *Bacillus sp. TS 23*  
57 BSW7262 *Bacillus sp. YX YX1*  
58 AAO0567 *Cytophaga*  
59 AACT7494 *Escherichia coli*  
60 AF241193 *Exiguobacterium sp. DAU5*  
61 AAS22235 *Geobacillus stearothermophilus*  
62 ABX83871 *Geobacillus thermocentrificans*  
63 AFC87893 *Geobacillus thermoleovorans*  
64 ACT170573 *Bacteriosthelium orearii*  
65 BAC02077 *Neisseria meningitidis*  
66 AAS27110 *Salmonella typhimurium*  
67 BAA24178 *Streptococcus equinus*  
68 AAY97431 *Streptococcus equinus*  
69 AANS9233 *Streptococcus mutans*  
70 CDC36060 *uncultured bacterium*  
71 AAF73597 *Vibrio alginolyticus*  
72 ABG62854 *Hydrophaga*  
73 ABB11196 *Parasaccidodiscus brasiliensis*  
74 BAW15172 *Pholiota microspora*  
75 AAB60935 *Aedes aegypti*  
76 AAB60934 *Aedes aegypti*  
77 AAO33322 *Aedes atropalpus*  
78 AAO33323 *Anopheles merus*  
79 AAN77138 *Anopheles merus*  
80 AAN77139 *Anthonomus grandis*  
81 AAN71355 *Asterias rubens*  
82 AAY23288 *Blattella germanica*  
83 BAB72257 *Callosobruchus chinensis*  
84 AAO33050 *Culex tarsalis*  
85 AAF20998 *Drosophila virgifer*  
86 AAF20999 *Drosophila virgifer*  
87 BAB91544 *Drosophila melanogaster*  
88 BAB91544 *Drosophila bocki*  
89 BAA04582 *Drosophila erecta*  
90 BAB91509 *Drosophila kikkawai*  
91 BAAS9437 *Drosophila leontia*  
92 BAAS9441 *Drosophila lini*  
93 BAA54583 *Drosophila mauritiana*  
94 AAN91479 *Drosophila melanogaster*  
95 CAAB28638 *Drosophila melanogaster*  
96 AAB26839 *Drosophila pseudoobscura*  
97 BAA04585 *Drosophila sechellia*  
98 AACA6463 *Drosophila virilis*  
99 AAG60011 *Drosophila yakuba*  
100 CAH76926 *Phaedon cochleariae*  
101 PS5634 *Tenebrio*  
102 AAO33708 *Tribolium castaneum*  
103 AAF73435 *Zabrotes subfasciatus*

[illegible]

|                                            |                                                          |                          |
|--------------------------------------------|----------------------------------------------------------|--------------------------|
| 24_ABL09312_Acarus_siro                    | MQMKFDDIAA-----ECERFLGPK-GYGGIQLSPVNEHAVLG-----N----     | RPWYELYQP-VGYK-IQ-SRSGN  |
| 24_BAB85635_Anguilla_japonica              | FEWKNADIAA-----ECERYLAPN-GFAGVQISPPSESIVLQ-----NFW----   | RPWYERYQP-ISYN-LC-SRSGT  |
| 24_AAL37207_Crassostrea_gigas              | FEWKWSDIAA-----ECERFLGPK-GYCGVQISPPSENRIVT-----NPN----   | RPWEERYQP-VSYK-LV-TRSGN  |
| 24_AAL37183_Crassostrea_gigas              | FEWKWSDIAA-----ECERFLGPK-GYCGVQISPPSENRIVT-----SPN----   | RPWWEERYQP-VSYK-LV-TRSGN |
| 24_AAD38942_Dermatophagoides_ptononyssinus | MEWKYDDIGD-----ECERFLGPK-GYGGVQISPPNEHAILD-----R----     | RPWYERYQP-VSYD-IR-TRSGD  |
| 24_AAD38943_Euroglyphus_maynei             | MEWKYDDIGD-----ECERFLGPK-GYGGVQISPPNEHAILD-----R----     | RPWYERYQP-VSYD-IR-TRSGD  |
| 24_AAC60246_Gallus_gallus                  | FEWKNADIAL-----ECERYLAPN-GFAGVQISPPSENIVIT-----NPN----   | RPWWEERYQP-ISYK-IC-SRSGN |
| 24_ABO26610_Haliotis_discus_discus         | FEWKNWSDIAK-----ECERFLGPK-GYCGVQISPPSENRIVVT-----NPN---- | RPWWEERYQP-VSYK-LQ-TRSGS |
| 24_BAM74656_Haliotis_discus_hannai         | FEWKNWSDIAK-----ECERFLGPK-GYCGVQISPPSENRIVVT-----NPN---- | RPWWEERYQP-VSYK-LQ-TRSGS |
| 24_AAA51724_Homo_sapiens_pancreatic        | FEWKNWVDIAL-----ECERYLAPK-GFGGVQISPPSENVAIY-----NPF----  | RPWWEERYQP-VSYK-LC-TRSGN |
| 24_AAH63129_Homo_sapiens_salivary          | FEWKNWVDIAL-----ECERYLAPK-GFGGVQISPPSENVAIH-----NPF----  | RPWWEERYQP-VSYK-LC-TRSGN |
| 24_AAA37221_Mus_musculus                   | FEWKNWVDIAK-----ECERYLAPN-GFAGVQISPPSENIVVH-----SPS----  | RPWWEERYQP-ISYK-IC-SRSGN |
| 24_AAA37230_Mus_musculus                   | FEWKNWVDIAK-----ECERYLAPK-GFGGVQISPPSENIVVH-----NPS----  | RPWWEERYQP-ISYK-IC-SRSGN |
| 24_H2N004_Oryzias_latipes                  | FEWKNADIAA-----ECERFLGPK-GFAGVQISPPNEHILVS-----SPW----   | RPWWEERYQP-ISYN-LC-SRSGG |
| 24_CAA68065_Pecten_maximus                 | FEWKNWSDIAK-----ECERFLGPK-GFGGVQISPPSENRLVN-----N----    | RPWWEERYQP-VSYK-LQ-TRSGS |
| 24_CAA54524_Penaeus_vannamei               | FEWKWSDIAA-----ECENFLGPK-GFAGVQISPPNEIVEYQG-----DVK----  | RPWWEERYQP-VSYK-LV-TRSGD |
| 24_CAB65552_Penaeus_vannamei               | FEWKWSDIAA-----ECENFLGPK-GFAGVQISPPTECLDAYQG-----DVQ---- | RPWWEERYQP-VSYK-IA-SRSGD |
| 24_AAF65827_Pseudopleuronectes_americanus  | FEWKNADIAA-----ECERYLGNP-GFGGVQISPPNEHIMLD-----NFW----   | RPWWEERYQP-ISYN-LC-SRSGS |
| 24_AAA40725_Rattus_norvegicus              | FEWKNADIAK-----ECERYLAPK-GFGGVQISPPSENILIN-----NFS----   | RPWWEERYQP-ISYK-IC-SRSGN |
| 24_AAH89226_Rattus_norvegicus              | FEWKNWVDIAK-----ECERYLAPN-GFGGVQISPPSENIVVN-----SPF----  | RPWWEERYQP-ISYK-IC-SRSGN |
| 24_P83053_Struthio_camelus                 | FEWKNADIAL-----ECERYLAPY-GFGGVQISPPSENIVIT-----NFX----   | RPWWEERYQP-VSYK-LC-TRSGN |
| 24_AAF02828_Sus_scrofa                     | FEWKNWVDIAL-----ECERYLGNP-GFGGVQISPPSENIVVT-----NPS----  | RPWWEERYQP-VSYK-LC-TRSGN |
| 24_CAC87125_Tetraodon_nigroviridis         | FEWKNWVDIAA-----ECERFLGPN-GFAGVQISPPSEHILID-----SPW----  | RPWWEERYQP-ISYN-LC-SRSGS |
| 32_AAA21016_Aeromonas_hydrophila           | FEWKFNIDIAN-----ECETVLGPK-GFGGVQISPPAEHKQ-----GS-----    | QVWWTIVYQP-VSYKNFN-SFGGC |
| 32_BAA22082_Bacillus_sp_195                | FSWTNNAIAR-----ECTENLGPA-GYGYVQTSPPQEH-----QGAA-----     | WWTHYQP-VSYK-IE-SRFGT    |
| 32_AAY89036_Bifidobacterium_breve          | FQTNWNSVAK-----ECTEAGPE-GYGYVQTSPPMESI-----QOTE-----     | WWTSYQP-VSYK-LD-SKLG     |
| 32_CAB92963_Halomonas_meridiana            | FEWKWSDIAK-----ECENNLGPK-GFAGVQISPPQEHQ-----GD-----      | AMWTRYQP-VSYQ-LE-SRSGS   |
| 32_BAJ52728_Kocuria_varians                | FQWKNWSDIAK-----ACEQTLGPA-GYGYVQTSPPQEH-----TGDQ-----    | WWHYHQP-VSYQ-LE-SRLGT    |
| 32_ARG25402_Microbacterium_aurum           | FSYTWNKIAS-----ECEDTLGPA-GYGYVQTSPPQEHAMVAGEGNF-----     | WWIYYQP-VSYK-LE-SRSGT    |
| 32_CAA41481_Pseudoalteromonas_haloplanktis | FEWKNWQDIAK-----ECEQTLGPK-GYAAVQISPPNEHIT-----GS-----    | QWWTYQP-VSYE-LQ-SRSGN    |
| 32_AAA86835_Pseudomonas_sp_KFCC10818       | FEWKNWQDIAK-----ECEFLGPK-GYAAVQISPPQKQSD-----NF-----     | AWWSRYQP-VSYA-FE-SRSGN   |
| 32_AAA96317_Streptomyces_albus             | FEWKNWQDIAK-----ECTSTLGPA-GYGYVQISPPAEHI-----QGSQ-----   | WWTSYQP-VSYK-IA-SRLGT    |





AABA5446 Paenibacillus polymyxa  
AACA4946 Thermoactinomyces vulgaris  
BAD06003 Aspergillus awamori  
BAD06002 Aspergillus awamori  
AAFI4264 Aspergillus flavus  
BAID01051 Aspergillus kawachii  
BAIZ2993 Aspergillus oryzae  
EAA64850 Aspergillus nidulans  
AAFI7100 Aspergillus nidulans  
PS6271 Aspergillus niger  
CAKA4871 Aspergillus niger  
CAKA0249 Aspergillus niger  
CAKA1088 Aspergillus niger  
CAK31218 Aspergillus oryzae  
BAI01255 Aspergillus shirousami  
ABEB0431 Aspergillus tubingensis  
BAL12010 Cryptococcus sp\_S\_2  
ABGA4762 Fusicoccum sp\_BC04124  
AQUL2212 Lipomyces kononenkoae  
LAW514922 Lipomyces kononenkoae  
LAW514923 Lipomyces kononenkoae  
LAN75021 Lipomyces starkeyi  
AFDS4462 Malbranchea cinnamomea  
ABF72529 Ophiostoma floccosum  
EPS26265 Penicillium oxalicum  
ABQ42285 Phanerochaete chrysosporium  
WAF9616 Phialota burtoni  
AGJ52081 Rhizomorcy pusillus  
ADL28123 Rhizopus oryzae  
ADD80242 Saccharomycopsis fibuligera  
AST67447 Saitozysa flava  
CABI11471 Schizosaccharomyces pombe  
SCHI0062 Schizosaccharomyces pombe  
CCSA3162 Schwanniomyces occidentalis  
ASAI51912 Schwanniomyces occidentalis  
ACN28436 Sclerotinia sclerotiorum  
CAO30110 Thermomyces lanuginosus  
BAG65980 Trichoderma viride  
CAJ21046 Valrharia rubricosa  
WAF9616 Walcottella sp\_18711  
AQUL675 Alkalimonas amylolytica  
CAL41744 Alicyclobacillus flavithermus  
AEW07376 Bacillus acidicola  
AAAZ22191 Bacillus amyloliquefaciens  
ABY86223 Bacillus cereus  
WAD2658 Bacillus cereus  
AAD22262 Bacillus licheniformis  
AEM05860 Bacillus licheniformis  
AAKO0598 Bacillus megaterium  
AGN35141 Bacillus paralicheniformis  
ABR68734 Bacillus\_sp  
AAAZ2231 Bacillus\_sp\_707  
WAF93567 Bacillus\_sp\_DAMB\_04  
CAC39917 Bacillus\_sp\_KSM\_K38  
AAB18785 Bacillus\_sp\_MK\_716  
AAG63900 Bacillus\_sp\_TS\_73  
ABW87262 Bacillus\_sp\_YX\_YX1  
AAF00567 Cytophaga\_sp  
AAC74994 Escherichia coli  
EFZ41193 Exiguobacterium sp\_DAUS  
AAAZ2235 Geobacillus stearothermophilus  
ABXB3871 Geobacillus thermodentificans  
AFCE7883 Geobacillus thermoleovorans  
ACL70573 Halothemotrux oreani  
CAQ30277 Nostoc sp\_FOC\_T719  
WAF71510 Salinisphaera typhimurium  
BAR24178 Streptococcus equinus  
AAAP97431 Streptococcus equinus  
AES59233 Streptococcus mutans  
CDC30600 uncultured bacterium  
ALP73597 Vibrio alginolyticus  
BEG62854 Histoplasma capsulatum  
BSU11196 Histoplasma capsulatum brasiliensis  
BAMI5172 Phialota microspora  
AAAB86093 Aedes aegypti  
AAAB80934 Aedes aegypti  
AAAO3322 Aedes atropalpus  
AAAO3323 Anopheles merus  
WAF7136 Anopheles gambiae  
AAAN77139 Anthonomus grandis  
AAO13555 Asterias rubens  
AAAV23288 Blattella germanica  
BAB72257 Callosobruchus chinensis  
AAAO3350 Culex tarsalis  
AAP20998 Diabrotica virgifera virgifera  
CAA3243 Diabrotica virgifera  
BBAP1544 Diabrotica bocki  
BAOA4582 Drosophila erecta  
BAB91509 Drosophila kikkawai  
BAAY5437 Drosophila leontia  
BAAR9441 Drosophila lini  
BAOA4583 Drosophila melanogaster  
BAK93479 Drosophila melanogaster Amyrel  
BAAC2838 Drosophila melanogaster  
AAC46839 Drosophila pseudoobscura  
BAOA4585 Drosophila sechellia  
AAC46463 Drosophila virilis  
BAG60011 Drosophila yakuba  
CBM7656 Drosophila yakuba  
WP5634 Tenebrio molitor  
AAAO3708 Tribolium castaneum  
AAP73435 Zabrotes subfasciatus  
ABLO9312 Acarus siro  
BARB8563 Anguilla japonica  
AAL37207 Crassostrea gigas  
BAAT37193 Crassostrea gigas  
AAD38942 Dermatophagoides pteronyssinus  
AAD38943 Eurygllyphus maynei  
AACG0246 Gallus gallus  
ABQ26610 Haliotis discus discus  
BMH74659 Haliotis discus hannai  
BAAT7974 Haliotis discus discus  
AAHG3126 Homo sapiens salivary  
AAAK37221 Mus musculus  
AAAK37220 Mus musculus  
ZHND04 Orzyzias latipes  
CAAG6065 Pecten maximus  
CAAS4524 Pennaeus vannamei  
CAAG6552 Penaeus monodon  
AAF58572 Pleuropleuronectes americanus  
AAAO4725 Rattus norvegicus  
AAAH8828 Rattus norvegicus  
BP3053 Struthio camelus  
AAF02828 Sus scrofa  
CAC87121 Tetraodon nigroviridis  
BAAT37193 Tetraodon lineatilis  
BAAT22082 Bacillus\_sp\_195  
AAAY89038 Bifidobacterium breve  
CAN92363 Halomonas meridiana  
BAJ52708 Kocuria varians  
AGZ5402 Microbacterium aurum  
CAAT41491 Microbacterium haloplanktis  
AAAG6835 Pseudomonas sp\_KFCCL0818  
AAAG96317 Streptomyces albus

[illegible]

CSR-I

[illegible]

|                                         |    |
|-----------------------------------------|----|
| RT-AFQNMMINTCHTAGVKRVVV                 | DS |
| RA-AFKSMVDTCHAAQKRVVIA                  | DS |
| RD-AFASVMVSACHAAGKRVVIA                 | DS |
| RA-AFKSMVDTCHAAQKRVVIA                  | DA |
| RA-AFKSMVDTCHAAQKRVVIA                  | DS |
| RT-AFKSMVDTCHAAQKRVVIA                  | DS |
| RD-QFAMVMTCHSAGGVKIT                    | DA |
| RA-AFRSMVMTCHAAQKRVVV                   | DS |
| RT-AFRNMIDTCHAAQKRVVV                   | DS |
| RA-DFIDMVNTCREAGKVIYV                   | DA |
| RA-DFIDMVNTCREAGKVIYV                   | DA |
| RS-QLQNMMINTCHSAGKRVVIA                 | DT |
| RA-QFQNMISTCHSAGGVKIT                   | DT |
| RA-QFQNMISTCHSAGGVKIT                   | DT |
| RA-QFQNMVTVCHTAGKRVVIA                  | DT |
| RQ-QFQNMVVSACHAAGKRVVIA                 | DT |
| RS-QFANMVSTCHSAGGVKIT                   | DT |
| RD-QFASMITTCHAAQGVVIT                   | DT |
| RT-SFANMITTCHAAQGVVIT                   | DT |
| RS-QFQSMVSTCHSAGGVKIT                   | DT |
| RD-QFQNMISTCHTAGKRVVIA                  | DT |
| RD-EFANMITTCHAAQKRVVIA                  | DT |
| RS-QYKNMIDTCHAAQGVVIA                   | DT |
| RG-QFQKMI SACHGAQKRVVIA                 | DT |
| RD-QFQNMIDTCHAAQGVVIT                   | DT |
| RT-QFANMIATCHAAQGVVIA                   | DT |
| RS-QFANMITTCHAAQKRVVIA                  | DT |
| RT-SFANMITTCHAAQGVVIT                   | DT |
| RD-EFANMITTCHAAQGVVIAGIIPRSFYHSDSIATKPV | DT |
| RS-QYQNMMINTCHAAKRVVIA                  | DT |
| RD-QFASMITSTCHQAQGVVIT                  | DT |
| RD-EFANMITTCHAAQKRVVIA                  | DT |
| RA-QYQNMISTCHSAGGVKIT                   | DT |
| RS-QFQDMVSACHSAGGVKIT                   | DT |
| RA-QFQNMISTCHTAGKRVVIA                  | DT |
| RQ-QFQNMISTCHSAGGVKIT                   | DT |
| RD-QYTNMINTCHSAGKRVVIA                  | DT |
| RQ-QYQNMVTTCHAAQKRVVIA                  | DT |
| RA-QYANMITTCHAAQKRVVIA                  | DT |
| RD-QFANMITTCHAAQKRVVIA                  | DT |
| RT-QYANMITTCHAAQKRVVIA                  | DT |
| ET-QYQNMIMKTCEAAGKVIIA                  | DT |
| RD-QYQSMITQCKSAGGVKIT                   | DT |
| RQ-QFANMI SACHSAGGVVIT                  | DT |
| RA-QFANMVNTCRAAGVSI IIA                 | DT |
| RD-QYTNMINTCHSAGKRVVIA                  | DT |
| RD-QFQSMITCHAAQKRVVIA                   | DT |
| RS-QFANMITTCHAAQKRVVIA                  | DT |
| RT-QFQNMISTCHSAGGVKIT                   | DA |
| RA-QFANMIATCHAAQGVVIA                   | DT |
| RA-QFASMITTCHAAQKRVVIA                  | DT |
| RA-QYQNMISTCHAAQKRVVIA                  | DT |
| RS-QFQNMISTCHSAGGVKIT                   | DT |
| QA-QFQSMI SACHSAGKRVVIA                 | DT |
| RS-QFASMVTTCHAAQKRVVIA                  | DT |
| RA-QFQSMIETCHAGGLVIA                    | DT |
| RD-QYANMINTCHSAGKVI IIA                 | DT |
| RA-QFASMITTCHAAQKRVVIA                  | DT |
| RD-QFQNMISTCHSAGGVKIT                   | DT |
| RA-QFQNMINTCHSAGKRVVIA                  | DT |
| RD-QYADMVSRCNAGVGGI IIA                 | DT |
| RD-QYTNMVSRCNAGVGGI IIA                 | DT |
| RD-QFQNMVSTCATAGVGGI IIA                | DT |
| RD-QFQSNMVSTCHNAGKRVVIA                 | DT |
| RS-QFQNMIMNACHSAGGVVIT                  | DT |
| RA-QYQSMIETCHSAGGVKIT                   | DT |
| RA-QYQSMIETCHSAGGVKIT                   | DT |
| RD-QFQNMVSTCHNAGKRVVIA                  | DT |
| RT-QFQNMIDTCHNAGKRVVIA                  | DT |
| RS-EFANMVTTCHNAGGLVIV                   | DT |
| RT-QFATMVATCHSAGKRVVIT                  | DT |
| RE-QFASMITQCSAAGGVVIA                   | DV |
| RD-QFANMVSTCHSAGGVKIT                   | DT |
| RD-QFANMVSTCHSAGGVVIT                   | DT |
| RE-QFASMITRCHAAQKRVVIA                  | DT |
| RD-SYKNNMIDTCHAAQKRVVIA                 | DT |
| RA-QFAMMVTTCSAGGVVIT                    | DV |
| RQ-QFQSDMIQACHSAGGVVIT                  | DT |
| RA-QFQNMISTCHSAGGVKIT                   | DT |
| RA-ALASMIETACHKRVKRVVIA                 | DA |
| RS-QYQAMVQTCHAAQGLVIA                   | DT |
| RA-SFRNMVDTCHAAQKRVVIA                  | DA |
| RA-QFQNMINTCHAAQKRVVIA                  | DT |
| RQ-QFQNMVNVCHNAGVSVIT                   | DT |
| RD-QFANMVSTCHAAQGVVIT                   | DV |
| RE-QFQNMISTCHSAGGVKIT                   | DV |
| RV-QFQNMVTCCHDAGKRVVIA                  | DS |
| KE-ELASMVSTCHDAGVSVIT                   | DI |
| RD-EFASMIQCCHDADQVIV                    | DT |
| RE-QFQNMVNVCHNAGVSVIT                   | DT |
| RD-DLRNMIDTCHAAQKRVVIT                  | DT |
| RE-EFASMIETCHNAGKRVVIA                  | DA |
| RE-QLATIMDACHKRVKRVVIA                  | DA |
| RD-QFATMVKTCHNAGGVVIA                   | DT |
| RA-QFERMVVACHSAGKRVVIA                  | DT |
| RS-QFQNMISTCHSAGGVKIT                   | DT |
| RD-QFQNMVSCNAGQGVVIA                    | DT |
| RA-EYEMVVSACNAGKRVVIA                   | DA |
| RE-QFAMMVSTCHSAGGVKIT                   | DT |
| EA-EFASMVSTCADAGGVIT                    | DT |
| RE-EFIDMVNTCKTAGGVVIA                   | DA |
| RS-EFANMI GKCKAGKRVVIV                  | DT |
| RD-QFANMVSTCKSAGGVNIIA                  | DV |
| RA-QFANMVQACRTAGGVVIT                   | DT |
| RD-QFANMITTCHAAQGVVIT                   | DT |
| RE-QFQNMISTCHSAGGVKIT                   | DA |
| AD-QFQNMVMTCKTAGGVVIT                   | DI |
| RD-EFSSMVTTCKNAGGVVIT                   | DT |
| RD-QFQNMVVAICNAGGVVIA                   | DA |
| SD-SFQSMVDTCHSAGKRVVLS                  | DT |
| RD-EFQSMVETCHAAQKRVVIA                  | DI |
| RD-EFQSMVETCHSAGGVKIT                   | DT |
| RE-EFQSMVETCHSAGGVKIT                   | DT |
| AD-QFANMIVKSCNAGVAVLL                   | DT |
| RD-QFQRMVKECHTAGKRVIT                   | VD |
| RE-SFQSMVNTCHSAGGVKIT                   | DS |
| RE-QFQSMVNTCHSAGGVKIT                   | DT |
| RD-SFRNMIDTCHSAGKRVVIA                  | DT |
| RE-QFQNMISTCHSAGGVKIT                   | DT |
| RA-AFQNMVNTCHSAGKRVVV                   | DT |
| RT-AFQNMVNTCHTAGKRVVIA                  | DT |
| RA-SFVNVMVNTCHSAGKRVVIA                 | DA |
| RE-QFQNMVNTCHSAGGVVEA                   | DT |
| RG-FFLNMVSTCKSAGGVKIT                   | DI |
| PC-QFQNMVNRCHNAGGVVIT                   | DA |
| RE-EFADMVSTCNAGVGGI IIA                 | DT |
| EA-EFADMVQVORTSAGGVVIT                  | DT |
| EA-EFQDMVQVRCGGAGGVVIT                  | DV |
| QA-EFESMVSTCNAGAGGVVIT                  | DV |
| EA-EFQDMVQVRCASAGGVVIT                  | DV |
| EA-EFQDMIERQCGAGGVVIA                   | DV |
| RGATVQVMTCHSAGGVKIT                     | DT |
| AGASYQDILDAHAGMKRVVIA                   | DT |
| EGATYQDLINECHKKRVKI VQ                  | DT |

DTVNHHMSAG  
 DSVINHMAAGS  
 DAVNHMAAGS  
 DSVINHMAAGS  
 DSVNHMSAGN  
 DTVNHMSAGN  
 DAVNHMAAGS  
 DTVLNHMSAGS  
 DSVINHMMAGS  
 DAVINHMTGTGSAG  
 DAVINHMTGTGSAG  
 DTLNHHMAGVDS  
 DTLNHHMAGIDS  
 DTLNHHMAGIDS  
 DTLNHHMAGVDS  
 DTLNHHMAGSDS  
 DTLNHHMAGVES  
 DTLNHHMAGVDS  
 DTLNHHMAGVDS  
 DTLNHHMAGVDS  
 DTLNHHMAGVDS  
 DTLNHHMTGMSD  
 DTLNHHMAGMSD  
 DTLNHHMAGIDS  
 DTLNHHMSGNDN  
 DTLNHHMAGVDS  
 DTLNHHMAGIDS  
 DTLNHHMAGVDS  
 DTVLNHHMTGMSD  
 DTLNHHMTGEDS  
 DTLNHHMAGVDS  
 DTLNHHMTGMSD  
 DTLNHHMSGLD  
 DTLNHHMAGVDS  
 DTLNHHMTGNAQ  
 DTLNHHMVS - S  
 DTLNHHMSGDS  
 DTLNHHMSGDS  
 DTLNHHMSGDS  
 DTLNHHMSGDS  
 DTLNHHMSGDS  
 DTLNHHMTGESN  
 DTLNHHMAGADS  
 DTLNHHMTGQSS  
 DTLNHHMAGIES  
 DTLNHHMAGIGG  
 DTLNHHMSGSD  
 DTLNHHMTGSDS  
 DTLNHHMTGSDS  
 DTLNHHMTGSDS  
 DAVLNHHMTGG - S  
 DTLNHHMTAKDN  
 DTLNHHMAGSDS  
 DTLNHHMTGVAS  
 DTLNHHMAGIES  
 DTLNHHMAGVDS  
 DTLNHHMAGIDS  
 DTLNHHMTGNAE  
 DTLNHHMSKVES  
 DTVNHHMSAQSS  
 DTVLNHHMAGS  
 DTVLNHHMAGANS  
 DTLNHHMTGESS  
 DTLNHHMTGESN  
 DTVLNHMTA - GG  
 DTLNHHMAGIDS  
 DTLNHHMAGIDS  
 DTLNHHMAGISG  
 DTLNHHMAGISG  
 DTLNHHMAGISG  
 DTLNHHMAGVDS  
 DTLNHHMAGSDS  
 DTLNHHMAGINS  
 DTLNHHMSGQDS  
 DTVNHHMAGGSS  
 DTVNHHMSGQDS  
 DTLNHHMSGIDS  
 DTLNHHMTAMDS  
 DTVLNHHMAGIDS  
 DTVLNHHMQGDS  
 DTLNHHMAGIDS  
 DTLNHHMAGTES -  
 DAVLNHHMTGSD - A  
 DTLNHHMSGQD - N  
 DAVLNHHMTGSDS  
 DTLNHHMTGAS  
 DTLNHHMAGIDS  
 DTLNHHMSGVDS  
 DTVNHHMTGXE - SG  
 DSVLNHHMTGXE - SG  
 DSVLNHHMTGXE - SG  
 DILFNHMTAQQ - NG  
 DAVFNHMTAQQ - NG  
 DTVNHHMAGIDS  
 DTVNHHMAGIDS  
 DTVNHHMAGSDS  
 DAVLNHHMTGSD - A  
 DTLNHHMSGQD - S  
 DTLNHHMTAKD - SG  
 DTLNHHMAGIDS  
 DTLNHHMSAQTS  
 DAVLNHHMSGSA - FG  
 DTVNHHMSAS - S  
 DAVLNHHMTAG  
 DAVNHHMSGAS - A  
 DTVNHHMAGVD - N  
 DTVNHHMAGTDS  
 DTVLNHHMSAQG - S  
 DTVNHHMAGISB  
 DTVNHHMAGVD - N  
 DTVNHHMTGID - G  
 DAVNHHMAGSD - S  
 DAVLNHHMSALN - N  
 DAVNHHMAGFD - N  
 DTVNHHMGFD - S  
 DTVNHHMSFL - SG  
 DTVNHHMSLSL  
 DTCNNHMSGTY - E  
 VDTLNHISATQ - G  
 DSVNHHMSAGG  
 DAVLNHHMSAG  
 DTVNHHMSARS  
 DTVNHHMSAGS  
 DTLNHHMSAGS  
 DTVNHHMSSGS  
 DAVNHHMSSGS  
 DVMNHLTGGPNSSG  
 DTVNHHMTAGS  
 DAVNHHMSGRE - C  
 DTVNHHMTANT - A  
 DAVLNHHMSAGTT - E  
 DTVNHHMSAGTT - E  
 DTVNHHMTGSS - AST  
 DTVNHHMSAGITT - E  
 DTVNHHMSAGITT - EDRRG  
 DAVNHHMSGTSG - NLFPTTVYG - KRDSQWSYYTDA  
 DTVNHHMSGTSG - GLFPTTVYG - VRDSQWSYYTDE  
 DVLNHTSBNRGR - GLFPMISRDYHLTDGVGTGNYAEYDE

[illegible]

1 AAA5446 Paenibacillus polymyxa  
1 CAA49465 Thermoactinomyces vulgaris  
1 BAD06003 Aspergillus awamori  
1 BAD06002 Aspergillus awamori  
1 AAF14264 Aspergillus flavus  
1 BAD01051 Aspergillus kawachii  
1 BAA22993 Aspergillus kawachii  
1 EAA64850 Aspergillus nidulans  
1 AAF17100 Aspergillus nidulans  
1 P56271 Aspergillus niger  
1 CAA44871 Aspergillus niger  
1 CAA40249 Aspergillus niger  
1 CAA41088 Aspergillus niger  
1 CAA31218 Aspergillus oryzae  
1 BAA01255 Aspergillus shirousami  
1 AEB80431 Aspergillus tubingensis  
1 BAA12010 Cryptococcus sp. S.2  
1 ABG48762 Fusicoccum sp. BCC4124  
1 AAO12212 Lipomyces Kononenkoae  
1 AAC49622 Lipomyces spenceri  
1 AAN75021 Lipomyces starkeyi  
1 AFD54462 Malbranchea cinnamomea  
1 ABF72529 Ophiostoma floccosum  
1 EBF26265 Penicillium lanuginosum  
1 ABQ42285 Phanerochaete chrysosporium  
1 BAW15173 Pholiota microspora  
1 BAF98616 Pichia burtonii  
1 AGJ52081 Rhizomucor pusillus  
1 ADL28123 Rhizopus oryzae  
1 AD080242 Saccharomyces fibuliger  
1 ABS76467 Saccharomyces flava  
1 CAB11471 Schizosaccharomyces pombe  
1 CAB40006 Schizosaccharomyces pombe  
1 CAA34162 Schwanniomyces occidentalis  
1 CAA51912 Schwanniomyces occidentalis  
1 ACN82436 Sclerotinia sclerotiorum  
1 CAA03110 Thermomyces lanuginosus  
1 BAG95980 Trichoderma viride  
1 CAJ21046 Valsaria rubricosa  
5 AWX62636 Alicyclobacillus sp. 18711  
5 AAQ01675 Alkalimonas amylolytica  
5 CAL14744 Anoxybacillus flavithermus  
5 ABW07376 Bacillus acididoli  
5 ABA22191 Bacillus anthracis  
5 ABY86223 Bacillus cereus  
5 CAD26699 Bacillus halmapalus  
5 AAA22226 Bacillus licheniformis  
5 AEM05860 Bacillus licheniformis  
5 AAK00598 Bacillus megaterium  
5 ABA35141 Bacillus paralicheniformis  
5 AAR68734 Bacillus sp.  
5 AAA22231 Bacillus sp. 707  
5 BAF03567 Bacillus sp. JAMB 204  
5 CAC39917 Bacillus sp. KSM K38  
5 AAB18785 Bacillus sp. MK 716  
5 AAA63900 Bacillus sp. TS 23  
5 ABW7262 Bacillus sp. YX YK1  
5 AAF00567 Cytophaga sp.  
5 AAC74994 Escherichia coli  
5 AFZ41193 Exiguobacterium sp. DAU5  
5 AAA22235 Geobacillus stearothermophilus  
5 ABX38371 Geobacillus thermodenitrificans  
5 AFG07833 Geobacillus thermoleovorans  
5 ACL70573 Halobacterium salinarum  
5 CAQ30277 Nostoc sp. POC 7119  
5 AAA27110 Salmonella typhimurium  
5 BAA24178 Streptococcus equinus  
5 AAA97431 Streptococcus equinus  
5 AAN59233 Streptococcus mutans  
5 CCB30600 Streptococcus mutans  
5 ALP73597 Vibrio alginolyticus  
5 ABK62854 Histoplasma capsulatum  
5 ABS11196 Paracoccidioides brasiliensis  
5 BAW15172 Pholiota microspora  
15 AAB60935 Aedes aegypti  
15 AAB60934 Aedes aegypti  
15 AAA03322 Aedes atropalpus  
15 AAA03323 Anopheles merus  
15 AAN77138 Anthonomus grandis  
15 AAN77139 Anthonomus grandis  
15 AAO13755 Asterias rubens  
15 AAY23288 Blattella germanica  
15 BAB72257 Callosobruchus chinensis  
15 AAA03350 Culex tarsalis  
15 AAF20998 Diabrotica virgifera virgifera  
15 AAC35243 Drosophila ananassae  
15 BAB91544 Drosophila bocki  
15 BAA04582 Drosophila erecta  
15 BAB91509 Drosophila kikkawai  
15 BAB95437 Drosophila lecontei  
15 BAA95441 Drosophila lini  
15 BAA04583 Drosophila mauritiana  
15 AAK93479 Drosophila melanogaster Amyrel  
15 CAA28238 Drosophila melanogaster  
15 AAK46839 Drosophila pseudoobscura  
15 BAA04585 Drosophila pseudoobscura  
15 AAC46463 Drosophila virilis  
15 AAG60011 Drosophila yakuba  
15 CAA76926 Phaedon cochleariae  
15 P56634 Tenebrio molitor  
15 AAA03708 Tribolium castaneum  
15 AAF73435 Zabrotes subfasciatus  
24 AB109312 Acarus siro  
24 BAB5635 Anguilla japonica  
24 AAL37207 Crassostrea gigas  
24 AAL37183 Crassostrea gigas  
24 AAD38942 Dermatophagoides pteronyssinus  
24 AAD38943 Euroglyphus maynei  
24 AAO60246 Gallus gallus  
24 ABO26610 Haliotis discus discus  
24 BAM74656 Haliotis discus hannai  
24 AAA51724 Homo sapiens pancreatic  
24 AAR63129 Homo sapiens salivary  
24 AAA37221 Mus musculus  
24 AAA37230 Mus musculus  
24 B2R004 Oryzias latipes  
24 CAA68065 Pecten maximus  
24 CAA54524 Penaeus vannamei  
24 CAB65552 Penaeus vannamei  
24 AAF65827 Pseudopleuronectes americanus  
24 AAA40725 Rattus norvegicus  
24 AAB88228 Rattus norvegicus  
24 P93053 Streptococcus camelus  
24 AAF02828 Sus scrofa  
24 CAC87125 Tetraodon nigroviridis  
32 AAA21016 Aeromonas hydrophila  
32 BAA22082 Bacillus sp. 195  
32 AAY89038 Bifidobacterium breve  
32 CAB92963 Bifidobacterium meridianum  
32 BAJ52728 Bifidobacterium varians  
32 AAG25402 Microbacterium aurum  
32 CAA1481 Pseudalteromonas haloplanktis  
32 AAB6835 Pseudomonas sp. KFC10818  
32 AAA96317 Streptomyces albus



|    |            |                                 |                     |                |                                  |        |   |               |         |     |     |
|----|------------|---------------------------------|---------------------|----------------|----------------------------------|--------|---|---------------|---------|-----|-----|
| 32 | BAC73693   | Streptomyces avermitilis        | -L                  | -Y             | -SSYDMD                          | -CT    | - | -ATITD        | -T      | -NR |     |
| 32 | CAA40798   | Streptomyces griseus            | -I                  | -W             | -SGADMD                          | -CR    | - | -SEIND        | -G      | -NR |     |
| 32 | AAA26698   | Streptomyces hygroscopicus      | -F                  | -Y             | -QDQFFHG                         | -CR    | - | -KSISD        | -T      | -NR |     |
| 32 | AAA88554   | Streptomyces linosus            | -I                  | -W             | -SGADMD                          | -CR    | - | -SEIND        | -G      | -NR |     |
| 32 | CAB06622   | Streptomyces lividans           | -L                  | -Y             | -SSNDLON                         | -CT    | - | -SQINN        | -G      | -DR |     |
| 32 | CAA73775   | Streptomyces sp_T01             | -L                  | -Y             | -SSYDFDD                         | -ST    | - | -SQVNT        | -G      | -DR |     |
| 32 | AAA82875   | Streptomyces sp_WL6             | -Y                  | -F             | -GDADFHT                         | -CT    | - | -TAIKD        | -T      | -DR |     |
| 32 | AAA26697   | Streptomyces thermoviolaceus    | -L                  | -Y             | -SAPDFDD                         | -CR    | - | -AEITD        | -Q      | -DR |     |
| 32 | AA36561    | Streptomyces venezuelae         | -L                  | -Y             | -SGSDMD                          | -CR    | - | -ATISN        | -Q      | -DR |     |
| 32 | ABP13430   | Thermobifida fusca              | -I                  | -Y             | -QSDQFMD                         | -CR    | - | -RDITN        | -N      | -DK |     |
| 32 | CAA41981   | Thermomicrospora curvata        | -I                  | -Y             | -QSDQFMD                         | -CR    | - | -RDITN        | -N      | -DK |     |
| 32 | BAV60949   | Pholiota microspora             | -L                  | -Y             | -QNQDFHH                         | -CG    | - | -LEPG         | -DDIVN  | -D  | -NA |
| 32 | KJA26527   | Hypholoma sublateritium         | -Y                  | -Y             | -QNQDFHH                         | -CG    | - | -LEPN         | -DDIVN  | -D  | -NA |
| 32 | KDR78015   | Galerina marginata              | -Y                  | -Y             | -QFTDFHH                         | -CG    | - | -LEPD         | -DDIVN  | -D  | -NR |
| 32 | PPQ83160   | Psilocybe cyanescens            | -Y                  | -Y             | -QNQDFHH                         | -CG    | - | -LEPG         | -DDIVN  | -S  | -NR |
| 32 | KT32361    | Moniliophthora roreri           | -Y                  | -Y             | -QNQDFHH                         | -CG    | - | -LESG         | -DDIVN  | -G  | -NR |
| 32 | KDQ30003   | Pleurotus ostreatus             | -Y                  | -Y             | -QTQDFHH                         | -CG    | - | -LEPG         | -DDIVN  | -S  | -NR |
| 32 | RDX41646   | Polyporus brumalis              | -Y                  | -Y             | -QNQDFHH                         | -CG    | - | -LEPG         | -DDIVN  | -D  | -NA |
| 32 | OJT13448   | Trametes pubescens              | -Y                  | -Y             | -QNQDFHH                         | -CG    | - | -LEPG         | -DDIVN  | -D  | -NA |
| 32 | PFH45132   | Amanita thiersii                | -Y                  | -Y             | -QVQDFHH                         | -CG    | - | -LEPG         | -DDIVN  | -G  | -NR |
| 32 | KIM37787   | Hebeloma cylindrosporum         | -Y                  | -Y             | -QDQNFHH                         | -CG    | - | -LRPG         | -DDIVD  | -T  | -NR |
| 32 | PRK61492   | Armillaria solidipes            | -Y                  | -Y             | -QYQDFHH                         | -CT    | - | -LTST         | -GDIED  | -T  | -SR |
| 32 | ETW76368   | Heterobasidium irregulare       | -Y                  | -Y             | -QTQDFHH                         | -CG    | - | -LEPG         | -DDIVN  | -D  | -NR |
| 32 | RDB27268   | Heterobasidium mediterraneum    | -Y                  | -Y             | -QYQDFHH                         | -CG    | - | -LTSG         | -DDIVN  | -D  | -NR |
| 32 | PPQ71147   | Gymnopilus dilepis              | -Y                  | -Y             | -DYDNFHH                         | -CG    | - | -LEPD         | -DDIVN  | -D  | -NR |
| 32 | OSD07916   | Trametes coccinea               | -Y                  | -Y             | -QNQDFHH                         | -CG    | - | -LEPG         | -DDIVN  | -D  | -NA |
| 32 | KZW01389   | Exidia glandulosa               | -Y                  | -Y             | -QNQDFHH                         | -CG    | - | -LESG         | -DDIVN  | -S  | -NR |
| 32 | EIW55835   | Trametes versicolor             | -Y                  | -Y             | -QNQDFHH                         | -CG    | - | -LEPG         | -DDIVN  | -D  | -NA |
| 32 | SJL11930   | Armillaria ostoyae              | -Y                  | -Y             | -QYQDFHH                         | -CT    | - | -LTST         | -GDIED  | -T  | -SR |
| 32 | PAV18085   | Pyrenopeziza noxium             | -Y                  | -Y             | -QYQDFHH                         | -CG    | - | -LEPN         | -DDIVN  | -D  | -NR |
| 32 | RPO65356   | Lentinus tigrinus               | -Y                  | -Y             | -EQQDFHH                         | -CG    | - | -LEPG         | -DDIVN  | -D  | -NA |
| 32 | PRK84861   | Armillaria gallica              | -Y                  | -Y             | -DPHH                            | -CT    | - | -LTST         | -GDIED  | -T  | -SR |
| 32 | KLO18298   | Schizopora paradoxa             | -Y                  | -Y             | -DNSSFHH                         | -CG    | - | -LEPD         | -DDIVN  | -D  | -NR |
| 32 | PPR08271   | Panaeolus cyanescens            | -Y                  | -Y             | -QNQDIHH                         | -CG    | - | -LEPG         | -DDIVN  | -S  | -NR |
| 32 | KIK53845   | Gymnopus luxurians              | -Y                  | -Y             | -QTQDFHH                         | -CG    | - | -LEPG         | -DDIVN  | -D  | -NR |
| 32 | KI264431   | Sphaerobolus stellatus          | -Y                  | -Y             | -QAQDFHH                         | -CG    | - | -LEPG         | -DDIVN  | -D  | -NR |
| 32 | EJ007843   | Botryobasidium mediterraneum    | -Y                  | -Y             | -QYQDFHH                         | -CG    | - | -LEPG         | -DDIVN  | -S  | -NR |
| 32 | EPQ53992   | Gloeophyllum trabeum            | -Y                  | -Y             | -EYQDFHH                         | -DC    | - | -GEAD         | -QNDIN  | -D  | -NR |
| 32 | KIP11288   | Phlebiopsis gigantea            | -Y                  | -Y             | -ESQDFHH                         | -CG    | - | -LEPD         | -DDIVN  | -D  | -NR |
| 32 | KIY62009   | Cylindrobasidium torrendii      | -Y                  | -Y             | -QTQDFHH                         | -CG    | - | -LTSG         | -DDIVD  | -S  | -NR |
| 32 | KIJ69360   | Hydnomerulius pinastri          | -Y                  | -Y             | -YTS-DNFHH                       | -CG    | - | -LEPD         | -DDIVN  | -D  | -NR |
| 32 | KZT20455   | Neolentinus lepideus            | -Y                  | -Y             | -QNADFHH                         | -CG    | - | -GEFD         | -DDIVN  | -D  | -NR |
| 32 | SGH97351   | Serpula lacrymans var lacrymans | -Y                  | -Y             | -YSA-DNFHH                       | -CG    | - | -LEPG         | -DDIVN  | -D  | -NR |
| 32 | KDQ60610   | Botryobasidium botryosum        | -Y                  | -Y             | -QYQDFHH                         | -CG    | - | -LQSG         | -DDIVN  | -S  | -NR |
| 32 | PPR00074   | Panaeolus cyanescens            | -Y                  | -Y             | -GSQDFHH                         | -CG    | - | -SPG          | -NDINN  | -F  | -DR |
| 32 | EKM53319   | Phanerochaete carnea            | -Y                  | -Y             | -EYQDFHH                         | -CG    | - | -LEPD         | -DDIVD  | -S  | -NR |
| 32 | TBU45601   | Dichomitus squalens             | -Y                  | -Y             | -QNQDFHH                         | -CG    | - | -LEPG         | -DDIVN  | -D  | -NR |
| 32 | PSR82077   | Phlebia centrifuga              | -Y                  | -Y             | -QNQDFHH                         | -CG    | - | -LEPG         | -DDIVN  | -D  | -NR |
| 32 | KIM89391   | Piloderma croceum               | -Y                  | -Y             | -EAQDFHH                         | -CG    | - | -LEPN         | -DDIVD  | -S  | -NR |
| 32 | PIL31175   | Gaeumannomyces grisea           | -Y                  | -Y             | -QYQDFHH                         | -CG    | - | -LEPG         | -DDIVN  | -D  | -NR |
| 32 | KIY70325   | Cylindrobasidium torrendii      | -Y                  | -Y             | -QTQDFHH                         | -CG    | - | -LTSG         | -DDIED  | -T  | -NL |
| 32 | KDQ58060   | Jaapia argillacea               | -Y                  | -Y             | -NSTNFHH                         | -CG    | - | -LEPD         | -DDIVN  | -D  | -NR |
| 32 | CEL62905   | Rhizoctonia solani              | -Y                  | -Y             | -QCTQDFHH                        | -CG    | - | -LQPG         | -DDIVN  | -N  | -NR |
| 32 | GAT57350   | Mycena chlorophos               | -Y                  | -Y             | -NTTNFHH                         | -CG    | - | -LEPG         | -DDIVN  | -N  | -NR |
| 32 | KIM25608   | Serendipita vermifera           | -Y                  | -Y             | -GTQDFHH                         | -CG    | - | -LTSG         | -DDIVD  | -S  | -NR |
| 32 | GAM02849   | Lentinula edodes                | -Y                  | -Y             | -EAQDFHH                         | -CG    | - | -LEPG         | -DDIVN  | -D  | -NR |
| 32 | TCB63303   | Steccherinum ochraceum          | -Y                  | -Y             | -QSDDFHH                         | -CG    | - | -LQPD         | -DDIVD  | -S  | -NR |
| 32 | KZP22139   | Fibularhizoctonia sp CBS_109695 | -G                  | -Y             | -Y-SATSFHH                       | -CG    | - | -LEPN         | -DDIVN  | -D  | -NR |
| 32 | KII90441   | Plicaturopsis crispa            | -P                  | -Y             | -YTDNGDFHH                       | -CN    | - | -NGND         | -DNTQN  | -D  | -NS |
| 32 | KDQ58058   | Jaapia argillacea               | -Y                  | -Y             | -DTTNFHH                         | -CG    | - | -LEPG         | -DDIEN  | -D  | -NR |
| 32 | OCH93218   | Obba rivulosa                   | -Y                  | -Y             | -SDSDFHS                         | -CR    | - | -T            | -TIITD  | -D  | -NE |
| 32 | EMD36390   | Gelatopora subvermispora        | -Y                  | -Y             | -SDSDFHS                         | -CR    | - | -T            | -SITS   | -D  | -DE |
| 32 | EIM78746   | Cosmophora puteana              | -P                  | -Y             | -YTS-DNFHH                       | -CT    | - | -N            | -MAIED  | -NE | -NR |
| 32 | KII86244   | Plicaturopsis crispa            | -Y                  | -Y             | -QANESEIADMPBPPTPKHFFVLPFGQWLESG | -DDIVN | - | -             | -DDIVN  | -D  | -NR |
| 32 | EKM75205   | Agaricus bisporus               | -Y                  | -Y             | -QIQDFHH                         | -CG    | - | -FHFS         | -DDIEN  | -S  | -NR |
| 32 | KZT36083   | Sistotremastrum suecicum        | -Y                  | -Y             | -ASTDFHT                         | -NC    | - | -GTFD         | -NQIDD  | -N  | -NA |
| 32 | KZS90559   | Sistotremastrum niveocreum      | -Y                  | -Y             | -ASTDFHT                         | -NC    | - | -GTFD         | -NQIDD  | -N  | -NA |
| 32 | EFI98134   | Schizophyllum commune           | -Y                  | -Y             | -QTQDFHH                         | -CG    | - | -LESG         | -DDIVN  | -S  | -NR |
| 32 | BBC62173   | Tricholoma matsutake            | -Y                  | -Y             | -QTQDFHH                         | -CG    | - | -LTFG         | -DDIVD  | -S  | -NR |
| 32 | CCA69081   | Steccherinum indicum            | -Y                  | -Y             | -QYQDFHH                         | -CG    | - | -LTST         | -GDIVD  | -S  | -NR |
| 32 | EFI98135   | Schizophyllum commune           | -Y                  | -Y             | -QTQDFHH                         | -CG    | - | -LEPY         | -DDINN  | -G  | -NR |
| 32 | KII85613   | Plicaturopsis crispa            | -Y                  | -Y             | -NTTNFHH                         | -CG    | - | -LEPN         | -DDIVN  | -N  | -NR |
| 32 | EINI1730   | Punctularia strigosozonata      | -P                  | -Y             | -YTDGDFHH                        | -CG    | - | -LEPG         | -DDIVN  | -D  | -NA |
| 32 | PIL33242   | Ganoderma sinense               | -Y                  | -Y             | -QNQDFHS                         | -CR    | - | -             | -HGINN  | -N  | -NA |
| 32 | KZT18190   | Neolentinus lepideus            | -Y                  | -Y             | -QYQDFHH                         | -CG    | - | -LEPG         | -DDIVD  | -R  | -NR |
| 32 | KZY75308   | Peniophora sp. CONT             | -Y                  | -Y             | -QAQDFHH                         | -CG    | - | -LEPG         | -DDIVN  | -G  | -NR |
| 32 | KII86838   | Plicaturopsis crispa            | -Y                  | -Y             | -NTTNFHH                         | -CG    | - | -LEPN         | -DDIVN  | -N  | -NR |
| 32 | KDQ80818   | Botryobasidium botryosum        | -Y                  | -Y             | -QNDNFHH                         | -CG    | - | -LEPG         | -DDIVN  | -K  | -NR |
| 32 | KIY73061   | Cylindrobasidium torrendii      | -Y                  | -Y             | -TTDDFHH                         | -CG    | - | -LTSG         | -DDIVD  | -T  | -SR |
| 32 | KZW01365   | Exidia glandulosa               | -Y                  | -Y             | -THDSFHH                         | -CG    | - | -LEPG         | -DDIVN  | -D  | -NR |
| 32 | KDQ58178   | Jaapia argillacea               | -Y                  | -Y             | -SNSDFHH                         | -CG    | - | -LEPG         | -DDIVD  | -T  | -KR |
| 32 | KZY75307   | Peniophora sp. CONT             | -Y                  | -Y             | -QAQDFHH                         | -CG    | - | -LEPN         | -DDIVN  | -D  | -NA |
| 32 | KIK51212   | Gymnopus luxurians              | -Y                  | -Y             | -QSDDFHH                         | -CG    | - | -LETD         | -DDIVN  | -F  | -DR |
| 32 | RDX41931   | Polyporus brumalis              | -Y                  | -Y             | -QNQDFHH                         | -CG    | - | -LEPG         | -DDIVN  | -N  | -DA |
| 32 | TBU29254   | Dichomitus squalens             | -Y                  | -Y             | -QSDDFHH                         | -CR    | - | -HGIDQ        | -N      | -NA | -NA |
| 32 | KIY45802   | Fistulina hepatica              | -Y                  | -Y             | -SGDFHH                          | -CG    | - | -TEGD         | -AIVD   | -S  | -NA |
| 32 | KIL59382   | Amanita muscaria                | -Y                  | -Y             | -QYNDFHH                         | -CG    | - | -VEPY         | -DDIKN  | -T  | -NR |
| 32 | KIY53725   | Fistulina hepatica              | -Y                  | -Y             | -DSDNFHH                         | -CG    | - | -TTDN         | -DIED   | -N  | -NV |
| 32 | KIY47132   | Fistulina hepatica              | -Y                  | -Y             | -GVQDFHH                         | -CP    | - | -PVNG         | -SIAMD  | -G  | -NR |
| 32 | RPO55342   | Lentinus tigrinus               | -Y                  | -Y             | -NTTNFHH                         | -CG    | - | -HGINN        | -N      | -NA | -NA |
| 32 | TCB61445   | Steccherinum ochraceum          | -W                  | -Y             | -DTSNFHH                         | -CG    | - | -TPG          | -NDIQD  | -Q  | -SR |
| 32 | KIM25602   | Serendipita vermifera           | -Y                  | -Y             | -QTQDFHH                         | -CG    | - | -LAPD         | -DDIND  | -T  | -SR |
| 32 | EJD37603   | Auricularia subglabra           | -Y                  | -Y             | -TTDSFHH                         | -CG    | - | -LAPG         | -DDIAD  | -D  | -NR |
| 32 | KZT54766   | Calocera cornea                 | -Q                  | -Y             | -FNNFHH                          | -CG    | - | -LEPN         | -DVIAN  | -N  | -NR |
| 32 | KIY46805   | Fistulina hepatica              | -Y                  | -Y             | -TTDDFHH                         | -CN    | - | -SPGG         | -QIQD   | -N  | -NE |
| 32 | PPQ69654   | Psilocybe cyanescens            | -Y                  | -Y             | -QYQDFHH                         | -CG    | - | -LQSG         | -DDIVN  | -S  | -NR |
| 32 | KZQ93971   | Calocera viscosa                | -Q                  | -Y             | -FDNFHH                          | -CG    | - | -LEPN         | -DDIVN  | -D  | -NR |
| 32 | KZP07860   | Fibularhizoctonia sp CBS_109695 | -P                  | -W             | -VADNFHH                         | -CG    | - | -DNDGSGDSMWDD | -T      | -NR | -NR |
| 32 | PVG03687   | Serendipita vermifera           | -Y                  | -Y             | -QVQDFHH                         | -CG    | - | -LAPN         | -DDIQD  | -S  | -NR |
| 32 | EIM87674   | Stereum hirsutum                | -P                  | -Y             | -TSSSFHH                         | -CN    | - | -GANG         | -AKDISN | -D  | -NA |
| 32 | CCA69087   | Serendipita indica              | -Y                  | -Y             | -SANDFHH                         | -CG    | - | -LTFD         | -NNIAD  | -T  | -NR |
| 32 | CEL62035   | Rhizoctonia solani              | -Y                  | -Y             | -NNNDFHH                         | -CG    | - | -LTNN         | -DDIQD  | -G  | -DN |
| 32 | EIM05398   | Punctularia strigosozonata      | -Y                  | -Y             | -SSDFHH                          | -CG    | - | -T-TG         | -DAILD  | -S  | -NR |
| 32 | EJU02896   | Dacryopinax primogenitus        | -Q                  | -Y             | -YQDFHH                          | -CG    | - | -ISSE         | -LPLVFN | -D  | -NR |
| 32 | KIO30302   | Tulasnella calospora            | -C                  | -Y             | -L-TD                            | -L     | - | -EDSD         | -GDHID  | -T  | -NR |
| 32 | CEL62036   | Rhizoctonia solani              | -Y                  | -Y             | -GWNDFHH                         | -CG    | - | -T-NN         | -DDIQD  | -D  | -DR |
| 32 | KIO24533   | Tulasnella calospora            | -Y                  | -Y             | -DKNDFHH                         | -CG    | - | -TP-G         | -NDIQD  | -N  | -DR |
| 32 | EIM84100   | Stereum hirsutum                | -Y                  | -Y             | -SSYDFHH                         | -CG    | - | -TD-G         | -DAILD  | -S  | -NR |
| 32 | KDM35973   | Rhizoctonia solani              | -Y                  | -Y             | -EMDFHH                          | -CG    | - | -NPPG         | -DDISD  | -S  | -NR |
| 32 | KIY48489   | Fistulina hepatica              | -Y                  | -Y             | -NSTDFHH                         | -CG    | - | -TT-D         | -DAILD  | -S  | -NR |
| 32 | KIY48486   | Fistulina hepatica              | -Y                  | -Y             | -DSSDFHH                         | -CG    | - | -TT-D         | -DAIED  | -S  | -NR |
| 32 | KZP26813   | Fibularhizoctonia sp CBS_109695 | -P                  | -Y             | -TQSDFHH                         | -VC    | - | -SLDD         | -N      | -NS | -NR |
| 32 | KDQ32476   | Pleurotus ostreatus             | -Y                  | -Y             | -SYQDFHH                         | -CG    | - | -SSDE         | -VIHD   | -R  | -NR |
| 32 | EIM84087   | Stereum hirsutum                | -Y                  | -Y             | -SPEHFFHH                        | -CG    | - | -TK-G         | -DGIED  | -S  | -DK |
| 32 | KDQ32475   | Pleurotus ostreatus             | -Y                  | -Y             | -SYQDFHH                         | -CG    | - | -TPNN         | -DILN   | -T  | -NR |
| 32 | EQ88347    | Chaetomium globosum             | -P                  | -F             | -QSDDFHH                         | -CT    | - | -SQISD        | -V      | -NA | -NR |
| 32 | ORY89754   | Leucosporidium creatinivorum    | -P                  | -F             | -TSSDFHH                         | -V     | - | -             | -       | -   | -NR |
| 32 | EW234052   | Fusarium oxysporum              | -L                  | -Y             | -SFFDFDD                         | -CT    | - | -SGVRD        | -S      | -DR | -NR |
| 32 | OBT91518   | Pseudogymnoascus verrucosus     | -L                  | -Y             | -SSYDFDD                         | -CT    | - | -AQVSN        | -A      | -DR | -NR |
| 32 | KEY73157   | Stachybotrys chartarum          | -L                  | -Y             | -SSYDFDD                         | -CT    | - | -SQINN        | -A      | -DR | -NR |
| 32 | OBT62577   | Pseudogymnoascus sp 23342_1_11  | -L                  | -Y             | -SSSDFDD                         | -CT    | - | -SAVSN        | -A      | -DR | -NR |
| 32 | BOM97874   | Phaeoacremonium minimum         | -L                  | -Y             | -SSYDFDD                         | -CT    | - | -SDINN        | -G      | -DR | -NR |
| 32 | GAT55198   | Mycena chlorophos               | -Y                  | -Y             | -HEMFHH                          | -CG    | - | -GTVA         | -ATITD  | -T  | -NR |
| 32 | OAG04271   | Paraphaeosphaeria sporulosa     | -L                  | -Y             | -SFYDFDD                         | -CT    | - | -SQNTN        | -V      | -DR | -NR |
| 32 | EGG02960   | Melampsora larii populina       | -Y                  | -Y             | -DYHDFHH                         | -CG    | - | -RNGN         | -DHISD  | -T  | -DR |
| 32 | EGG02993   | Melampsora larii populina       | -Y                  | -Y             | -NFSDFHH                         | -CG    | - | -RNGN         | -DGVIN  | -T  | -DR |
| 32 | OAV91411   | Puccinia trititica              | -Y                  | -Y             | -TRNNFHH                         | -CR    | - | -KRGN         | -LEISN  | -K  | -DR |
| 32 | EPF79978   | Puccinia graminis               | -Y                  | -Y             | -TRNNFHH                         | -CR    | - | -KRGN         | -LEISN  | -M  | -NR |
| 32 | GAT51088   | Mycena chlorophos               | -P                  | -Y             | -TASQFHH                         | -CN    | - | -GANG         | -ABISD  | -T  | -NR |
| 32 | KNE94052   | Puccinia striiformis            | -Y                  | -Y             | -                                | -SR    | - | -KRGN         | -LEISN  | -M  | -DR |
| 32 | KN254553   | Puccinia sorghi                 | -AASV               | -VAMRS         | -                                | -      | - | -P-TT         | -TVTS   | -   | -NR |
| 32 | AOF40721   | Microbacterium aurum            | NCANWGVPMGY-SARGYTL | YNCQWPNATSGMFP | -KEIFHQ                          | -      | - | -CWIGN        | -EG     | -EG | -NR |
| 32 | CAB06816</ |                                 |                     |                |                                  |        |   |               |         |     |     |

[illegible]



|                                                | CSR-V                                                                            | CSR-II  | CSR-III                    |
|------------------------------------------------|----------------------------------------------------------------------------------|---------|----------------------------|
| 32_BAC73693 <i>Streptomyces avermitilis</i>    | -ANV-----QNCVLGVADLDTGE-EYVRKTIAGYMNTLL-GYAGDGGVAAVHHPA-DL-ANIKSRITNP-----SV     | MSR-VII | MSR-VII-ASGE--AVQPEYTG--NG |
| 32_CAA40798 <i>Streptomyces griseus</i>        | -ANV-----QNCVLGVADLDTGE-PYVRDIAAYINDLL-LGVGSGRDAAKMPAA-DL-TAIKAKVNGP--ST         | MSR-VII | MSR-VII-GAGE--AVQPEYTG--TG |
| 32_AAA26698 <i>Streptomyces hygroscopicus</i>  | -DDV-----QTCVLVDLADLTGS-DYVRTIAAGYGLR-SLGVGSGRDAAKHISAT-DL-AAVKRGKMDP--G         | MSR-VII | MSR-VII-GAGE-AVRDEYTG--IG  |
| 32_AAA88554 <i>Streptomyces linosus</i>        | -ANV-----QNCVLGVADLDTGE-SYVDRIAIAYINDLL-SLGVGSGRDAAKMPAA-DL-TAIKAKVNGP--ST       | MSR-VII | MSR-VII-GAGE-AVRDEYTG--TG  |
| 32_CAB06622 <i>Streptomyces lividans</i>       | -FNV-----QCEVLGVADLDTGE-AYVRKIAIAYINDLL-SLGVGSGRDAAKMPAA-DL-AIKSRISNP--SV        | MSR-VII | MSR-VII-GAGE-AVRDEYTG--SG  |
| 32_CAB07175 <i>Streptomyces sp.</i>            | -ANV-----QNCVLGVADLDTGE-EYVRKIAIAYINDLL-SLGVGSGRDAAKMPAA-DL-AIKSRISNP--SV        | MSR-VII | MSR-VII-GAGE-AVRDEYTG--SG  |
| 32_AAA82879 <i>Streptomyces sp.</i>            | -GDN-----QNCVLGVADLDTGE-DEVRSTIAAYLDGLR-SMGVGGDAAKMPAA-DV-ALQGDERRFP--G          | MSR-VII | MSR-VII-GAGE-AVRDEYTG--TG  |
| 32_AAA26697 <i>Streptomyces thermocloaceus</i> | -ANV-----QNCVLGVADLDTGE-EYVRGTIAAGYINDLL-SLGVGSGRDAAKHIAA-DL-ANIKSRISNP--NA      | MSR-VII | MSR-VII-GAGE-PKPGEYTG--TG  |
| 32_AAB36561 <i>Streptomyces venesuae</i>       | -ANV-----QNCVLGVADLDTGE-DYVRGIAIAYINDLL-SLGVGSGRDAAKMPAA-DL-ANIKSRISNP--SV       | MSR-VII | MSR-VII-GAGE-AVRDEYTG--SG  |
| 32_ABF13430 <i>Thermobifida fusca</i>          | -MEV-----QNCVLGVADLDTGS-PYVQDIAIAYINELI-DLVAGSGRDAAKHIEG-DL-QALISLRKNVHPAA--GGGK | MSR-VII | MSR-VII-GAGE-TISTGYTH--LG  |
| 32_CAA14881 <i>Thermomonas curvata</i>         | -MEV-----QNCVLGVADLDTGS-PYVQDIAIAYINELI-DLVAGSGRDAAKHIEG-DL-QALISLRKNVHPAA--GGGK | MSR-VII | MSR-VII-GAGE-TISTGYTH--LG  |
| 32_BAV06949 <i>Pholiota microspora</i>         | -LEV-----QTCELNVLADLDTGE-EYVRGLAAYINDLL-SLGVGSGRDAAKHINTS-DL-ANITSRITLT--KP      | MSR-VII | MSR-VII-GAGE-ITPAQYTG--NG  |
| 32_CAB07175 <i>Streptomyces sp.</i>            | -LEV-----QTCELNVLADLDTGE-EYVRGLAAYINDLL-SLGVGSGRDAAKHINTS-DL-ANITSRITLT--KP      | MSR-VII | MSR-VII-GAGE-ITPAQYTG--NG  |
| 32_KDB78015 <i>Geletrix marginata</i>          | -LEV-----QTCELNVLADLDTGE-EYVRGLAAYINDLL-SLGVGSGRDAAKHINTS-DL-ANITSRITLT--KP      | MSR-VII | MSR-VII-GAGE-ITPAQYTG--NG  |
| 32_PP083160 <i>Palcioybe cyaneusens</i>        | -LEV-----QTCELNVLADLDTGE-EYVRGLAAYINDLL-SLGVGSGRDAAKHINTS-DL-ANITSRITLT--KP      | MSR-VII | MSR-VII-GAGE-ITPAQYTG--NG  |
| 32_KT832361 <i>Moniliophthora rozeri</i>       | -LEV-----QTCELNVLADLDTGE-EYVRGLAAYINDLL-SLGVGSGRDAAKHINTS-DL-ANITSRITLT--KP      | MSR-VII | MSR-VII-GAGE-ITPAQYTG--NG  |
| 32_KD030003 <i>Pleurotus ostreatus</i>         | -LEV-----QTCELNVLADLDTGE-EYVRGLAAYINDLL-SLGVGSGRDAAKHINTS-DL-ANITSRITLT--KP      | MSR-VII | MSR-VII-GAGE-ITPAQYTG--NG  |
| 32_RDX41646 <i>Polyporus brumalis</i>          | -LEV-----QTCELNVLADLDTGE-EYVRGLAAYINDLL-SLGVGSGRDAAKHINTS-DL-ANITSRITLT--KP      | MSR-VII | MSR-VII-GAGE-ITPAQYTG--NG  |
| 32_OJT13448 <i>Trametes pubescens</i>          | -LEV-----QTCELNVLADLDTGE-EYVRGLAAYINDLL-SLGVGSGRDAAKHINTS-DL-ANITSRITLT--KP      | MSR-VII | MSR-VII-GAGE-ITPAQYTG--NG  |
| 32_OJT13448 <i>Trametes pubescens</i>          | -LEV-----QTCELNVLADLDTGE-EYVRGLAAYINDLL-SLGVGSGRDAAKHINTS-DL-ANITSRITLT--KP      | MSR-VII | MSR-VII-GAGE-ITPAQYTG--NG  |
| 32_KIM37797 <i>Hebeloma cylindrosporum</i>     | -LEV-----QTCELNVLADLDTGE-EYVRGLAAYINDLL-SLGVGSGRDAAKHINTS-DL-ANITSRITLT--KP      | MSR-VII | MSR-VII-GAGE-ITPAQYTG--NG  |
| 32_PBK61492 <i>Armillaria solidipes</i>        | -AQQ-----QTCQLGGLADLATE-EYVRGLAAYINDLL-SLGVGSGRDAAKHIAA-DL-ANITSRIFS--SF         | MSR-VII | MSR-VII-GAGE-AVRDEYTG--TG  |
| 32_ETW67638 <i>Heterobasidion irregulare</i>   | -LEV-----QTCQLNVLADLDTGE-EYVRGLAAYINDLL-SLGVGSGRDAAKHIAA-DL-ANITSRIFS--SF        | MSR-VII | MSR-VII-GAGE-AVRDEYTG--TG  |
| 32_RDB27268 <i>Hypsizygus marmoreus</i>        | -VQV-----QTCVLNVLADLDTGE-EYVRGLAAYINDLL-SLGVGSGRDAAKHIASG-DL-SNITGLRSLA--AP      | MSR-VII | MSR-VII-GAGE-PQPEYTG--TG   |
| 32_PP071147 <i>Gymnopilus dilepis</i>          | -LEV-----QTCQLNVLADLDTGE-EYVRGLAAYINDLL-SLGVGSGRDAAKHIASG-DL-SNITGLRSLA--AP      | MSR-VII | MSR-VII-GAGE-PQPEYTG--TG   |
| 32_OSD07016 <i>Trametes coccinea</i>           | -LEV-----QTCQLNVLADLDTGE-EYVRGLAAYINDLL-SLGVGSGRDAAKHIASG-DL-SNITGLRSLA--AP      | MSR-VII | MSR-VII-GAGE-PQPEYTG--TG   |
| 32_KIM07136 <i>Trametes glaucopertus</i>       | -LEV-----QTCQLNVLADLDTGE-EYVRGLAAYINDLL-SLGVGSGRDAAKHIASG-DL-SNITGLRSLA--AP      | MSR-VII | MSR-VII-GAGE-PQPEYTG--TG   |
| 32_KIM58535 <i>Trametes versicolor</i>         | -LEV-----QTCQLNVLADLDTGE-EYVRGLAAYINDLL-SLGVGSGRDAAKHIASG-DL-SNITGLRSLA--AP      | MSR-VII | MSR-VII-GAGE-PQPEYTG--TG   |
| 32_SJL11930 <i>Armillaria ostryae</i>          | -AQQ-----QTCQLGGLADLATE-EYVRGLAAYINDLL-SLGVGSGRDAAKHIAA-DL-ANITSRIFS--SF         | MSR-VII | MSR-VII-GAGE-AVRDEYTG--TG  |
| 32_PAV18085 <i>Pyrrhoderma noxium</i>          | -LEV-----QTCQLVGLADLDTGE-EYVRGLAAYINDLL-SLGVGSGRDAAKHIAA-DL-ANITSRING--AP        | MSR-VII | MSR-VII-GAGE-ITPAQYTG--TG  |
| 32_RP065356 <i>Lentinus tigrinus</i>           | -LEV-----QTCVLNVLADLDTGE-EYVRGLAAYINDLL-SLGVGSGRDAAKHIAA-DL-ANITSRING--AP        | MSR-VII | MSR-VII-GAGE-ITPAQYTG--TG  |
| 32_PBK84681 <i>Armillaria gallica</i>          | -AQQ-----QTCQLGGLADLATE-EYVRGLAAYINDLL-SLGVGSGRDAAKHIAA-DL-ANITSRIFS--SF         | MSR-VII | MSR-VII-GAGE-AVRDEYTG--TG  |
| 32_KL018298 <i>Schizophora paradoxa</i>        | -LEV-----QTCQLGGLADLATE-EYVRGLAAYINDLL-SLGVGSGRDAAKHIAA-DL-ANITSRIFS--SF         | MSR-VII | MSR-VII-GAGE-AVRDEYTG--TG  |
| 32_KIM07136 <i>Trametes glaucopertus</i>       | -LEV-----QTCQLVGLADLDTGE-EYVRGLAAYINDLL-SLGVGSGRDAAKHIAA-DL-ANITSRING--AP        | MSR-VII | MSR-VII-GAGE-ITPAQYTG--TG  |
| 32_KIK53844 <i>Stropharia luxurians</i>        | -QEV-----QTCQLGGLADLATE-EYVRGLAAYINDLL-SLGVGSGRDAAKHIAA-DL-ANITSRIFS--SF         | MSR-VII | MSR-VII-GAGE-AVRDEYTG--TG  |
| 32_KIJ56431 <i>Sphaerobolus stellatus</i>      | -LEV-----QTCQLNVLADLATE-EYVRGLAAYINDLL-SLGVGSGRDAAKHIAA-DL-ANITSRIFS--SF         | MSR-VII | MSR-VII-GAGE-AVRDEYTG--TG  |
| 32_EJ007843 <i>Fomitiporia mediterranea</i>    | -LEV-----QTCQLNVLADLATE-EYVRGLAAYINDLL-SLGVGSGRDAAKHIAA-DL-ANITSRIFS--SF         | MSR-VII | MSR-VII-GAGE-AVRDEYTG--TG  |
| 32_EP053992 <i>Gloeophyllum trabeum</i>        | -TEV-----QVCQLGGLADLDTGE-EYVRGLAAYINDLL-SLGVGSGRDAAKHIAA-DL-ANITSRIFS--SF        | MSR-VII | MSR-VII-GAGE-AVRDEYTG--TG  |
| 32_KIP11288 <i>Phlebiopsis gigantea</i>        | -AQQ-----QTCQLGGLADLATE-EYVRGLAAYINDLL-SLGVGSGRDAAKHIAA-DL-ANITSRIFS--SF         |         |                            |

AA854466 *Paenibacillus polymyxa*  
AA949445 *Thermactinomyces vulgaris*  
BADO6003 *Aspergillus awamori*  
BADO6002 *Aspergillus awamori*  
AF414264 *Aspergillus flavus*  
BADO1051 *Aspergillus kawachii*  
BADO2293 *Aspergillus kawachii*  
EAA64850 *Aspergillus nidulans*  
AAFI7100 *Aspergillus nidulans*  
P56271 *Aspergillus niger*  
CAK44871 *Aspergillus niger*  
CAK0949 *Aspergillus niger*  
CAK1088 *Aspergillus niger*  
CAK31218 *Aspergillus oryzae*  
CAA1255 *Aspergillus shiroyensis*  
AEBB0431 *Aspergillus tubingensis*  
BAL12010 *Cryptococcus sp. S 2*  
ABG44872 *Pisicoccum sp. BC4214*  
AAQ12212 *Lipomyces spencermartinsiae*  
AAQ49622 *Lipomyces spencermartinsiae*  
AAN75021 *Lipomyces starkeyi*  
AFD54462 *Malbranchea cinnamomea*  
ABF72529 *Ophiostoma floccosum*  
EPF82625 *Penicillium oxalicum*  
ABG42285 *Phanerochaete chrysosporium*  
BAF15173 *Phialocephala blanda*  
BAF98616 *Pichia burtonii*  
AGJ52081 *Rhizomucor pusillus*  
ADL82123 *Rhizopus oryzae*  
ADL80242 *Saccharomyces fibuliger*  
ABF44067 *Saitozysa flava*  
ABG14771 *Schwiebia schenckii*  
BAF40006 *Schwiebia schenckii*  
CAA34162 *Schwannomyces occidentalis*  
AA51912 *Schwannomyces occidentalis*  
ACN82436 *Sclerotinia sclerotiorum*  
CAA31310 *Thermomyces lanuginosus*  
ABG69580 *Trichoderma viride*  
VAL21046 *Valentinomyces coccos*  
AMX66236 *Alcalyviobacillus sp. 18711*  
AAQ16765 *Alkalimonas amylolytica*  
CAL14744 *Anoxybacillus flavithermus*  
ABW07376 *Bacillus acidicola*  
AAK22191 *Bacillus amyloliquefaciens*  
ABW07376 *Bacillus amyloliquefaciens*  
CAD26699 *Bacillus halmapalae*  
AAA22226 *Bacillus licheniformis*  
AEM05860 *Bacillus licheniformis*  
AAO0598 *Bacillus megaterium*  
AGN35141 *Bacillus paralicheniformis*  
AAK22231 *Bacillus sp. 707*  
BAF03567 *Bacillus sp. JAMB. 204*  
ACS39917 *Bacillus sp. KSM K38*  
AAI18785 *Bacillus sp. MK 716*  
AAI63900 *Bacillus sp. TS. 23*  
ABW87262 *Bacillus sp. YK\_YK1*  
ABW05067 *Bacillus sp. YK\_YK2*  
AFD74994 *Excherichia coli*  
AFZ41193 *Exiguobacterium sp. DAU5*  
AAK22235 *Geobacillus stearothermophilus*  
BAK38871 *Geobacillus thermodentificans*  
AFC87833 *Geobacillus thermoleovorans*  
ACD17732 *Halothemophilus oreii*  
AFC87833 *Halothemophilus oreii*  
AAK27110 *Salmonella typhimurium*  
BAA24178 *Streptococcus equinus*  
AAK97431 *Streptococcus equinus*  
AAIN59233 *Streptococcus mutans*  
C0D30600 *uncultured bacterium*  
ABP73597 *Vibrio cholerae*  
ABG62854 *Histoplasma capsulatum*  
ABSI1196 *Paracoccidioides brasiliensis*  
BAW15172 *Pholiota microspora*  
AAB60935 *Aedes aegypti*  
AAB60934 *Aedes aegypti*  
AAK03322 *Aedes atropalpis*  
AAK03323 *Anopheles gambiae*  
AAW77138 *Anthonomus grandis*  
AAW77139 *Anthonomus grandis*  
AAK33755 *Asterias rubens*  
AYX23288 *Battellata germanica*  
BAF72257 *Diabrobruchus chinensis*  
AAK03350 *Culex quinquefasciatus*  
AAT20998 *Callosotoma virgifer*  
AAT20998 *Callosotoma virgifer*  
AAC35243 *Drosophila ananassae*  
BAB91544 *Drosophila bocki*  
BAK04582 *Drosophila erecta*  
BAB91509 *Drosophila kikkawai*  
BAK95437 *Drosophila leontia*  
BAB95441 *Drosophila melanogaster*  
BAK95438 *Drosophila mauritiana*  
AAK93479 *Drosophila melanogaster Amyrel*  
BAK28238 *Drosophila melanogaster*  
AAC46839 *Drosophila pseudoobscura*  
BAK04585 *Drosophila schellia*  
AAK46465 *Drosophila yakuba*  
AAG60011 *Drosophila yakuba*  
CAK76926 *Phaeodon cochleariae*  
P56634 *Tenebrio molitor*  
AAK03708 *Tribolium castaneum*  
AAT73435 *Zabrotes subfasciatus*  
ABU09513 *Acarus siro*  
BAB85635 *Actinotrichia japonica*  
AAL37207 *Crassostrea gigas*  
AAL37183 *Crassostrea gigas*  
AAD38942 *Dermatophagoides pteronyssinus*  
AAD38943 *Euroglyphus maynei*  
AAC60246 *Gallus gallus*  
AAC60246 *Gallus gallus*  
BAM74656 *Haemaphysalis bancrofti*  
AAH51724 *Homo sapiens pancreatic*  
AAH51728 *Homo sapiens pancreatic*  
AAK37221 *Mus musculus*  
AAL37230 *Mus musculus*  
AH2N004 *Mus musculus latipes*  
CAK68065 *Pectinotransversarius*  
CAA54254 *Panueus vannamei*  
CAB65552 *Panueus vannamei*  
AAT65827 *Pseudopleuronectes americanus*  
AAH08228 *Rattus norvegicus*  
AAH08228 *Rattus norvegicus*  
AAT68025 *Struthio camelus*  
AAT68028 *Sus scrofa*  
CAC87125 *Tetraodon nigroviridis*  
AAK21016 *Aeromonas hydrophila*  
BAA22082 *Bacillus sp. 195*  
AAJ989038 *Bifidobacterium breve*  
CAB92963 *Salmonas meridiana*  
AAK57278 *Salmonas meridiana*  
AKG25402 *Microbacterium aurum*  
CAK14481 *Pseudocitronomonas halopantantis*  
AAB68635 *Pseudomonas sp. KF0C188*  
AAK6317 *Streptomyces albus*

[illegible]

32 BAC73693 Streptomyces avermitilis DV-Q--EFRYAYDLKR-----VFNN-----E-NLA-LK  
32 CAA40798 Streptomyces griseus DV-Q--EFRYARDLKR-----VFQN-----E-NLAHLK  
32 AAA26698 Streptomyces hygroscopicus DV-D--EFRYGTHLKS-----AFQS-----G-NIAQLK  
32 AAA88554 Streptomyces linoosus DV-Q--EFRYARDLKR-----VFQN-----E-NLAHLK  
32 CAB06622 Streptomyces lividans DV-Q--EFRYARDLKR-----VFNN-----E-NLA-LK  
32 CAA73775 Streptomyces sp\_T01 DV-Q--EFRYAYDLKR-----VFNN-----E-NLA-LK  
32 AAA82875 Streptomyces sp\_WL6 DV-D--EFRYGGHLKS-----AFQG-----G-GIAQLK  
32 AAA26697 Streptomyces thermoviolaceus DV-Q--EFRYAYDLKR-----VFTQ-----E-HLA-LK  
32 AAB36561 Streptomyces venezuelae DV-Q--EFRYARDLKR-----VLQG-----E-KLS-LK  
32 ABP13430 Thermobifida fusca SV-T--EFQYHDIISH-----AFAM-----G-NIAHLT  
32 CAA41981 Thermomicrospora curvata SV-T--EFQYHDIISH-----AFAM-----G-NIAHLT  
32 BAV60949 Pholiota micropora DV-Q--EFRYTTAVQQ-----TFSS-----G-GISMLQN  
32 KJA26527 Hypholoma sublateritium DV-Q--EFRYTSALQS-----AFSG-----G-GISSLQN  
32 KDR78015 Galerina marginata DV-Q--EFRYTSAIKS-----AFSG-----G-GISGLQN  
32 PPQ83160 Psilocybe cyanescens DV-Q--E--YTSALKD-----AFSG-----G-GISSLQN  
32 KTB32361 Moniliophthora roreri DV-Q--EFRYTTTLKS-----TFLG-----G-GISSLQN  
32 KDQ30003 Pleurotus ostreatus DV-Q--EFRYTSELKN-----AFSG-----G-GISLQN  
32 RDX41646 Polyporus brumalis DV-Q--EFRYTSLKQ-----SFLG-----G-TISMLQS  
32 OJT13448 Trametes pubescens DV-Q--EFRYTSALKD-----AFSS-----S-GISMLQD  
32 PFH45132 Amanita thiersii DV-Q--EFRYTTALRD-----AFSG-----G-GISSLQN  
32 KIM37787 Hebeloma cylindrosporum DV-Q--EFRYTTALKD-----AFSG-----Q-GISSLQN  
32 PRK61492 Armillaria solidipes DV-Q--EFRYTTALQS-----AFGG-----G-SISGLN  
32 ETW76368 Heterobasidium irregulare DV-Q--EFRYTTALQD-----AFSS-----S-GISGLQN  
32 RDB27268 Posticiporia mediterranea DV-Q--EFRYTSLARD-----AFGL-----G-GISMLQ  
32 PPQ71147 Gymnopilus dilepis DV-Q--EFRYTTLMN-----AFLN-----N-GIASLQN  
32 OSD07916 Trametes coccinea N-----EFRYTTALKN-----AFGL-----G-GISSLQS  
32 KZW01389 Exidia glandulosa DV-Q--EFRYTSALKD-----AFQS-----N-GISSLQN  
32 EIW55835 Trametes versicolor DV-Q--EFRYTSALKD-----AFSG-----S-GISSLQD  
32 SJU11930 Armillaria ostoyae DV-Q--EFRYTTALQS-----AFGG-----G-SISGLN  
32 BAV18085 Pyrrhoderma noxium DV-Q--EFRYTTAVQN-----GFLS-----D-GISGLQN  
32 RPO65356 Lentinus tigrinus DV-Q--EFRYTSLKQ-----SFLG-----G-TISMLQS  
32 PRK84861 Armillaria gallica DV-Q--EFRYTTALQT-----AFTG-----G-SISGLN  
32 KLO18298 Schizopora paradoxa DV-M--EFRYTTALLN-----SFLG-----SNGANISGLQD  
32 PPR08271 Panaeolus cyanescens DV-Q--EFRYTSAVRD-----AFSG-----N-GDGIASLQS  
32 KIK53845 Gymnopus luxurians NV-Q--EFRYTTALFN-----AFSG-----G-GISMLQN  
32 KIJ56431 Sphaerobolus stellatus DV-Q--EFRYTSTLQS-----AFSG-----S-QALSSLQN  
32 EJD07843 Posticiporia mediterranea DV-Q--EFRYTTALKD-----AFGL-----G-GIASLQN  
32 EPQ53992 Gloeophyllum trabeum DA-Q--EFRYTTALKN-----AFTC-----G-GISSLED  
32 KIP11288 Phlebiopsis gigantea DV-Q--EFRYTTAFQN-----AFTN-----G-SISSLQS  
32 KIY62009 Cylindrobasidium torrendii DV-Q--EFRYTSTVRD-----AFNN-----G-DISGLRD  
32 KIJ69360 Hydnomerulius pinastri DV-M--EFRYTSALQT-----GFSG-----G-GINTLEN  
32 KZT20455 Neolentinus lepideus DA-Q--EFRYTTALQN-----AFTD-----T-GISGLKD  
32 RGM97351 Serpula lacrymans var lacrymans DV-M--EFRYTSALQS-----AFGG-----G-GISSLQD  
32 KDQ60010 Botryobasidium botryosum DV-Q--EFRYTTALKD-----AFGL-----G-GINTLQK  
32 PPR00074 Panaeolus cyanescens DV-Q--EFRYTSALKD-----AFQN-----G-NIASLQN  
32 EKM53319 Phanerochaete carnosia DV-Q--EFRYTTAVQN-----AFSG-----S-GISGLQS  
32 TBU45601 Dichomitus squalens DV-Q--EFRYTTALKN-----AFGL-----G-GISSLES  
32 PSR82077 Phlebia centrifuga -----VFNN-----E-NLA-LK  
32 KIM89391 Piloderma croceum SV-Q--EFRYTNSLKD-----AFGL-----G-GISSLEN  
32 PIL31175 Galerina marginata DV-Q--EFRYTTALKD-----AFGL-----E-KISSLQS  
32 KIY70325 Cylindrobasidium torrendii NV-Q--EFRYTSTVRD-----AFNN-----D-GISGLQD  
32 KDQ58060 Jaapia argillacea DV-Q--EFRYTTALQD-----AFTS-----T-GISTLEN  
32 CEL62905 Rhizoctonia solani DV-Q--EFRYTSTIQN-----AFQS-----G-GISSLNG  
32 GAT57350 Mycena chlorophos DV-Q--EFRYTSTLKS-----AFGL-----G-GINTLQS  
32 KIM25608 Serendipita vermifera AV-Q--EFRYTSTIKD-----AFQS-----S-GISSLQN  
32 GAW02849 Lentinula edodes NV-Q--EFRYTTALQS-----AFGL-----G-GISMLN  
32 TCD63303 Steccherinum ochraceum AV-Q--EFRYTSTLQS-----AFGL-----G-GISMLRD  
32 KZP22139 Fibularhizoctonia sp\_CBS\_109695 NV-M--EFRYTTALQN-----AFTN-----G-SINSLES  
32 KII190441 Plicaturopsis crispata DV-M--EFRYTTALQT-----AFTN-----S-GISMLQN  
32 KDQ58058 Jaapia argillacea ES-V--IFRYTSALQD-----AFSY-----S-GISNLEF  
32 OCH93218 Obba rivulosa DV-Q--EFRYTSALQS-----AFTG-----G-GISSLES  
32 EMD36390 Gelatoporia subvermispora DV-Q--EFRYTSALQS-----AFTG-----G-GISSLES  
32 EIM78746 Cortophora puteana DV-M--EFRYTSALQS-----AFGL-----G-GISGLQD  
32 KII186244 Plicaturopsis crispata DV-Q--EFRYTSALQS-----AFGL-----G-GISGLQD  
32 EKM75205 Agaricus bisporus DV-Q--EFRYTTLRD-----AFSG-----G-GISSLQN  
32 KZT36083 Sistotremastrum suecicum DV-M--EPRFASTIQT-----ALSS-----S-GLSGMVN  
32 KZS90559 Sistotremastrum niveocreum DV-M--EPRFASTIQT-----ALSS-----S-GLSGMVN  
32 EFI198134 Schizophyllum commune DV-Q--EFRYTHTIQD-----AFTN-----S-GLDQLQD  
32 BRC62173 Tricholoma matsutake DV-Q--EFRYTTALKN-----AFGL-----S-SGSSSISGLQD  
32 CCA69081 Serendipita indica AV-Q--EY-----AFGL-----G-GISGLQ  
32 EFI198135 Schizophyllum commune DV-Q--EFRYTRAIQS-----AFGL-----G-GIDQLRD  
32 KII185613 Plicaturopsis crispata DA-Q--EFRYTSALKS-----AFAN-----G-AINGLQY  
32 EIN11730 Punctularia strigosozonata DV-Q--EFRYTTALQD-----AFGG-----S-GISSLED  
32 PIL33242 Ganoderma sinense DV-Q--EPRFTDALRD-----AFTH-----S-SQLSDLQN  
32 KZT18190 Neolentinus lepideus DV-Q--EFRYTFLIKD-----AFPT-----S-GIAGLQN  
32 KEV75308 Peniophora sp\_CONT DV-Q--EPRFASLKR-----AFGL-----S-GISGLQD  
32 KII186838 Plicaturopsis crispata DA-Q--EPRFASLKY-----AFGL-----G-PISGLQD  
32 KDQ80818 Botryobasidium botryosum DV-Q--EFRYTSALKS-----AFEG-----Q-GISSLPN  
32 KIY73061 Cylindrobasidium torrendii NV-Q--EFRYTSTLQS-----AFGN-----G-DISGLQD  
32 KZW01365 Exidia glandulosa NV-Q--EPRFTSTLQD-----AFSS-----G-GISS  
32 KDQ58178 Jaapia argillacea NV-Q--EFRYTTALKE-----AFSM-----T-GIAN  
32 KEV75307 Peniophora sp\_CONT NV-Q--EFRYTTTELQN-----AFGG-----S-GISALQD  
32 KIK51212 Gymnopus luxurians DV-Q--EFRYTTAVQN-----AFGL-----D-GIASLQN  
32 RDX41931 Polyporus brumalis -----AFRFDALRD-----AFTC-----K-SNLSLKD  
32 TBU29254 Dichomitus squalens HV-Q--EPRFKDALTA-----AFTG-----S-SRLSDLQN  
32 KIY45802 Fistulina hepatica DA-Q--EFGFMSAMKS-----AFEN-----D-ASTTYSLS  
32 KIL59382 Amanita muscaria DV-Q--EPRYPATLKN-----AFSS-----G-NISALQD  
32 KIY53725 Fistulina hepatica DA-Q--EPRFPFTVKA-----AFTN-----N-ETSI-SELE  
32 KIY47132 Fistulina hepatica -----MFRPPLAPLQ-----AFSN-----D-SVGL-S  
32 RPO55342 Lentinus tigrinus DV-Q--EPRFMDALRD-----AFGL-----K-SNLSLKD  
32 TCD61445 Steccherinum ochraceum DV-Q--EPRWTALQK-----AFSG-----G-GISSLQS  
32 KIM25602 Serendipita vermifera NV-Q--EPRYTQAVQS-----AFMG-----D-GIILQD  
32 EJD37603 Auricularia subglabra NV-Q--EPRYTSTLRD-----AFSGV-----SA-GIAQ  
32 KZT54766 Calocera cornea DV-Q--EPRYTSALKD-----AFLS-----S-GIAS  
32 KIY46805 Fistulina hepatica DA-Q--EPRNPTTLKN-----AFGL-----N-GATT-SQLK  
32 PPO69654 Psilocybe cyanescens DV-Q--EPRYTTALRD-----AFGL-----D-GIASLQN  
32 KZQ93971 Calocera viscosa DV-Q--EPRYTSALQN-----AFLS-----S-GIASLTS  
32 KZP07860 Fibularhizoctonia sp\_CBS\_109695 DA-Q--EPRYVWALKa-----AFGL-----S-SSSI-S  
32 PVG03687 Serendipita vermifera NV-Q--EPRYTDTLKN-----AFTE-----G-GIDS  
32 EIM87674 Stereum hirsutum DV-I--EPRVPETVLT-----YFTS-----Q-GIANMVT  
32 CCA69087 Serendipita indica AV-Q--EPRYTNLKN-----AFTE-----G-GIDT  
32 CEL62035 Rhizoctonia solani DI-Q--EPRYTPALRD-----AFNN-----N-GIAG  
32 EIM05398 Punctularia strigosozonata DV-T--VSDYQGLQK-----AFGS-----T-NIASLNG  
32 EJU02896 Dacryopinax primogenitus EYTL--LFRYTSALQS-----AFLS-----N-GIVS  
32 KIO30302 Tulasnella caloopora DV-Q--EPRYLSALKD-----AFTS-----S-NIASLANIAS  
32 CEL62036 Rhizoctonia solani DV-Q--EPRYPEALKa-----AFTG-----G-GIAG  
32 KIO24533 Tulasnella caloopora DV-Q--EPRYTSLLSN-----AFNS-----G-NIAQ  
32 EIM84100 Stereum hirsutum TV-S--VSDYQVAVET-----AFKT-----G-GIDT  
32 KDM35973 Rhizoctonia solani DV-Q--EPRFASLKR-----AFQA-----D-GIAR  
32 KIY48489 Fistulina hepatica QV-N--AFEFAYGLT-----AFLA-----D-GLTA  
32 KIY48486 Fistulina hepatica QV-N--AFEFAYMRS-----AFFY-----D-GLSA  
32 KZP26813 Fibularhizoctonia sp\_CBS\_109695 DV-M--EPRFASALQS-----AFGL-----S-GISS  
32 KDQ32476 Pleurotus ostreatus DV-Q--VFEYSKKIRE-----AFMK-----G-SFTI  
32 EIM84087 Stereum hirsutum LV-S--ASDYQDMLQK-----ALRS-----D-GLVS  
32 KDQ32475 Pleurotus ostreatus DV-H--VFDYAMEIKR-----AFLS-----G-NIAS  
32 EMB88347 Chaeospora glaberrima DV-Q--EPRFASLKR-----AFQA-----E-KLA-LK  
32 ORY89754 Leucosporidium creatinivorum GV-L--EPRARSLVS-----AFVK-----G-NGIK  
32 EW234052 Fusarium oxysporum DV-Q--EPRYAYGLKR-----VFNN-----E-KLA-LK  
32 OBT91518 Pseudogymnoascus verrucosus DV-Q--EPRYAYDLKR-----VFNS-----E-KLA-LK  
32 KEY73157 Stachybotrys chartarum DV-Q--EPRYAYDLKR-----VEDN-----E-KLA-LK  
32 OBT62577 Pseudogymnoascus sp\_23342\_1\_1 DV-Q--EPRYAYGLKS-----VFNN-----E-KLA-LK  
32 RGM97874 Phaeoacremonium minimum DV-Q--EPRYAYDLKR-----VLNS-----E-KLA-LK  
32 GAT55198 Mycena chlorophos DI-T--EPRFASLQK-----AFSG-----S-SGVSNLVT  
32 OAG04271 Paraphaeosphaeria sporulosa DV-Q--EPRYADLKP-----VFNN-----E-KLA-LK  
32 EGG02960 Melampsora larii populina NV-H--VFQASDLKR-----LFKT-----D-GMRLVH  
32 EGG02993 Melampsora larii populina NV-Q--IFQASDLKR-----LFKT-----D-GMLVQ  
32 OAV91411 Puccinia triticina RV-H--IFQAYDLKR-----MFLS-----D-GIALQD  
32 EFP79978 Puccinia graminis RV-H--IFQAYDLKR-----MFLS-----D-GIALQD  
32 GAT51088 Mycena chlorophos DV-T--EPRYXXXTTKKTKTARV-----TRLSSNQISTLAME-----S-GIANMVT  
32 KNE94052 Puccinia striformis RV-H--IFQAYDLKR-----MFLS-----D-GIALQD  
32 KN254553 Puccinia sorghii -----AYDLKR-----MFLVRLTSLWPDPFSYNGSDGIA-LGHVSTPLSTLMYTHPVLIFLASY  
32 AOP40721 Microbacterium aurum SV-N--HSAPFTTWKREYSTND-----VQAVIEQYQENLMGGDQGPSTNARLNGNHYTHPDHSQFSQMNIDMRHMNFADNASNA  
32 CAB06816 Streptomyces lividans SV-T--HSAQPTTWKREYSAAD-----AKAAALEMEYEQGGTGNQPTSANAFLENGSYHVPDHSRFSQMNIDMRHMNFADNASNA  
32 JWA81565 Pezizomyces ruminatum VV-Q--SSPLYTWNPKDYGNWYESTGDKNLEKTRQE-WTDGATPKRSNNAFLNGNHYTHPDYSEFSGLNIDFTMHHSFENANNA



| CSR-IV                                     |          |       |                | CSR-VII       |                             |             |        |
|--------------------------------------------|----------|-------|----------------|---------------|-----------------------------|-------------|--------|
| 1 AAB5446 Paenibacillus polymyxa           | RY       | SDDR  | YYRDAQTNGVFID  | RY            | KPFLNDASGKPGANWDKWPQLKAALGF | TL          | TSR    |
| 1 CAA49465 Thermactinomyces vulgaris       | RY       | AQDY  | RYNNMTNGLFID   | RY            | PRFLNEASGKPGASNDKWPQLKAALGF | MF          | TTR    |
| 1 BAD06003 Aspergillus awamori             | MIKS     | VASDC | S-DPTLLGNFID   | MIKS          | PRFASVTSYD                  | YSQAKNVLSY  | IF     |
| 1 BAD06002 Aspergillus awamori             | MIKS     | VASDC | S-DPTLLGNFID   | MIKS          | PRFASVTSYD                  | YSQAKNVLSY  | IF     |
| 1 AAF14264 Aspergillus flavus              | MINT     | VKSDC | P-DSTLLGTFTV   | MINT          | PRFASYTND                   | IALAKNVAAP  | II     |
| 1 BAD01051 Aspergillus kawachii            | MINT     | VKSDC | P-DSTLLGTFTV   | MINT          | PRFASYTND                   | IALAKNVAAP  | II     |
| 1 BAA22993 Aspergillus kawachii            | MIKS     | VASDC | S-DPTLLGNFID   | MIKS          | PRFASVTSYD                  | YSQAKNVLSY  | IF     |
| 1 EAA64850 Aspergillus nidulans            | MIET     | VKYTC | S-DATLLGNFID   | MIET          | PRFASYTDD                   | ISLAKNVAAP  | VI     |
| 1 AAF17100 Aspergillus nidulans            | MINT     | VASNC | R-DPTLLGNFID   | MINT          | PRFPNTYTD                   | MSRAKNVLAAP | LF     |
| 1 P56271 Aspergillus niger                 | MIKS     | VASDC | S-DPTLLGNFID   | MIKS          | PRFASYTSD                   | YSQAKNVLSY  | IF     |
| 1 CAA44871 Aspergillus niger               | MIKS     | VASDC | S-DPTLLGNFID   | MIKS          | PRFASYTSD                   | YSQAKNVLSY  | IF     |
| 1 CAA40249 Aspergillus niger               | QVQS     | MMKNC | N-DVTALLSFSFID | QVQS          | ARFASMTDD                   | MLAKNLTFT   | TL     |
| 1 CAA41088 Aspergillus niger               | ELAT     | INDLC | P-DTFAMVNFID   | ELAT          | DRWAMNDD                    | IMLAKTALT   | MM     |
| 1 CAA32128 Aspergillus oryzae              | MINT     | VKSDC | P-DSTLLGTFTV   | MINT          | PRFASYTND                   | IALAKNVAAP  | II     |
| 1 BAA01255 Aspergillus shirousami          | MINT     | VKSDC | P-DSTLLGTFTV   | MINT          | PRFASYTND                   | IALAKNVAAP  | II     |
| 1 ABEB0431 Aspergillus tubingensis         | MIKS     | VASDC | S-DPTLLGNFID   | MIKS          | PRFASYTSD                   | YSQAKNVLSY  | IF     |
| 1 BAA12010 Cryptococcus sp. S.2            | GISA     | MSQDC | S-DPTLLGSFID   | GISA          | PRFASVTSYD                  | YSQAKNVLSY  | IF     |
| 1 ABG48742 Fusicoccum sp. BCC4124          | EINT     | VKSDC | K-DPTLLGSFID   | EINT          | TRFAATSD                    | LSQAKNVLAAP | TL     |
| 1 AAO12212 Lipomyces kononenkoae           | VVKS     | EQATF | S-DAAHALTNFID  | VVKS          | PRFASYLGDGNC                | DDVLREDAAT  | LF     |
| 1 AAC49622 Lipomyces spenceriartinsiae     | MIDT     | LKSEC | T-DPTLLGSFID   | MIDT          | PRFASYTSD                   | ESLKNALAP   | TI     |
| 1 AAN75021 Lipomyces starkeyi              | MIDT     | LKSEC | T-DPTLLGSFID   | MIDT          | PRFASYTSD                   | ESLKNALAP   | TI     |
| 1 AFD54462 Malbranchea cinnamomea          | NINK     | VQTC  | N-DPRLLTFTV    | NINK          | PRFASYTDD                   | IALAKNVLAAP | II     |
| 1 ABF72529 Ophiostoma floccosum            | MIKS     | VASDC | A-DPTLLGNFID   | MIKS          | PRFASYTSD                   | YSQAKNVLSY  | IF     |
| 1 EBP56265 Phaeoacremonium aleuticum       | MINS     | VASDC | S-DPTLLGNFID   | MINS          | PRFASYTSD                   | YSQAKNVLSY  | IF     |
| 1 ABO42265 Phanerochaete chrysosporium     | MLAQ     | SKQKF | K-DPVSLLGNFID  | MLAQ          | PWRNLSVD                    | PQSLNMAVF   | NN     |
| 1 BAW15173 Pholiota microspora             | TFED     | SKTKF | K-DVGLLGNFID   | TFED          | PWRNLSVD                    | PQSLNMAVF   | NN     |
| 1 BAF98616 Pichia burtonii                 | MIDN     | ILKLC | N-DVLLGNFID    | MIDN          | IRLSTIKD                    | KALKNLAAP   | TI     |
| 1 AGJ52081 Rhizomucor pusillus             | MLGS     | NNRAF | E-DTSVLTFTV    | MLGS          | PRFLNSQSD                   | KAL         | NALTY  |
| 1 ADL28123 Rhizopus oryzae                 | FSDI     | KGNF  | K-NIDVLFNFID   | FSDI          | PRLLS-KAD                   | QSLVFNALAY  | SP     |
| 1 ADDB0242 Saccharomyces fibuliger         | MISV     | VASDC | S-DPTLLGNFID   | MISV          | PRFASMTSD                   | KSLLNLAAP   | VL     |
| 1 ABS76467 Saitoyama flava                 | MIKS     | VASDC | S-DPTLLGNFID   | MIKS          | PRFASYTSD                   | YSQAKNVLSY  | IF     |
| 1 CAA11471 Schizosaccharomyces pombe       | ANML     | VAHHC | K-DPTLLGLFID   | ANML          | PRFLNSQSD                   | YTVLKNMNTL  | NL     |
| 1 CBA40006 Schizosaccharomyces pombe       | YQEV     | MASNC | SKYDSTMLTFTV   | YQEV          | YRFPYTSYD                   | QSQIMGALSF  | VL     |
| 1 CAA34162 Schwanniomyces occidentalis     | MIST     | LQSCS | S-DVSLGNFID    | MIST          | VRFPSTYSD                   | TSLLKNMNTL  | II     |
| 1 CAA51912 Schwanniomyces occidentalis     | MISS     | LESDC | K-DITLLGNFID   | MISS          | PRFLNSQSD                   | SALKNLAAP   | NL     |
| 1 ACN82436 Sclerotinia sclerotiorum        | GINT     | MMKSC | S-DPTLLGSFID   | GINT          | PRFASYTSD                   | ESLKNALAP   | TI     |
| 1 CAA03110 Thermomyces lanuginosus         | ALAT     | VQSCC | K-DNLLGNFID    | ALAT          | ARFASMTSD                   | IALAKNVLAAP | II     |
| 1 BAG95980 Trichoderma viride              | MHRD     | L-SF  | P-DPTLLGTFTV   | MHRD          | PRFLSVND                    | TSLL        | NALTY  |
| 1 CAJ21046 Valsaria rubricosa              | NHDT     | VGSTF | S-DPTLLGNFID   | NHDT          | PRFLSVND                    | HALLKNALAY  | VI     |
| 5 AWX62636 Alicyclobacillus sp. 18711      | GGY      | DMRLN | LNNTM          | MMNHQAVTFTV   | GGY                         | QAL-QS      | W      |
| 5 AAQ01675 Alkalimonas amyloxytica         | SK       | DRMWN | GGVL           | NSQHRDRAVFTV  | SK                          | GNPYGM      | P      |
| 5 CAL14744 Anoxybacillus flavithermus      | GGY      | DMRLT | LNNTL          | MDQPTLAVTFTV  | GGY                         | QSL-QS      | W      |
| 5 ABW07376 Bacillus acididoli              | GGA      | DMRKL | MNTNL          | MDQPTLAVTFTV  | GGA                         | QSL-QS      | W      |
| 5 AAB22191 Bacillus anthracis              | GGG      | DMRLT | LNNTL          | MDQPTLAVTFTV  | GGG                         | QSL-QS      | W      |
| 5 ABY86223 Bacillus cereus                 | NGN      | DMRNI | LNNTL          | VANHPHTAVTFTV | NGN                         | QSL-ES      | V      |
| 5 CAD26699 Bacillus halmapalus             | GGA      | DMRKL | LNNTL          | VANHPHTAVTFTV | GGA                         | QSL-ES      | V      |
| 5 AAA22226 Bacillus licheniformis          | GGG      | DMRKL | LNNTL          | VANHPHTAVTFTV | GGG                         | QSL-ES      | T      |
| 5 AEM05860 Bacillus licheniformis          | GGG      | DMRKL | LNNTL          | VANHPHTAVTFTV | GGG                         | QSL-ES      | T      |
| 5 AAK00598 Bacillus megaterium             | NGN      | DMRNI | LNNTL          | VANHPHTAVTFTV | NGN                         | QSL-ES      | V      |
| 5 AKN35141 Bacillus paralicheniformis      | GGY      | DMRNI | LNNTL          | VANHPHTAVTFTV | GGY                         | QSL-ES      | V      |
| 5 AAN68734 Bacillus sp.                    | GGY      | DMRNI | LNNTL          | VANHPHTAVTFTV | GGY                         | QSL-ES      | V      |
| 5 AAA22231 Bacillus sp. 707                | GGY      | DMRNI | LNNTL          | VANHPHTAVTFTV | GGY                         | QSL-ES      | V      |
| 5 BAF03567 Bacillus sp. JAMB 204           | SGY      | DMRNL | LNNTL          | VANHPHTAVTFTV | SGY                         | QAL-ES      | T      |
| 5 CAC39917 Bacillus sp. KSM K38            | GGG      | DMRKL | LNNTL          | VANHPHTAVTFTV | GGG                         | QSL-ES      | T      |
| 5 AAB18785 Bacillus sp. MK 716             | GGA      | DMRKL | MNTNL          | MDQPTLAVTFTV  | GGA                         | QAL-QS      | W      |
| 5 AAB63900 Bacillus sp. TS 23              | SGY      | DMRNL | LNNTL          | VANHPHTAVTFTV | SGY                         | QSL-QS      | W      |
| 5 ABW07262 Bacillus sp. TX YK1             | GGG      | DMRKL | LNNTL          | VANHPHTAVTFTV | GGG                         | QSL-QS      | W      |
| 5 AAF00567 Cytophaga sp.                   | GGY      | DMRNI | LNNTL          | VANHPHTAVTFTV | GGY                         | QSL-ES      | T      |
| 5 AACT4994 Escherichia coli                | GRD      | DMTQI | FTGTL          | VEADPHAVTFTV  | GRD                         | QAL-EA      | P      |
| 5 AFZ41193 Exiguobacterium sp. DAU5        | GGY      | DMRNI | LNNTL          | VANHPHTAVTFTV | GGY                         | QSL-ES      | T      |
| 5 AAA22235 Geobacillus stearothermophilus  | GGA      | DMRKL | MNTNL          | MDQPTLAVTFTV  | GGA                         | QAL-QS      | W      |
| 5 ABX83871 Geobacillus stearothermophilus  | GGA      | DMRKL | MNTNL          | MDQPTLAVTFTV  | GGA                         | QAL-QS      | W      |
| 5 AAF087833 Geobacillus thermoleovorans    | GGG      | DMRKL | MNTNL          | MDQPTLAVTFTV  | GGG                         | QAL-QS      | W      |
| 5 AGL70572 Geobacillus thermoleovorans     | GGG      | DMRKL | MNTNL          | MDQPTLAVTFTV  | GGG                         | QAL-QS      | W      |
| 5 CAQ30277 Nostoc sp. POC 7119             | GGN      | DMRNI | LNNTL          | VANHPHTAVTFTV | GGN                         | QAL-QS      | W      |
| 5 AAA27110 Salmonella typhimurium          | GAE      | DMRNI | LNNTL          | VANHPHTAVTFTV | GAE                         | QAL-EA      | P      |
| 5 BAA24178 Streptococcus equinus           | KAB      | DLRQI | FEQTL          | VANHPHTAVTFTV | KAB                         | QAL-ES      | T      |
| 5 AAB97431 Streptococcus equinus           | KET      | DLRQI | FEQTL          | VANHPHTAVTFTV | KET                         | QAL-ES      | T      |
| 5 AAN59233 Streptococcus mutans            | GSD      | DLSTI | LDLSS          | MSHPPFAVFTV   | GSD                         | QAL-ES      | T      |
| 5 GCD30600 Streptococcus mutans            | GGG      | DMRKL | LNNTL          | VANHPHTAVTFTV | GGG                         | QAL-ES      | T      |
| 5 ALP73597 Vibrio alginolyticus            | GGG      | DMRKL | LNNTL          | VANHPHTAVTFTV | GGG                         | QAL-ES      | T      |
| 5 ABK62854 Histoplasma capsulatum          | E-FA     | DLRKY | FEGLS          | VYKREKHAFTV   | E-FA                        | QSL-EE      | P      |
| 5 ABS11196 Paracoccidioides brasiliensis   | E-GA     | DLRKY | FEGLS          | VYKREKHAFTV   | E-GA                        | QSL-EV      | P      |
| 5 BAW15172 Pholiota microspora             | RSR      | DLRKL | FEDTI          | VRARNDSTFTV   | RSR                         | RTL-ES      | P      |
| 15 AAB06935 Aedes aegypti                  | LTKNGSAG | V     | L-LP           | SSQALVFVD     | LTKNGSAG                    | SILTY       | K      |
| 15 AAB06934 Aedes aegypti                  | WG       | EQ    | G              | L-LP          | SSQALVFVD                   | SILTY       | K      |
| 15 AAA03322 Aedes aegypti                  | WG       | EQ    | G              | L-LP          | SSQALVFVD                   | SILTY       | K      |
| 15 AAA03323 Anopheles merus                | FG       | EA    | G              | L-LA          | SRDAVFVD                    | GNYC        | ILTY   |
| 15 AAN77138 Anthonomus grandis             | WG       | VG    | G              | M-AD          | GSKTAVFVD                   | SN          | SAYLNY |
| 15 AAN77139 Anthonomus grandis             | FGFDEQ   | G     | V-TA           | GEHTLCFVD     | FGFDEQ                      | NQFLNY      | K      |
| 15 AAO13755 Asterias rubens                | FG       | EA    | G              | L-LP          | ETAAVFVD                    | GNYC        | ILTY   |
| 15 AAY23288 Blattella germanica            | FG       | EA    | G              | L-LP          | ETAAVFVD                    | GNYC        | ILTY   |
| 15 BAB72257 Callosobruchus chinensis       | WG       | EA    | G              | L-LP          | ETAAVFVD                    | GNYC        | ILTY   |
| 15 AAA03350 Culex tarsalis                 | WG       | EA    | G              | L-LP          | ETAAVFVD                    | GNYC        | ILTY   |
| 15 AAF20998 Diabrotica virgifera virgifera | WG       | PQ    | G              | L-LD          | GLDAVFVD                    | SSALTY      | K      |
| 15 AIC35243 Drosophila ananassae           | WG       | TE    | A              | F-AP          | ASRSLVFVD                   | GNYC        | ILTY   |
| 15 BAB91544 Drosophila bocki               | WG       | TA    | G              | F-AA          | ASRSLVFVD                   | GNYC        | ILTY   |
| 15 BAA04582 Drosophila erecta              | WG       | TA    | G              | F-AA          | ASRSLVFVD                   | GNYC        | ILTY   |
| 15 BAB91509 Drosophila kikkawai            | WG       | TA    | G              | F-AA          | ASRSLVFVD                   | GNYC        | ILTY   |
| 15 BAB95437 Drosophila leontis             | WG       | TA    | G              | F-AA          | ASRSLVFVD                   | GNYC        | ILTY   |
| 15 BAA95441 Drosophila lini                | WG       | TA    | G              | F-AA          | ASRSLVFVD                   | GNYC        | ILTY   |
| 15 BAA04583 Drosophila mauritiana          | WG       | TA    | G              | F-AA          | ASRSLVFVD                   | GNYC        | ILTY   |
| 15 AAK93479 Drosophila melanogaster Amyrel | WG       | TD    | G              | F-LP          | SGQALVFVD                   | GNYC        | ILTY   |
| 15 CAA28238 Drosophila melanogaster        | WG       | TA    | G              | F-AA          | ASRSLVFVD                   | GNYC        | ILTY   |
| 15 AIC46839 Drosophila pseudoobscura       | WG       | AA    | G              | F-AA          | ASRSLVFVD                   | GNYC        | ILTY   |
| 15 BAA04585 Drosophila pseudoobscura       | WG       | TA    | G              | F-AA          | ASRSLVFVD                   | GNYC        | ILTY   |
| 15 AIC46463 Drosophila virilis             | WG       | TS    | G              | F-AA          | ASRSLVFVD                   | GNYC        | ILTY   |
| 15 AAG60011 Drosophila yakuba              | WG       | TA    | G              | F-AA          | ASRSLVFVD                   | GNYC        | ILTY   |
| 15 CAA76926 Phaenodactylus cochleariae     | WG       | PA    | G              | L-LE          | GTDAVFVD                    | SGALTY      | K      |
| 15 P56634 Tenebrio molitor                 | WG       | PE    | G              | L-LP          | ETAAVFVD                    | GNYC        | ILTY   |
| 15 AAO37078 Tribolium castaneum            | WG       | PE    | N              | L-LD          | GLDAVFVD                    | SSALTY      | K      |
| 15 AAF74435 Zabrotes subfasciatus          | WG       | TS    | G              | L-LP          | ETAAVFVD                    | GNYC        | ILTY   |
| 24 ABB09312 Acanthosiphum sordidum         | FG       | QF    | G              | M-VP          | SSDALVFVD                   | GNYC        | ILTY   |
| 24 BAB85635 Anguilla japonica              | WG       | EQ    | G              | F-MT          | SGNALVFVD                   | GNYC        | ILTY   |
| 24 AAL37207 Crassostrea gigas              | WG       | P     | G              | M-PN          | SNDAAVFVD                   | GNYC        | ILTY   |
| 24 AAL37183 Crassostrea gigas              | WG       | EQ    | G              | M-PN          | SNDAAVFVD                   | GNYC        | ILTY   |
| 24 AAD38942 Dermatophagoides pteronyssinus | FG       | TE    | G              | L-VP          | SGDALVFVD                   | GNYC        | ILTY   |
| 24 AAD38943 Euroglyphus maynei             | FG       | TE    | G              | L-VP          | SGDALVFVD                   | GNYC        | ILTY   |
| 24 AAC60246 Gallus gallus                  | WG       | EA    | G              | M-LK          | SDDSVFVD                    | GNYC        | ILTY   |
| 24 ABO26610 Haliothis discus discus        | WG       | SA    | G              | M-LK          | SDDSVFVD                    | GNYC        | ILTY   |
| 24 BMM74656 Haliothis discus hannah        | WG       | SA    | G              | M-LK          | SDDSVFVD                    | GNYC        | ILTY   |
| 24 AAA51724 Homo sapiens pancreatic        | WG       | EG    | G              | F-VP          | SRDALVFVD                   | GNYC        | ILTY   |
| 24 AAB63129 Homo sapiens salivary          | WG       | EG    | G              | F-MP          | SRDALVFVD                   | GNYC        | ILTY   |
| 24 AAA37221 Mus musculus                   | WG       | EG    | G              | L-MP          | SRDALVFVD                   | GNYC        | ILTY   |
| 24 AAA37230 Mus musculus                   | WG       | EG    | G              | L-VP          | SRDALVFVD                   | GNYC        | ILTY   |
| 24 B2M004 Oryzias latipes                  | WG       | EG    | G              | F-VP          | SRDALVFVD                   | GNYC        | ILTY   |
| 24 CAA68065 Pecten maximus                 | WG       | EA    | G              | M-PN          | SNDAAVFVD                   | GNYC        | ILTY   |
| 24 CAA54524 Penaeus vannamei               | FG       | EG    | G              | M-ID          | RHDAVFVD                    | GNYC        | ILTY   |
| 24 CAB65552 Penaeus vannamei               | FG       | EG    | G              | M-ID          | RHDAVFVD                    | GNYC        | ILTY   |
| 24 AAF65827 Pseudopleuronectes americanus  | WG       | EG    | G              | F-MS          | DGNAVFVD                    | GNYC        | ILTY   |
| 24 AAA40725 Rattus norvegicus              | WG       | EG    | G              | F-VP          | TRDALVFVD                   | GNYC        | ILTY   |
| 24 AAB88228 Rattus norvegicus              | WG       | EG    | G              | F-MP          | SRDALVFVD                   | GNYC        | ILTY   |
| 24 P93053 Streptococcus                    | WG       | EG    | G              | F-MP          | SRDALVFVD                   | GNYC        | ILTY   |
| 24 AAF02828 Sus scrofa                     | WG       | EG    | G              | F-MP          | SRDALVFVD                   | GNYC        | ILTY   |
| 24 CAC87125 Tetraodon nigroviridis         | WG       | EG    | G              | F-MP          | SRDALVFVD                   | GNYC        | ILTY   |
| 32 AAX20116 Aeromonas hydrophila           | LG       | ES    | G              | L-LP          | SSDALVFVD                   | GNYC        | ILTY   |
| 32 BAA22082 Bacillus sp. 195               | TLNG     | IG    | PT             | AG            | FG                          | GNYC        | ILTY   |
| 32 AAY89038 Bifidobacterium breve          | GLAK     | VG    | GDG            | W-S           | SKDAVFVD                    | GNYC        | ILTY   |
| 32 CAB92963 Bifidobacterium breve          | GLAK     | VG    | GDG            | W-S           | SKDAVFVD                    | GNYC        | ILTY   |
| 32 BAA22082 Bacillus sp. 195               | TLNG     | IG    | PT             | AG            | FG                          | GNYC        | ILTY   |
| 32 AAY89038 Bifidobacterium breve          | GLAK     | VG    | GDG            | W-S           | SKDAVFVD                    | GNYC        | ILTY   |
| 32 CAB92963 Bifidobacterium breve          | GLAK     | VG    | GDG            | W-S           | SKDAVFVD                    | GNYC        | ILTY   |
| 32 BAA22082 Bacillus sp. 195               | TLNG     | IG    | PT             | AG            | FG                          | GNYC        | ILTY   |
| 32 AAY89038 Bifidobacterium breve          | GLAK     | VG    | GDG            | W-S           | SKDAVFVD                    | GNYC        | ILTY   |
| 32 CAB92963 Bifidobacterium breve          | GLAK     | VG    | GDG            | W-S           | SKDAVFVD                    | GNYC        | ILTY   |
| 32 BAA22082 Bacillus sp. 195               | TLNG     | IG    | PT             | AG            | FG                          | GNYC        | ILTY   |
| 32 AAY89038 Bifidobacterium breve          | GLAK     | VG    | GDG            | W-S           | SKDAVFVD                    | GNYC        | ILTY   |
| 32 CAB92963 Bifidobacterium breve          | GLAK     | VG    | GDG            | W-S           | SKDAVFVD                    | GNYC        | ILTY   |
| 32 BAA22082 Bacillus sp. 195               | TLNG     | IG    | PT             | AG            | FG                          | GNYC        | ILTY   |
| 32 AAY89038 Bifidobacterium breve          | GLAK     | VG    | GDG            | W-S           | SKDAVFVD                    | GNYC        | ILTY   |
| 32 CAB92963 Bifidobacterium breve          | GLAK     | VG    | GDG            | W-S           | SKDAVFVD                    | GNYC        | ILTY   |
| 32 BAA22082 Bacillus sp. 195               | TLNG     | IG    | PT             | AG            | FG                          | GNYC        | ILTY   |
| 32 AAY89038 Bifidobacterium breve          | GLAK     | VG    | GDG            | W-S           | SKDAVFVD                    | GNYC        | ILTY   |
| 32 CAB92963 Bifidobacterium breve          | GLAK     | VG    | GDG            | W-S           | SKDAVFVD                    | GNYC        | ILTY   |
| 32 BAA22082 Bacillus sp. 195               | TLNG     | IG    | PT             | AG            | FG                          | GNYC        | ILTY   |
| 32 AAY89038 Bifidobacterium breve          | GLAK     | VG    | GDG            | W-S           | SKDAVFVD                    | GNYC        | ILTY   |
| 32 CAB92963 Bifidobacterium breve          | GLAK     | VG    | GDG            | W-S           | SKDAVFVD                    | GNYC        | ILTY   |
| 32 BAA22082 Bacillus sp. 195               | TLNG     | IG    | PT             | AG            | FG                          | GNYC        | ILTY   |
| 32 AAY89038 Bifidobacterium breve          | GLAK     | VG    | GDG            | W-S           | SKDAVFVD                    | GNYC        | ILTY   |
| 32 CAB92963 Bifidobacterium breve          | GLAK     | VG    | GDG            | W-S           | SKDAVFVD                    | GNYC        | ILTY   |
| 32 BAA22082 Bacillus sp. 195               | TLNG     | IG    | PT             | AG            | FG                          | GNYC        | ILTY   |
| 32 AAY89038 Bifidobacterium breve          | GLAK     | VG    | GDG            | W-S           | SKDAVFVD                    | GNYC        | ILTY   |
| 32 CAB92963 Bifidobacterium breve          | GLAK     | VG    | GDG            | W-S           | SKDAVFVD                    | GNYC        | ILTY   |
| 32 BAA22082 Bacillus sp. 195               | TLNG     | IG    | PT             | AG            | FG                          | GNYC        | ILTY   |
| 32 AAY89038 Bifidobacterium breve          | GLAK     | VG    | GDG            | W-S           | SKDAVFVD                    | GNYC        | ILTY   |
| 32 CAB92963 Bifidobacterium breve          | GLAK     | VG    | GDG            | W-S           | SKDAVFVD                    | GNYC        | ILTY   |
| 32 BAA22082 Bacillus sp. 195               | TLNG     | IG    | PT             | AG            |                             |             |        |

[illegible]

AA85446 *Paenibacillus polymyxa*  
CA94965 *Thermactinomyces vulgaris*  
BAD6003 *Aspergillus awamori*  
BAD6002 *Aspergillus awamori*  
AF14264 *Aspergillus flavus*  
BAD1053 *Aspergillus kawachii*  
BAD2225 *Aspergillus kawachii*  
EAA64850 *Aspergillus nidulans*  
AAFI17100 *Aspergillus nidulans*  
PS6271 *Aspergillus niger*  
CAK44871 *Aspergillus niger*  
CAK40249 *Aspergillus niger*  
CAK41088 *Aspergillus niger*  
CAK51218 *Aspergillus niger*  
BAD101255 *Aspergillus shiroyamii*  
ABE80431 *Aspergillus tubingensis*  
BAI120110 *Cryptococcus sp. S\_2*  
ABG48762 *Fusicoccum sp. BC04124*  
AAQ12212 *Lipomyces kononenkoae*  
AAQ14962 *Lipomyces kononenkoae*  
AAU75021 *Lipomyces starkeyi*  
AFD54462 *Malbranchea cinnamomea*  
ABF72529 *Ophiostoma floccosum*  
EPS26265 *Penicillium oxalicum*  
ABQ42285 *Phanerochaete chrysosporium*  
AAAI15170 *Photorhabdus luminescens*  
BAF98616 *Richiella burtonii*  
AGJ52081 *Rhizomucor pusillus*  
ADL28123 *Rhizopus oryzae*  
AD80242 *Saccharomyces fibuliger*  
ABST7467 *Saitozya flava*  
CAB11741 *Schizosaccharomyces pombe*  
CAAM006 *Schizosaccharomyces pombe*  
CA34162 *Schwanniomyces occidentalis*  
CA51912 *Schwanniomyces occidentalis*  
ACN82436 *Sclerotinia sclerotiorum*  
BA043110 *Thermomyces lanuginosus*  
BAG65890 *Trichoderma viride*  
CAI2046 *Valsaria rubicola*  
AWG66236 *Alcyonidium rubrum* sp. 18711  
AAQ161675 *Akaihalmonas amylolytica*  
CAL14744 *Acylomyxillus flavithermus*  
AEW07376 *Bacillus acidicola*  
AAAZ22191 *Bacillus amyloliquefaciens*  
ABY66223 *Bacillus cereus*  
BAD26589 *Bacillus cereus*  
AAAZ2226 *Bacillus licheniformis*  
AEM05860 *Bacillus licheniformis*  
AAK00598 *Bacillus megaterium*  
AGN35141 *Bacillus paralicheniformis*  
ABR68734 *Bacillus sp. 707*  
AAAZ2223 *Bacillus sp. 707*  
CA33567 *Bacillus* JAMB\_204  
CAC39917 *Bacillus* KSM\_K38  
ABAI18785 *Bacillus* sp. MK\_K16  
BAK63900 *Bacillus* TS\_23  
ABW87266 *Bacillus* sp. YX\_YX1  
AAU00567 *Cytophaga* sp.  
AHC74994 *Geobacillus* sp. coli  
AFZ41119 *Geiobacterium* sp. DAU5  
AAAZ2235 *Geobacillus stearothermophilus*  
ABX83871 *Geobacillus thermodinitrificans*  
AFC78383 *Geobacillus thermoleovorans*  
ACL70573 *Halothermothrix orenii*  
ACQ30277 *Nostoc* sp. FCC\_T119  
AAB77110 *Nostoc* sp. cyprumium  
BAZ24178 *Streptococcus equinus*  
AAAP97431 *Streptococcus mutans*  
AEN59233 *Streptococcus mutans*  
OCD30600 *uncultured bacterium*  
ALP73597 *Varicoides alginolyticus*  
AEN52054 *Phaenocarpa apiculatus*  
ABAI1196 *Parabacillaria brasiliensis*  
BAW15172 *Pholiota microspora*  
AAAB60933 *Aedes aegypti*  
AAAB60934 *Aedes aegypti*  
AAAO3322 *Aedes atropalpus*  
AAAO3323 *Anopheles merus*  
AAW77198 *Anopheles merus*  
AAAN73139 *Anthonomus grandis*  
AAO13755 *Asterias rubens*  
AAAY23288 *Blattella germanica*  
BAB72259 *Callosobruchus chinensis*  
AAAO3350 *Culex tarsalis*  
AAAP2020 *Drosophila virgifera*  
ACB35243 *Drosophila ananassae*  
BAB91544 *Drosophila bocki*  
BAOA4582 *Drosophila erecta*  
BAB91509 *Drosophila kikkawai*  
BA9A5437 *Drosophila leontia*  
BA9A5441 *Drosophila lini*  
BAOA4583 *Drosophila obscuritarsis*  
AAK93479 *Drosophila melanogaster Amyrel*  
CAK28238 *Drosophila melanogaster*  
AAC46839 *Drosophila pseudoobscura*  
BAOA4585 *Drosophila sechellia*  
AAC46463 *Drosophila virilis*  
AAAG60011 *Drosophila yakuba*  
CAK76926 *Phaenocarpa caroliniae*  
PS56634 *Tenebrio molitor*  
AAAO33708 *Tribolium castaneum*  
AAFY3435 *Zabrotes subfasciatus*  
ABLO9312 *Acarus siro*  
BAB86535 *Anguilla japonica*  
BAI37207 *Ceras*  
AAJ37183 *Crasostrea gigas*  
AAAB38942 *Dermatophagoides pteronyssinus*  
AAAB38943 *Eurylyphus maynei*  
AAC06204 *Gallus gallus*  
ABQ26610 *Haletios tiscus discus*  
BAAB7656 *Haletios tiscus hancrati*  
AAH51724 *Homo sapiens*  
AAH63129 *Homo sapiens salivary*  
AAK37221 *Mus musculus*  
AAK37230 *Mus musculus*  
H2N004 *Oryzias latipes*  
CAK68065 *Pecten maximus*  
CAK54524 *Penaeus*  
CAB65552 *Penaeus vannamei*  
AAAF65827 *Pseudopleuronectes americanus*  
AAAA0725 *Rattus norvegicus*  
AAAB88228 *Rattus norvegicus*  
P38053 *Struthio camelus*  
AAQ02828 *Sus scrofa*  
CAK97125 *Tetranychus nigroviridis*  
AAZ21016 *Aeromonas hydrophila*  
BAI22082 *Bacillus* sp. 195  
ABY989038 *Bifidobacterium breve*  
CAB92962 *Halomonas meridiana*  
BAI52728 *Kocuria varians*  
CAK54202 *Micrococcus aurum*  
CAAI4991 *Pseudotaleromonas haloplanktis*  
BAAG6835 *Pseudomonas* sp. KFCC10818  
AAAG6317 *Streptomyces albus*

CSR-VII

[illegible][illegible]

-----





1 AAB5446 Paenibacillus polymyxa ---QN---GSGREKVVDDSFYSPQRSK---NGD---EAVFVINSNSQRT-RTI-GN-----  
1 CAA4945 Thermoactinomyces vulgaris ---RK---GTQAEKVVDDTFYAFQRSY---NGD---EVMVINSNSQRT-RTV-PN-----  
1 BAD0603 Aspergillus awamori ---DS---DYITKNDPIYDTSNTIAMRKGT---SGS---QVITVLSNKGSGS-SYT-LTL-----  
1 BAD0602 Aspergillus awamori ---DT---GFVTKNDPIYKDDTTIAMRKGT---DGS---QVITVLSNKGSGS-SYT-LSL-----  
1 AAF1424 Aspergillus flavus ---DT---GFVTKNDPIYKDDTTIAMRKGT---DGS---QVITVLSNKGSGS-SYT-LSL-----  
1 BAD0105 Aspergillus kawachii ---DT---GFVTKNDPIYKDDTTIAMRKGT---DGS---QVITVLSNKGSGS-SYT-LSL-----  
1 BAA2293 Aspergillus kawachii ---DS---DYITKNDPIYDTSNTIAMRKGT---SGS---QITVLSNKGSGS-SYT-LTL-----  
1 EAA6485 Aspergillus nidulans ---NE---TYLSKNDPIYNNNNVLMARKGF---DGS---QITVLSNKGSGS-SYT-LTL-----  
1 AAF17100 Aspergillus nidulans ---DS---SYLSRNTFPYDSNNTIAMRKGS---GGS---QVITLNNIGTIG-SYT-FDL-----  
1 P56271 Aspergillus niger ---DS---AYITKNDPIYDTSNTIAMRKGT---SGS---QVITVLSNKGSGS-SYT-LTL-----  
1 CAA44871 Aspergillus niger ---DT---GFVTKNDPIYKDDTTIAMRKGT---DGS---QVITVLSNKGSGS-SYT-LSL-----  
1 CAA40249 Aspergillus niger ---DN---HYPOVEDPIPEGGSELGFRKGI---EGR---QVVMLSTQGTNSS-AYN-LSM-----  
1 CAA41088 Aspergillus niger ---DS---SYISKNDPIYQGGSELAFWKGN---NGR---QVIMVLSNKGSGS-SYT-LTL-----  
1 CAA31218 Aspergillus oryzae ---DT---GFVTKNDPIYKDDTTIAMRKGT---DGS---QVITVLSNKGSGS-SYT-LSL-----  
1 BAA01255 Aspergillus shirousami ---DT---GFVTKNDPIYKDDTTIAMRKGT---DGS---QVITVLSNKGSGS-SYT-LSL-----  
1 ABB80431 Aspergillus tubingensis ---DS---DYITKNDPIYDTSNTIAMRKGT---SGS---QITVLSNKGSGS-SYT-LTL-----  
1 BAA12010 Cryptococcus sp. S.2 ---NG---GFVTKNDPIYDTSNTIAMRKGT---SGV---QVITVLSNKGSGS-SYT-LSL-----  
1 ABB48762 Fusicoccum sp. BCC4124 ---DA---TYLTKNDPIYKDDTTIAMRKGT---DGS---QVITVLSNKGSGS-SYT-LSL-----  
1 AAO12212 Lipomyces kononenkoae ---TG---QVTFYSDTIVLFGSGVSHMQRGP---G---LVIVLNNVQHII-DNT--GY-----  
1 AAC4622 Lipomyces spenceri ---DD---TYLTKNDPIYDTSNTIAMRKGT---TGN---QITVLSNKGSGS-SYT-LTL-----  
1 AAN75021 Lipomyces starkeyi ---DD---TYLTKNDPIYDTSNTIAMRKGT---TGN---QITVLSNKGSGS-SYT-LTL-----  
1 AAF54462 Malbranchea cinnamomea ---DD---AYITPTDIKYSDDHTLALVKGA---D---VTTLNAGANAG-ETT-VTV-----  
1 ABB72529 Ophiostoma floccosum ---DS---SWATSANSPFYQDSNTIAMKGS---SGS---XVITVLSNKGSGS-SYT-LSL-----  
1 EBB26265 Phaeoacremonium aleuticum ---DA---NYTSNNRNTPIYDTSNTIAMRKGS---SGS---QVITVLSNKGSGS-SYT-LSL-----  
1 ABO42285 Phanerochaete chrysosporium ---TD---NMLNSTEVLITTDYGLAIMKGP---G---VISIMTNGSPV-APE-PVL-----  
1 BAW15173 Pholiota microspora ---TD---DWHVKEAQLITTSFYGMKIMKGP---G---VISIVTNGSPV-NGT-HIA-----  
1 BAF98616 Pichia burtonii ---DN---SYPTSVSIIYSDHTIATKKAN---A---LVIAFTVNGASAS-P-S-VTL-----  
1 AGJ52081 Rhizomucor pusillus ---K---TVMDIYVGDNAYAFKRGD---A---LVVL---NNYSGST-N-Q-VSF-----  
1 ADL28123 Rhizopus oryzae ---S---TVMGIAQTDNVYVFRGGG---S---LVVV---NNYQGGST-N-T-ITV-----  
1 ABB02422 Saccharomyces fibuliger ---DS---SYATSGLVSVFSDNRYIATRKGS---G---VSVFNNLNGSGS-S-D-VTI-----  
1 ABB76467 Saitozyma flava ---NG---GFVTKNDPIYDTSNTIAMRKGT---SGV---QVITVLSNKGSGS-SYT-LSL-----  
1 CAB11471 Schizosaccharomyces pombe ---EDGEIYRSITRAIMIGDHWVMYKGP---G---VITFYNIGAVDK-EYL-IRM-----  
1 CAB40006 Schizosaccharomyces pombe ---DP---DMVTSTYQISAEVDHYVGGKND---D---VLVMFNNMGVYTN-L--TI-----  
1 CAA34162 Schwanniomyces occidentalis ---DS---AYSTKSSVSSSDHYIATRKGS---DAN---QLISFNNLNGSGS-Q-D-ITV-----  
1 CAA31912 Schwanniomyces occidentalis ---DS---KYTTKSSDVLVYASGHVIALQKGA---DQ---RIVSVFNNLNGSGS-Q-T-VTF-----  
1 ACN82436 Sclerotinia sclerotiorum ---DP---TYLTKNDPIYVSDGTTIAMRKGT---TGR---QITVLSNKGSGS-SYT-LTL-----  
1 CAA03110 Thermomyces lanuginosus ---NP---EFTSNTVIVQDSTIAIMKGS---G---VTTLNAGANAG-ETT-VTV-----  
1 BAG9580 Trichoderma viride ---AD---NDHKLHYEFTAYAWSRAG---G---KLVAFTVNSGGSS-A-Q-FCF-----  
1 CAJ21046 Valsaria rubricosa ---AG---NDHVLHYTTDNAYAWSRAS---G---KLIVVTSNKGSDS-S-T-ICF-----  
5 AWX62636 Alicyclobacillus sp. 18711 ---QH---DYLQNG---DVIGWTRGEG---SAHAG---SGLATVMSDG-PGGS-----  
5 AAQ01675 Alkalimonas amylolytica ---QH---EYSGNTE---AVAYVREGL---SNVPG---TGLVLMISGR-MGSS---Q-QS-----  
5 CAL14744 Anoxybacillus flavithermus ---QH---DYDASA---DIIGWTRGEG---AEKAN---SGLAALITDG-PGGS-----  
5 AEW07376 Bacillus acidicola ---QH---DYLDHS---DIIGWTRGEG---TEKPG---SGLAALITDG-PGGS-----  
5 AAA22191 Bacillus amyloliquefaciens ---QH---DYLDHS---DIIGWTRGEG---SSAKP---SGLAALITDG-PGGS-----  
5 ABB26223 Bacillus cereus ---QH---DYFDHP---DVIGWTRGEG---SVHAN---SGLATISDG-PGCT-----  
5 CAD26699 Bacillus halmapalus ---QH---DYFDHP---DIIGWTRGEG---TTHPN---SGLATISDG-PGGE-----  
5 AAA22226 Bacillus licheniformis ---QH---DYFDHP---DVIGWTRGEG---SSVAN---SGLAALITDG-PGGA-----  
5 AEM05860 Bacillus licheniformis ---QH---DYFDHP---DVIGWTRGEG---SSVAN---SGLAALITDG-PGCT-----  
5 AAK00598 Bacillus megaterium ---QH---DYFDHP---DVIGWTRGEG---SVHAN---SGLATISDG-PGGA-----  
5 AKN35141 Bacillus paralicheniformis ---QH---DYFDHP---DVIGWTRGEG---SSVAN---SGLAALITDG-PGCT-----  
5 AAN68734 Bacillus sp. ---QH---DYFDHP---DVIGWTRGEG---SSHPN---SGLATISDG-PGGM-----  
5 AAA22231 Bacillus sp. 707 ---QN---DYLDHS---DIIGWTRGEG---TTHPN---SGLATISDG-PGGS-----  
5 BAF03567 Bacillus sp. JAMB 204 ---QH---DYIDNQ---DVIGWTRGEG---TSKAK---SGLAALITDG-PGGA-----  
5 CAC39917 Bacillus sp. KSM K38 ---QH---DYFDHP---DVIGWTRGEG---SSHPN---SGLATISDG-PGGS-----  
5 AAB18785 Bacillus sp. MK 716 ---QH---DYLDHS---DIIGWTRGEG---TEKPG---SGLAALITDG-PGGS-----  
5 AAA63900 Bacillus sp. TS 23 ---QH---DYIDHQ---DIIGWTRGEG---DTKPN---SGLAALITDG-PGGS-----  
5 ABB97262 Bacillus sp. YK\_YK1 ---QH---DYIDHQ---DIIGWTRGEG---SSAKP---SGLAALITDG-PGGS-----  
5 AAF00567 Cytophaga sp. ---QH---DYIDNP---DVIGWTRGEG---STKAK---SGLATVITDG-PGGS-----  
5 AAC74994 Escherichia coli ---QT---LFFDHP---NCIAFSRGT---DEFFG---CVVMSNG-DGGE-----  
5 AFZ41193 Exiguobacterium sp. DAU5 ---QH---DYIDHQ---DVIGWTRGEG---TDRAK---SGLATISDG-PGGS-----  
5 AAA22235 Geobacillus stearothermophilus ---QH---DYLDHS---DIIGWTRGEG---TEKPG---SGLAALITDG-PGGS-----  
5 ABB383871 Geobacillus thermodenitrificans ---QH---DYLDHS---DIIGWTRGEG---TEKPG---SGLAALITDG-PGGS-----  
5 ABB383871 Geobacillus thermoleovorans ---QH---DYLDHS---DIIGWTRGEG---TEKPG---SGLAALITDG-PGGS-----  
5 ACL70573 Halothermothrix orenii ---CY---DYIDNDQA---DIYSVRSCT---PDVAG---DGLVMSIDG-TSGM---V-AG-----  
5 CAQ30277 Nostoc sp. POC\_7119 ---QY---NYLDHW---NTIGWTRGEG---ADHPG---GMVIMSIDG-SBGI-----  
5 AAA27110 Salmonella typhimurium ---QT---LFFDHP---NCIAFSRGT---EENPG---CVVMSNG-DGGE-----  
5 BAA24178 Streptococcus equinus ---EM---NYFDPN---NCIGWSYLG---KEHPT---SLAVLINA-HSTA-----  
5 AAA97431 Streptococcus equinus ---EM---DYFDQA---NCIGWTCG---DEHPT---ALAGLINS-KATS-----  
5 AAN59233 Streptococcus mutans ---QH---DYFDQA---NCIGWTCG---DEHPT---GMVIMSIDG-EANC-----  
5 CCB30600 unclassified bacterium ---QH---DYFDHP---DVIGWTRGEG---SEVFG---DGLVMSIDG-EBGI---I-IS-----  
5 ALP73597 Vibrio alginolyticus ---QH---SYLDHW---DVIGWTRGEG---AKHPG---S-MVIMSIDG-PGGS-----  
5 ABB62854 Histoplasma capsulatum ---QR---DYFDKR---HCIGVFRGD---SGHPD---GLACVLSNG-PAAAT-----  
5 ABS11196 Paracoccidioides brasiliensis ---QR---DYFNKR---NCIGVFRGD---SAHPH---GLACVLSNG-PADK-----  
5 BAW15172 Pholiota microspora ---TE---DYFAHP---NCIGVFRGD---ATHGT---CAVLSNKG-EGDSTYL-HE-----  
15 AAB60935 Aedes aegypti ---SLDHQIA-T-QNTAFPCRG---KGF-IVFNNS--B-N-TIT-QQY-----  
15 AAB60934 Aedes aegypti ---GLND WSDG-NQOIAFGRGD---KGF-IVFNNS--G-Y-DNN-ENL-----  
15 AAO03322 Aedes atropalpus ---MLN WSDG-NQOIAFGRGD---KGF-IVFNNS--G-Y-DNN-ENL-----  
15 AAO03323 Anopheles merus ---PLQH WSDG-NQOIAFGRGD---KGF-IVFNNS--P-F-DNN-VLL-----  
15 AAN77138 Anthonomus grandis ---ELTN WSDG-DNQIAFSGR---KGF-IVFNNS--G-Y-DNN-SNI-----  
15 AAN77139 Anthonomus grandis ---DMQO WSDG-N-QIAFSGR---KGF-IVFNNS--G-Y-DNN-SNI-----  
15 AAO13755 Asterias rubens ---PLTN WSDG-NHMAFGRGD---KGF-IVFNNS--G-Y-DNN-SNI-----  
15 AAY23288 Blattella germanica ---AVIN WSDG-DQOIAFSGR---KGF-IVFNNS--YNT-HIM-HTL-----  
15 BAB72257 Callosobruchus chinensis ---ELTN WSDG-NQOIAFGRGD---KGF-IVFNNS--G-Y-DNN-SNI-----  
15 AAO03350 Culex tarsalis ---GVND WSDG-AKWMAFGRGD---KGF-IVFNNS--G-Y-DNN-SNI-----  
15 AAF20998 Diabrotica virgifera virgifera ---GINN WSDG-HQOIAFGRGD---KGF-IVFNNS--G-Y-DNN-SNI-----  
15 AAG35243 Drosophila ananassae ---PVQN WSDG-NQOIAFSGR---KGF-IVFNNS--N-S-DLN-QSL-----  
15 BAB91544 Drosophila bocki ---AIQN WSDG-SNQIAFSGR---KGF-IVFNNS--N-Y-DLN-SSL-----  
15 BAA04582 Drosophila erecta ---AIQN WSDG-SNQIAFSGR---KGF-IVFNNS--N-Y-DLN-SSL-----  
15 BAB91509 Drosophila kikkawai ---AIQN WSDG-SNQIAFSGR---KGF-IVFNNS--N-Y-DLN-SSL-----  
15 BAB95437 Drosophila leontis ---AIQN WSDG-SNQIAFSGR---KGF-IVFNNS--N-Y-DLN-SSL-----  
15 BAA95441 Drosophila lini ---AIQN WSDG-SNQIAFSGR---KGF-IVFNNS--N-Y-DLN-SSL-----  
15 BAA04583 Drosophila mauritiana ---AIQN WSDG-SNQIAFSGR---KGF-IVFNNS--N-Y-DLN-SSL-----  
15 AAK93479 Drosophila melanogaster Amyrel ---EITG WSDG-DNQISFCRGN---KGF-IVFNNS--L-Y-DLS-QDL-----  
15 CAA28238 Drosophila melanogaster ---EIQN WSDG-SNQISFCRGN---KGF-IVFNNS--N-Y-DLN-SSL-----  
15 AAG48839 Drosophila pseudoobscura ---DLQN WSDG-SNQIAFSGR---RAF-IVFNNS--N-Y-DLN-SSL-----  
15 BAA04585 Drosophila sechellia ---AIQN WSDG-SNQIAFSGR---KGF-IVFNNS--N-Y-DLN-SSL-----  
15 AAG46463 Drosophila virilis ---QLQN WSDG-SNQIAFSGR---QGF-IVFNNS--N-Y-DLN-SSL-----  
15 AAG60011 Drosophila yakuba ---AIQN WSDG-SNQIAFSGR---KGF-IVFNNS--N-Y-DLN-SSL-----  
15 CAA76926 Phaedon cochleariae ---SISN WSDG-NQOIAFGRGD---KGF-IVFNNS--G-Y-DLN-QNL-----  
15 P56634 Tenebrio molitor ---QVEN WSDG-DNQIAFSGR---KGF-IVFNNS--G-Y-DLN-QNL-----  
15 AAO03708 Tribolium castaneum ---GIEN WSDG-NQOIAFGRGD---KGF-IVFNNS--G-Y-DLN-QHF-----  
15 AAF73435 Zabrotes subfasciatus ---DMTN WSDG-YQOIAFGRGD---KGF-IVFNNS--G-Y-DLN-QHF-----  
24 ABB09312 Acares siro ---AVSH WSDG-DQOIAFGRGD---KGF-IVFNNS--G-Y-DLN-QHF-----  
24 BAB85635 Anguilla japonica ---PISH WSDG-SNQVAFGRGD---KGF-IVFNNS--DR-HLD-MTL-----  
24 AAL37207 Crassostrea gigas ---TMIN WSDG-DYIAFSGR---KGF-IVFNNS--TS-DIN-VNL-----  
24 AAL37183 Crassostrea gigas ---TLTN WSDG-DYIAFSGR---KGF-IVFNNS--TS-DIN-VNL-----  
24 AAD38942 Dermatophagoidea pteronyssinus ---PVHN WSDG-DYQIAFSGR---KGF-IVFNNS--Q-NLQ-QKL-----  
24 AAD38943 Euroglyphus maynei ---PVHN WSDG-DYQIAFSGR---KGF-IVFNNS--Q-NLQ-QKL-----  
24 AAO60246 Gallus gallus ---HAF-IAINLQGRK-NLR-QRL-----  
24 ABO26610 Haliotis discus discus ---KAF-IAFNLE-GY-DLS-KSL-----  
24 BMM74656 Haliotis discus hannai ---GLSN WSDG-DYQIAFSGR---KAL-IAFNLE-GY-DLS-KSL-----  
24 AAS1724 Homo sapiens pancreatic ---P-YN YDNG-SNQVAFGRGD---KGF-IVFNNS--DW-SFS-LTL-----  
24 AAB63129 Homo sapiens salivary ---P-YN YDNG-SNQVAFGRGD---KGF-IVFNNS--DW-TFS-LTL-----  
24 AAB37221 Mus musculus ---P-AN WSDG-SNQVAFGRGD---KGF-IVFNNS--DW-ALS-ETL-----  
24 AAB37230 Mus musculus ---P-AN WSDG-SNQVAFGRGD---KGF-IVFNNS--DW-ALS-ATL-----  
24 B2B004 Oryzias latipes ---PHSN WSDG-SNQVAFGRGD---KGF-IVFNNS--DW-ALS-ATL-----  
24 CAA68065 Pecten maximus ---MLQH WSDG-NQOIAFGRGD---KGF-IVFNNS--NR-NLD-QTL-----  
24 CAA54524 Penaeus vannamei ---DMND WSDG-SNQIAFGRGD---KGF-IVFNNS--GW-DLK-ETL-----  
24 CAB65552 Penaeus vannamei ---DMND WSDG-SNQIAFGRGD---KGF-IVFNNS--GW-DLK-ETL-----  
24 AAF65827 Pseudopleuronectes americanus ---PHSN WSDG-SNQVAFGRGD---KGF-IVFNNS--DW-DLD-ETL-----  
24 AAB40725 Rattus norvegicus ---P-AN WSDG-SNQVAFGRGD---KGF-IVFNNS--DW-ALS-STL-----  
24 AAB88228 Rattus norvegicus ---P-AN WSDG-SNQVAFGRGD---KGF-IVFNNS--DW-DLS-TTL-----  
24 B93053 Streptococcus caninus ---P-AN WSDG-SNQVAFGRGD---KGF-IVFNNS--DW-DLS-STL-----  
24 AAF02828 Sus scrofa ---P-AN WSDG-SNQVAFGRGD---KGF-IVFNNS--DW-DLS-STL-----  
24 CAC87125 Tetraodon nigroviridis ---PHSN WSDG-SNQVAFGRGD---KGF-IVFNNS--DW-DLD-VTL-----  
32 AAB21016 Aeromonas hydrophila ---PVSN WSDG-NQOIAFSGR---RAS-SPSTTRA-----  
32 BAA22082 Bacillus sp. 195 ---AVNN WSDG-SSAIAFGRGD---KGF-IVFNNS--ALT-RTF-----  
32 AAY89038 Bifidobacterium breve ---DVTN WSDG-TNVLGFRGD---VGY-LAINNSAD--DSK-QTF-----  
32 CAB92963 Bifidobacterium meridianus ---EITL WSDG-HNIAFSGR---KGF-IVFNNS--ALT-HTF-----  
32 BAJ52728 Clostridium varians ---PVTD WSDG-EQSLAFGRGD---KGF-IVFNNS--GLD-ASW-----  
32 AAG25402 Microbacterium aurum ---DVNN WSDG-SADGSAIGFRGD---KGF-IVFNNS--SVQ-REF-----  
32 CAA41481 Pseudoalteromonas haloplanktis ---AVTN WSDG-NQOIAFGRGD---SGH-MAINKESS--TLT-ATV-----  
32 AAB6835 Pseudomonas sp. KFC10818 ---RVTN WSDG-YNQVAFGRGD---LGF-VINRDDN--K-GIN-QGF-----  
32 AAB6317 Streptomyces albus ---PVTD WSDG-ADAIAFGRGD---KGF-IVFNNS--TVQ-RTY-----

32 BAC73693 Streptomyces avermitilis -----SVTN MDNG-GDAIAPGRGA-----KGY-VAINHESG-----SLT-RTY-----QT  
32 CAA40798 Streptomyces griseus -----PVTN MDNG-GDQIAPGRGD-----KAY-VAINHESG-----ALN-RTF-----QS  
32 AAA26698 Streptomyces hygroscopicus -----ELTN MDNG-GRPIAFARSD-----KGF-VALNNGDA-----ALT-QTF-----AT  
32 AAA88554 Streptomyces linosus -----VTDN MDNG-GRPIAFARSD-----KGY-VAINHESG-----ALN-RTF-----QS  
32 CAB06622 Streptomyces lividans -----GVTD MDNG-GDQIAPGRGS-----KAY-VAINHESG-----SLT-RTF-----QT  
32 CAA73775 Streptomyces sp\_T01 -----AVTD MDNG-GDAIAPGRGS-----KGF-VAINHESA-----TIS-RTY-----QT  
32 AAA82875 Streptomyces sp\_WL6 -----ELTD MDNG-GSALAPGRGD-----KGF-VALNADD-----ALT-ETF-----TT  
32 AAA26697 Streptomyces thermoviolaceus -----PVTD MDNG-ADAIAPGRGS-----KGF-VAINHESA-----TVQ-RTY-----QT  
32 AAB36561 Streptomyces venezuelae -----AVTN MDNG-NNAIAPGRGS-----KAY-VAINHETS-----ALT-RTF-----QT  
32 ABP13450 Thermobifida fusca -----GIGSAVTGD-NRIAPARSG-----AGY-AAFNATNT-----AWT-RTF-----TT  
32 CAA41881 Thermomicrospora curvata -----VTDN MDNG-GRPIAFARSD-----KGY-AAFNATNT-----AWT-RTF-----TT  
32 BAV60949 Pholiota microspora -----SAAITD VSPQ-AQIAPGRGA-----LGF-VAINNADS-----SWT-SAF-----TT  
32 KJA26527 Hypholoma sublateritium -----SSALTN VSPQ-SQIAPGRGA-----LGF-VAINNVD-----TWT-ATF-----TT  
32 KDR78015 Galerina marginata -----TSALTN VSPQ-SQIAPGRGA-----LGF-VAINNADF-----AWS-TSF-----TT  
32 PPQ83160 Psilocybe cyanescens -----TSALTN VSPQ-SQIAPGRGA-----LGF-VAINNADS-----AWS-TTF-----TT  
32 KTB32361 Moniliophthora roreri -----SALTN VSPQ-SQIAPGRGS-----AGF-VAINNADS-----TWS-ASF-----ST  
32 KDQ30003 Pleurotus ostreatus -----SAGITN VSPQ-SQIAPGRGS-----AGF-VAINNADS-----SWT-ATF-----AT  
32 RDX41646 Polyporus brumalis -----SALTN VSPQ-SQIAPGRGA-----LGF-VAINNADS-----AWS-ATF-----ST  
32 OJT13448 Trametes pubescens -----SALTN VAPQ-SQIAPGRGS-----LGF-VAINNADS-----AWT-STF-----TT  
32 PFH45132 Amanita thiersii -----TASMTN VSPQ-SQIAPGRGS-----AGF-IVINNAGS-----SWT-STF-----TT  
32 KIM37787 Hebeloma cylindrosporum -----SALTN VSPQ-SQIAPGRGS-----LGF-VAINNADY-----AWS-ATF-----AT  
32 PBK61492 Armillaria solidipes -----SAAITD VSPQ-SSQIAPGRGS-----AGF-VAINNAS-----DWS-SSF-----TT  
32 ETW76368 Heterobasidium irregulare -----SALTN VAPS-SQIAPGRGS-----LGF-VAINNVD-----SWT-ATF-----TS  
32 RDB27268 Heterobasidium macrosporus -----SALTN VAPS-SQIAPGRGA-----AGY-VAINNVD-----AWT-TTF-----TT  
32 PPQ71147 Gymnopilus dilepis -----SAPMTN VSPQ-SQIAPGRGS-----LGF-VAINNADT-----ANN-AVF-----TT  
32 OSD07916 Trametes coccinea -----SAPMTN VAPQ-SQIAPGRGS-----LGF-VAINNADA-----DWS-TTF-----ET  
32 KZW01389 Exidia glandulosa -----SALTN RSDS-SQIAPGRGA-----LGF-VAINNQDD-----AWS-ATF-----ST  
32 EIW55835 Trametes versicolor -----SALTN VAPQ-SQIAPGRGS-----LGF-VAINNADS-----AWT-STF-----TT  
32 SJU11930 Armillaria oostoyae -----STALTD VSPQ-SSQIAPGRGS-----AGF-VAINNAS-----DWS-SSF-----TT  
32 PAV18085 Pyrrhoderma noxium -----SSALTN VSPS-SQIAPGRGS-----VAF-VAINNESD-----SWT-AEF-----NT  
32 RPO65356 Lentinus tigrinus -----SALTN VSPQ-SQIAPGRGA-----LGF-VAINNADS-----DWS-ATF-----ST  
32 PBK84861 Armillaria gallica -----SAAITD VSPQ-SQIAPGRGS-----AGF-VAINNAS-----DWS-SSF-----KT  
32 KLO18298 Schizopora paradoxa -----AASMTN VSAS-SQIAPGRGS-----AGF-VAINNADS-----TWT-TTF-----ET  
32 PPR08271 Panaeolus cyanescens -----ISEITN VSPQ-SQIAPGRGS-----LGF-VAINNADS-----DWT-ATF-----IT  
32 KIK53845 Gymnopus luxurians -----SALTN VSPQ-SQIAPGRGS-----LGF-VAINNADS-----AWS-ATF-----TT  
32 KIJ56451 Sphaerobolus stellatus -----GNVTN VSPG-SQIAPGRGS-----TGF-VAINNQDS-----TWT-STF-----QT  
32 EJD07843 Botrytis mediterranea -----SPHALN VSPS-SQIAPGRGA-----AGF-VAINNESD-----SWT-ATF-----NT  
32 EPQ53992 Gloeophyllum trabeum -----SALTN VSPG-SQIAPGRGS-----LGF-VAINNQAS-----SWT-GTF-----AT  
32 KIP11288 Phlebiopsis gigantea -----TAAITN QSPQ-ASQIAPGRGA-----LGF-VAINNADT-----AWS-ATF-----TT  
32 KIY62009 Cylindrobasidium torrendii -----STAVTN QSPQ-GNRIAPERAG-----TGF-VAINNDSG-----AWT-GTF-----TT  
32 KIJ69360 Hydnum erulius pinastri -----SAALEN VSPA-ADQIAPGRGS-----LGF-VAINNDDY-----PWT-ATF-----TT  
32 KZT20455 Neolentinus lepideus -----SAAITD VAPS-SQIAPGRGS-----AGF-VAINNEDT-----SWT-TTF-----ST  
32 KGM97351 Serpula lacrymans var lacrymans -----TAAIGD VSPS-SQIAPGRGA-----LGF-VAINNESD-----TWA-TTF-----TT  
32 KDQ06010 Botrybasidium botryosum -----STALTN VSPQ-SQIAPGRGD-----LGF-VAINNADA-----DWS-RTF-----TT  
32 PPR00074 Panaeolus cyanescens -----SGSLVN VSPA-AMRIAPGRGS-----AGY-VAINNADS-----AWS-ATF-----RT  
32 EKM53319 Phanerochaete carnea -----TAMMTN VSPQ-SQIAPGRGS-----LGF-VAINNADA-----VWT-TTF-----AT  
32 TBU45601 Dichomitus squalens -----DAEVTN VSPQ-SQIAPGRGA-----LGF-VAINNADS-----DWS-ATF-----ST  
32 PSR82077 Phlebia centrifuga -----SAALVN VSPQ-SQIAPGRGA-----LGF-VAINNADS-----DWT-ATF-----TT  
32 KIM89391 Piloderma croceum -----EAPITN VSPQ-SQIAPGRGS-----AGF-VAINNDDF-----AWS-TTF-----TT  
32 PIL31175 Galerina marginata -----RGTN VSPQ-SQIAPGRGD-----LGF-VAINNADS-----AWS-TTF-----TT  
32 KIY70325 Cylindrobasidium torrendii -----STALTN QSPQ-GRIAPERGD-----TGF-VAINNADA-----AWT-GTF-----TT  
32 KDQ58060 Jaapia argillacea -----DASLTD VAPT-SQIAPGRGS-----LGF-VAINNADS-----AWT-ATF-----ST  
32 CEL62905 Rhizoctonia solani -----GSVNTN VSGT-NQIAPGRGS-----SGF-VVINNADS-----AWT-RTF-----TT  
32 GAT57350 Mycena chlorophos -----TAALVN ASPQ-ASQIAPGRGA-----LGF-IAINNADA-----AWT-GTF-----TT  
32 KIM25608 Serendipita vermifera -----SALTN VSGT-SQIAPGRGS-----AGF-VVINNADS-----SWS-ATF-----TT  
32 GAW02849 Lentinula edodes -----SAAITD VSPQ-SQIAPGRGA-----LGF-VAINNADT-----VWS-ATF-----ST  
32 TCD63303 Steccherinum ochraceum -----SALTN VSPQ-SQIAPGRGS-----LGF-VAINNADS-----DWS-ATF-----ST  
32 KZP22139 Fibularhizoctonia sp\_CBS\_109695 -----SSALTN VSPQ-ADRIAPERQA-----LGF-IAINNADA-----AWT-GTF-----TT  
32 KII90441 Plicaturopsis crispa -----SEDLTD VSPS-SQIAPGRGS-----TGF-VAINNESD-----DWS-NTF-----ST  
32 KDQ58058 Jaapia argillacea -----SAPLTV VAVG-AQIAPGRGS-----AGF-VAINNADT-----PWS-FQF-----QT  
32 OCH93218 Obba rivulosa -----DADMEG VAEQ-TNQIAPGRGS-----LGF-VAINNADT-----VWS-TTF-----ST  
32 EMD36390 Gelatoporia subvermispora -----DADMEG IAEQ-SQIAPGRGS-----LGF-AAINNADT-----IWS-TTF-----ST  
32 EIM78746 Cortophora puteana -----SALNLD SPSG-SSQIAPGRS-----NAF-VAINNESD-----DWS-TTF-----QT  
32 KII86244 Plicaturopsis crispa -----SALTN VSPQ-SQIAPGRGT-----LGF-VAINNDSG-----AWT-ATF-----TT  
32 EKM75205 Agaricus bisporus -----SATLNV VSPQ-SQIAPGRGS-----LGF-VAINNANS-----QWS-STF-----TT  
32 KZT36083 Sistotremastrum suecicum -----SSAVTN VAPS-SQVAPGRGA-----LGF-VAINNQDS-----TWT-SSF-----TT  
32 KZS90559 Sistotremastrum niveocreum -----SSAVTN VAPS-SQVAPGRGA-----LGF-VAINNQDS-----TWT-SSF-----TT  
32 EFI98134 Schizophyllum commune -----DAELTD VSPQ-GSQIAPGRGS-----AGY-VAINNADS-----EWS-TTF-----ST  
32 BHC62173 Tricholoma matsutake -----SAGITN MSGG-PQIAPGRGS-----AGF-MAMNMSD-----SWT-ATF-----VT  
32 CCA69081 Serendipita indica -----STALTN VSPA-SQIAPGRGA-----SGF-VVINNADS-----SWT-STF-----TT  
32 EFI98135 Schizophyllum commune -----DVMSD VSPS-SQIAPGRGA-----LGF-VAINNVDQ-----EWT-TTF-----AT  
32 KII85613 Plicaturopsis crispa -----AGSLNV VSGT-SSQIAPGRGS-----AGH-VAINNGVK-----DWS-VTL-----AT  
32 EIN11730 Punctularia strigosozonata -----DAAVTD VSPS-SQIAPGRGS-----SGF-VAINNESD-----AWS-TTF-----QT  
32 PIL33242 Ganoderma sinense -----NAAMTS TAPE-GQRIAPGRGA-----LGF-VAINNESD-----EWS-TTF-----AT  
32 KZT18190 Neolentinus lepideus -----KESTIN VAPT-EQIAPGRGS-----KGF-VAINNADT-----AWT-ANF-----TT  
32 KEV75308 Lentinophora sp\_CONT -----TAALEN VAPS-SQIAPGRGS-----VGF-VAINNDSG-----QWS-TSF-----KT  
32 KII86838 Plicaturopsis crispa -----SGALQV VSGT-SQIAPGRGS-----AGL-VAINNANS-----AWT-VTL-----AT  
32 KDQ08018 Botrybasidium botryosum -----GTPVANVTGS-SQIAPSRGA-----VAF-VAINNDCN-----PWS-KTF-----AT  
32 KIY73061 Cylindrobasidium torrendii -----DAELTN QSPQ-GSQIAPERGD-----AGF-VAINNDSG-----DWE-GTF-----TT  
32 KZW01365 Exidia glandulosa -----DVSNQKGT-AQIAPSRGT-----TGF-VAINNEDA-----TWT-GSF-----ST  
32 KDQ58178 Jaapia argillacea -----PVTN FASG-SQIAPGRGS-----VAF-IVINNADA-----HWS-GKF-----NT  
32 KEV75307 Peniophora sp\_CONT -----TAVLVN VAPS-SQIAPGRGT-----VGF-VAINNQDG-----SWS-TSF-----KT  
32 KIK51212 Gymnopus luxurians -----SALTN VSPQ-SQIAPGRGN-----LGF-IAINNDF-----EWS-TTF-----TT  
32 RDX41931 Polyporus brumalis -----TAPMTN VAPD-SQIAPGRGS-----LGF-VAINNESD-----AWT-ATF-----TT  
32 TBU29254 Dichomitus squalens -----NVDITN TAPA-AQRIAPGRGS-----LGF-VAINNESD-----EWW-MKF-----HT  
32 KIY45802 Fistulina hepatica -----AGVSN VSPQ-NRIAPGRGT-----LGF-VAINNDD-----DWT-DTF-----NT  
32 KIL59382 Amanita muscaria -----SSPVTN VSPQ-SQIAPGRGS-----LGF-VAINNADT-----PWT-SSF-----ST  
32 KIY53725 Fistulina hepatica -----AELTN VSPQ-YDRIAPGRGT-----LGF-VGINNDG-----SWS-GTF-----TT  
32 KIY47132 Pistulina hepatica -----ASLTN ASPS-PQIAPGRDR-----TGF-VAINNADT-----HWK-TQF-----NT  
32 RPO55342 Lentinus tigrinus -----TAMMTN VSPQ-SQIAPGRGS-----LGF-VAINNESD-----AWS-ATF-----ST  
32 TCD61445 Steccherinum ochraceum -----SALTN VSPS-SQIAPGRGN-----VGF-VIINNDA-----AWG-ATF-----TT  
32 KIM25602 Serendipita vermifera -----DAPLGN QTGT-HQIAPGRGS-----SGF-VAINNEG-----EWS-PTF-----ST  
32 EJD37603 Auricularia subglabra -----AVQNVKGT-AQVAFARGA-----TGF-VAINNEDA-----VWS-GAF-----ST  
32 KZT54766 Calocera cornea -----TPL-DNVVTGT-SQIAYGRGS-----TGF-IAINNGD-----QWS-TTF-----TT  
32 KIY46805 Fistulina hepatica -----APMTD VSPA-NRIAPGRGN-----PFG-VAINNDA-----AWG-ATF-----VT  
32 PPQ69654 Psilocybe cyanescens -----SSPLDHTVGT-SQIAYGRGS-----TGY-VAINNDD-----EWS-ATF-----ET  
32 KZQ93971 Calocera viscosa -----SAVNV AAGS-DQIAPGRGS-----VAF-VAINNVDQ-----PWS-QAF-----AT  
32 PVG03687 Serendipita vermifera -----VLQN QTGT-NQIAPSRGS-----SGF-VAINNGD-----DWS-KTF-----ST  
32 EIM87674 Stereum hirsutum -----AVG-QSSALTNQGT-NQIAPGRGS-----LGF-VAINNAS-----SWS-ATF-----TT  
32 CCA69087 Serendipita indica -----EITN QTGT-HQIAPGRGN-----LGF-VAINNESD-----QWS-AEF-----TT  
32 CEL62035 Rhizoctonia solani -----GLTN AGGS-NQIAPGRGD-----AGF-VAINNEDW-----AWT-STF-----QT  
32 EIM05398 Punctularia strigosozonata -----SALNV VQGS-TQIAPGRGS-----AGF-VAINNESG-----AWS-KTF-----TT  
32 EJU02896 Dacryopinax primigenitus -----ASL-DHVMGT-AQIAYGRGS-----TGF-VAINNDSG-----AWS-ATF-----ST  
32 KIO30302 Tulasnella calospora -----GTSINA VSDQ-ASQIAPGRGS-----SGF-VAINYSS-----IWT-KTF-----TT  
32 CEL62036 Rhizoctonia solani -----GLGN VQGS-NQIAPGRGS-----SGF-VAINNEG-----QWT-QTF-----QT  
32 KIO24533 Tulasnella calospora -----ALKN KQGD-SQIAPGRGS-----VGF-VIINNSN-----KWK-TTF-----TT  
32 EIM84100 Stereum hirsutum -----SLTN QTGS-NMQIAYERDA-----TGF-VIINNTG-----EWD-NTF-----TT  
32 KIM35973 Rhizoctonia solani -----RGNFHSNATPL-CSTVIVGRSNWQSGRGRCCTIF-1PSFRITK-----SWS-DH-----RC  
32 KIY48489 Fistulina hepatica -----SMVN TSAS-SQIAPGRGS-----VGF-VAINNAS-----EWS-TTF-----ST  
32 KIY48486 Fistulina hepatica -----SMVN QMGT-SQIAPGRGS-----TGF-VAINNAS-----DWS-STF-----ST  
32 KZP26813 Fibularhizoctonia sp\_CBS\_109695 -----KNVTD FSPN-SELIAFGRGS-----SGF-VAINNQT-----DWDASF-----ST  
32 KDQ32476 Pleurotus ostreatus -----APLENQSPR-DRIAPSRGK-----SGF-VAINNSD-----PWS-ATL-----NT  
32 EIM84087 Stereum hirsutum -----PLTN QSGS-PQIAYERAG-----KGF-VVINNSG-----DWS-NSW-----TC  
32 KDQ32475 Pleurotus ostreatus -----TKLEN QSPQ-GRIAPSRGN-----AGF-VAINNSD-----PWI-STL-----LT  
32 EAG88347 Stereum hirsutum -----VAVD MDNG-NQIAPGRGD-----LGF-VAINNDSG-----SLT-RTF-----QT  
32 ORY89754 Leucosporidium creatinivorum -----SAVNSLATS-TNBSAPGRGS-----IGH-VAINFESS-----SWD-ATL-----DT  
32 EW234052 Fusarium oxysporum -----GLTN MDNG-NNAIAPGRGS-----MGY-VAINHESG-----SVT-HTY-----QT  
32 OBT91518 Pseudogymnoascus verrucosus -----ALTN MDNG-NNAIAPGRGS-----KGY-VAINHESG-----SVT-QTF-----QT  
32 KEY73157 Stachybotrys chartarum -----AVTN MDNG-NQIAPGRGS-----RGF-IAINKESS-----SLT-RTF-----QT  
32 OBT62577 Pseudogymnoascus sp\_23342\_1\_I1 -----ALSN MDNG-NNAIAPGRGS-----KGY-VAINHESG-----SVT-QTY-----QT  
32 EKM97874 Phaeoacremonium minimum -----ELTD MDNG-NNAIAPGRGD-----KGY-VAINHESG-----SLT-RTY-----QT  
32 GAT55198 Mycena chlorophos -----QILNDV VSGT-SQIAPGRGS-----LGF-VAINNADT-----PWT-QTF-----TT  
32 OAG04271 Paraphaeosphaeria sporulosa -----GVTN MDNG-NQIAPGRGN-----QGF-VAINKESS-----VLT-QTL-----QT  
32 EGG02960 Melampsora larici populina -----PVNIIITSG-SNRTAYSRS-----KGF-IALNNEPE-----EWLPPG-----TV  
32 EGG02993 Melampsora larici populina -----PVNIIITSG-VNRTAYSRS-----RAF-VALNNEPE-----EWLQSG-----TQ  
32 OAV91411 Puccinia triticina -----PVNIIITSG-AHRIAPSRGS-----KVF-VAINNDS-----PWLRLDV-----LV  
32 EFP79978 Puccinia graminis -----PVNIIITSG-AHRIAPSRGS-----KVF-VAINNDS-----AWLRLDV-----VV  
32 GAT51088 Mycena chlorophos -----ASLSTSTSG-NQIAPGRGS-----LGF-VAINNDSG-----SWS-QTF-----ST  
32 KNE94052 Puccinia striformis -----PVQNIITSG-AHRIAPSRGS-----KVF-VAINNDS-----DWLEDV-----VV  
32 KN254553 Puccinia sorghi -----E-HRHF-----MIVGAVRGA-AASQ-----PVQNIITVS-RNGO-V-LSSIMEREKATEN  
42 AOF40721 Microbacterium aurum -----KQKQ-----STEGVSGNMAFKRRFT-----EGS-----VD-SFAVA-1SGG-A-----  
42 CAB06816 Streptomyces lividans -----QMKG-----STDGVTGDMAFKRRYT-----DGG-----TD-SFALT-VSGG-A-----  
42 AWA81565 Pecoramyces ruminatum -----KQKQ-----A-SVDGQMAFKRRYT-----DNN-----TD-SFACVS-ITGG-A-----





32 BAC73693 *Streptomyces avermitilis*  
32 CA40798 *Streptomyces griseus*  
32 AAA62698 *Streptomyces hygroscopicus*  
32 AAA88554 *Streptomyces limosus*  
32 CAB0622 *Streptomyces lividans*  
32 CA73715 *Streptomyces rochei*  
32 AAA82875 *Streptomyces\_sp\_ML6*  
32 AAA26697 *Streptomyces thermophilolacus*  
32 AAB36561 *Streptomyces venezuelae*  
32 ABF1340 *Thermobifida fusca*  
32 CA41881 *Thermomonospora curvata*  
32 AB09499 *Phlebia nigrispora*  
32 KJ2652 *Phlebia subteritum*  
32 KDR78015 *Phlebia marginata*  
32 PQ083160 *Psilocybe cyaneusens*  
32 KTB32361 *Moniliophthora roreri*  
32 KDX130003 *Pleurotus ostreatus*  
32 KDX41644 *Pleurotus brumalis*  
32 KJ73448 *Polyporus fructitrem*  
32 PF45132 *Amantia thiersii*  
32 KIM37787 *Hebeloma cylindrosporum*  
32 PKR61492 *Armillaria solidipes*  
32 ETW76368 *Heterobasidion irregulare*  
32 RDB27268 *Hypsizygomus marmorosus*  
32 PQ71147 *Gyomopilus dilepis*  
32 OSU079216 *Trametes trochilopa*  
32 KZW01389 *Xizkia glandulosa*  
32 KIF55835 *Trametes versicolor*  
32 SJL11930 *Armillaria ostoyae*  
32 PAV18085 *Pyrrhoderma noxium*  
32 RPD65635 *Lentinus tigrinus*  
32 PKR84861 *Phlebia subteritum*  
32 KLO18299 *Schizophora paradoxa*  
32 PPR08271 *Panaeolus cyaneusens*  
32 KIK53845 *Panaeolus luxurians*  
32 KIJ56431 *Sphaerobolus stellatus*  
32 EJD07843 *Fomitiporia mediterranea*  
32 PQ53992 *Gloeophyllum trabeum*  
32 KJ11288 *Phlebia subteritum*  
32 KIF62009 *Cyrtobasidium torrendii*  
32 KIJ69360 *Hydnocremulus pinastri*  
32 KJZ20455 *Neolentinus lepideus*  
32 EGN97531 *Serpula lacrymans var lacrymans*  
32 RQ060610 *Ptyrobasidium botryosum*  
32 KJ000704 *Panaeolus cyaneusens*  
32 EKM5139 *Phaeocheilium laevis*  
32 TBU45601 *Dichomitus aequalens*  
32 PSR82077 *Phlebia confertifuga*  
32 KIM89391 *Phlebia croceum*  
32 PIL31175 *Ganoderma sinense*  
32 KIJ70325 *Cyrtobasidium torrendii*  
32 RQ060610 *Ptyrobasidium botryosum*  
32 CEL62905 *Rhizoctonia solani*  
32 GAT57350 *Myceena chlorophoros*  
32 KIM25608 *Serendipita verifera*  
32 GAW02849 *Lentinula edodes*  
32 KDC63303 *Sclerocentrum ochraceum*  
32 KXP22319 *Fibularhizoctonia\_sp\_CBS\_109695*  
32 KJ17061 *Cylindrobasidium torrendii*  
32 KQ58058 *Jaspa argillacea*  
32 OCH93218 *Obba rivulosa*  
32 EMD36390 *Gliophoria subversipora*  
32 EIW87746 *Coniophora puteana*  
32 KII86244 *Plicaturopsis cripsa*  
32 KIM52025 *Plicaturopsis cripsa*  
32 KJF36083 *Sistotremastrum sueticum*  
32 KZS90559 *Sistotremastrum niveocremum*  
32 EF198134 *Schizophyllum commune*  
32 BBC62173 *Tricholoma matsutake*  
32 CCA69081 *Serendipita indica*  
32 EF198135 *Schizophyllum commune*  
32 KIS5613 *Plicaturopsis cripsa*  
32 RIN11730 *Punctularia strigosocanata*  
32 PIL33242 *Ganoderma sinense*  
32 KZT18190 *Neolentinus lepideus*  
32 KZV75308 *Peniophora\_sp\_CONT*  
32 KII86383 *Plicaturopsis cripsa*  
32 RQ080818 *Botryobasidium botryosum*  
32 KJ17061 *Cylindrobasidium torrendii*  
32 KZW01365 *Xizkia glandulosa*  
32 KQJ58178 *Jaspa argillacea*  
32 KZV75307 *Peniophora\_sp\_CONT*  
32 KIK51212 *Gyomopilus luxurians*  
32 RDX41931 *Polyporus brumalis*  
32 RIM29254 *Dichomitus aequalens*  
32 KIJ54802 *Fistulina hepatica*  
32 KIJ53725 *Fistulina hepatica*  
32 KIJ47132 *Fistulina hepatica*  
32 RPD55542 *Lentinus tigrinus*  
32 TCG61445 *Sclerocentrum ochraceum*  
32 KIM25608 *Serendipita verifera*  
32 KJF37603 *Auricularia subglabra*  
32 KJF54766 *Calocoria cornea*  
32 KIJ46805 *Fistulina hepatica*  
32 PQ066564 *Psilocybe cyaneusens*  
32 KZ039371 *Calocoria viscosa*  
32 KJ17061 *Cylindrobasidium torrendii*  
32 PV036877 *Serendipita verifera*  
32 RIM87674 *Stereum hirsutum*  
32 CCA69087 *Serendipita indica*  
32 CEL62035 *Rhizoctonia solani*  
32 RIM05398 *Punctularia strigosocanata*  
32 KJ002896 *Dacryopinax primgenitum*  
32 KJ033032 *Phlebia subteritum*  
32 CEL62036 *Rhizoctonia solani*  
32 KJ024533 *Tulasnella calospora*  
32 RIM84100 *Stereum hirsutum*  
32 KDN35973 *Rhizoctonia solani*  
32 KIJ48489 *Fistulina hepatica*  
32 KIJ48489 *Fistulina hepatica*  
32 KXP26813 *Fibularhizoctonia\_sp\_CBS\_109695*  
32 KQJ32475 *Pleurotus ostreatus*  
32 RIM84087 *Stereum hirsutum*  
32 KQJ32475 *Pleurotus ostreatus*  
32 QA088347 *Chaetomium globosum*  
32 OYR9754 *Leucosporidium creatinivorum*  
32 RIM34454 *Chaetomium globosum*  
32 OBT91518 *Pseudogymnoascus verrucosus*  
32 KEY73157 *Stachybotrys chartarum*  
32 OBT62577 *Pseudogymnoascus\_sp\_23242\_1\_I1*  
32 EON97874 *Phaeoacremonium minimum*  
32 KAT59198 *Chaetochlorophoros*  
32 GAG04271 *Paraphaeosphaeria spulosa*  
32 GAG029610 *Paraphaeosphaeria populina*  
32 GAG02993 *Melampsora larici-populina*  
32 RQV91411 *Puccinia trititica*  
32 EFF79788 *Puccinia graminis*  
32 KIJ51088 *Myceena chlorophoros*  
32 KNE94052 *Puccinia stiformis*  
32 RQV54553 *Puccinia sorgh*  
32 ACP40742 *Microrhizoctonia aurum*  
32 CAB06816 *Streptomyces lividans*  
32 ANA81565 *Pectonamycus ruminantur*

|       |                |   |      |          |                 |         |            |           |           |           |
|-------|----------------|---|------|----------|-----------------|---------|------------|-----------|-----------|-----------|
| LTLAG | -TCYVQNN       | - | T    | GVTVDSGR | TATLGA          | -       | TALAIYSGK  |           |           |           |
| SLPAG | -AYCDVQSG      | - | R    | SVTVDSGT | TATVAA          | -       | TALAIYTG   |           |           |           |
| SLPAG | -TCYDVVRA-AS   | - | SCDG | -D       | VTV-GDTEAQ      | -DA     | -KSVALRHGA |           |           |           |
| GLPFG | -AYCDVQSG      | - | R    | SVTVDSGT | TATVAA          | -       | TALAIHTGA  |           |           |           |
| SLPAG | -DYCDVQSG      | - | K    | GVTVDSGR | TATLGA          | -       | TAVAIHRGA  |           |           |           |
| SLPAG | -TCYVQNN       | - | K    | GVTVDSGR | TATLGA          | -       | TALAIYTG   |           |           |           |
| SLPAG | -TCYVAAASPD    | - | DCDG | -N       | VTV-GDDGAAQVTPA | -R      | -GALAIHTGA |           |           |           |
| SLPAG | -TCYDVQSN      | - | -    | T        | VTVDSAGR        | TALIPG  | -          | TALAIHNGR |           |           |
| SLPAG | -TCYDVQSN      | - | -    | T        | PVTNSSGG        | TATLAA  | -          | TAVAIHRNA |           |           |
| SLPAG | -TCYDVANGFTV   | - | -    | DGVCDPGS | -               | YQVSGG  | TATVPA     | -         | GAVAIHRVA |           |
| SLPFG | -VCYDVANGFTV   | - | -    | DGVCDPGS | -               | YQVSGG  | TATVPA     | -         | GAVAIHRVA |           |
| SLPAG | -TCYDVSGN      | - | -    | SGCTCSGS | -               | FVVS    | -GGVATVPA  | -         | SAIAIHTGS |           |
| SLPAG | -SKCYDVSGN     | - | -    | SGCTCSGS | -               | FVVS    | -GGVATVPA  | -         | SAIAIHTGS |           |
| SLPFG | -SYCDVSGN      | - | -    | SGCTGTG  | -               | FVTL    | -GGT       | TATVPA    | -         | GGIAIHTGA |
| SLPAG | -SYCDVSGT      | - | -    | SGACTGTG | -               | ITVS    | -GGT       | TANVPA    | -         | SAIAIHTGA |
| SLADG | -SYCDVSGN      | - | -    | DGACTGVG | -               | VTVS    | -SGV       | NANVPP    | -         | SAIAIHTGQ |
| SLPAG | -AYCDVSGS-A-N  | - | -    | AGTCSGSL | -               | ITVA    | -GGS       | SATVPA    | -         | SAIAIHTGA |
| SLPAG | -TCYDVSGS-A    | - | -    | SGSCTGSS | -               | FVVS    | -GGS       | SATVPA    | -         | SSIAIHTGQ |
| SLPAG | -SKCYDVSGS     | - | -    | SGACTGTG | -               | ITVS    | -GGT       | TANVPA    | -         | SAIAIHTGA |
| SLPFG | -SYCDVITGR     | - | -    | SGACTGTS | -               | VTVS    | -GGR       | SATVNA    | -         | DALAIHTG  |
| SLADG | -SYCDVITGR     | - | -    | SGSCTGTS | -               | MTVA    | -GGT       | TATVPA    | -         | SAIAIHTGS |
| SLADG | -SYCDVSGT      | - | -    | NGTCSGTS | -               | FVVS    | -GGS       | TATVPA    | -         | SAIAIHTGA |
| SLPAG | -TCYDVSGS      | - | -    | SGSCTGSS | -               | FVTS    | -GGT       | AATIGS    | -         | SAIAIHTGA |
| SLPAG | -TCYDVSGN      | - | -    | SGSCTGAA | -               | ITVS    | -GGS       | TATVPA    | -         | NAIAIHTGA |
| SLPFG | -TCYDVSGS      | - | -    | SGSCTGSS | -               | ITVS    | -GGT       | TATVPA    | -         | SAIAIHTGA |
| SLPFG | -TCYDVSGT      | - | -    | SGSCTGSS | -               | ITVS    | -GGT       | TATVPA    | -         | SAIAIHTGA |
| SLPAG | -TCYDVVAGK-P   | - | -    | GTTACAGA | -               | VTVS    | -GGT       | SATISG    | -         | NALAIYVGA |
| SLPFG | -TCYDVVSGT     | - | -    | GTTCTGSS | -               | VTVS    | -GGSL      | SATVPA    | -         | SAIAIHTGQ |
| SLADG | -SYCDVIGT      | - | -    | DDTCTGSG | -               | FVVS    | -GGS       | TATVPA    | -         | SAIAIHTGV |
| GLPEG | -EYCDVIAQAQO-T | - | -    | AGTRCGSG | -               | FNVS    | -GGT       | STTISA    | -         | NAVAIHGA  |
| SLPFG | -SYCDVSGS      | - | -    | SGSCTGSS | -               | FVVS    | -GGS       | SATVPA    | -         | SSIAIHTGA |
| SLPAG | -TCYDVSGS      | - | -    | SGSCTGSS | -               | FVVS    | -GGS       | TANVPA    | -         | GAVAIHRGA |
| SMPEG | -SYCDVSGSS     | - | -    | AGTCSGSL | -               | FVTS    | -GGT       | NANVPA    | -         | TALAIHTGA |
| SLPFG | -NYCDVHGT-A    | - | -    | GCTCSGTS | -               | VSVS    | -GGR       | TATVPA    | -         | NALIAHTSA |
| SLPAG | -SYCDVSGTS     | - | -    | SGKCTGTG | -               | ITVS    | -GGT       | TATVPA    | -         | SAIAIHTGA |
| SLPAG | -TCYDVVAGL-P   | - | -    | NAGCQGS  | -               | VTSSCGT | TATISA     | -         | NAIAIHGA  |           |
| GLPAG | -SYCDVAVGP-N   | - | -    | GAVCAGPS | -               | VTSSCGT | TPITISA    | -         | NAIAIHGA  |           |
| SLPAG | -TCYDVSGN      | - | -    | GVCSASA  | -               | VTASDGT | SATVNP     | -         | DALAIHTG  |           |
| SLPAG | -TCYDVSGN      | - | -    | GVCSASA  | -               | VTASDGT | SATVNP     | -         | DALAIHTG  |           |
| SLPAG | -TCYDVHGT-A    | - | -    | NGTCSGA  | -               | ITVS    | -GGS       | TATVPA    | -         | SAIAIHTGA |
| PLPAG | -TCYDVSGPPS-G  | - | -    | STCSGAS  | -               | VTASDGT | SATVLA     | -         | NAIAIHTGA |           |
| SLPAG | -AYCDVINGAA    | - | -    | NGTCSGTV | -               | VTASDGT | SATINA     | -         | DALAIHTGA |           |
| SLPAG | -SYCDVSGPPT-S  | - | -    | STCSGAS  | -               | VTASDGT | SATVAT     | -         | NAIAIHTGA |           |
| GLPFG | -SYCDVANGA-L   | - | -    | GSSTCGPS | -               | YTVT    | -GGSL      | VTVPA     | -         | SAIAIHTGA |
| SLPFG | -TCYDVSG       | - | -    | GSSTCGPS | -               | ITVS    | -GGS       | SATVPA    | -         | SAIAIHTGQ |
| SLPAG | -TCYDVSGIS     | - | -    | GSSTCGPS | -               | ITVS    | -GGS       | SATVPA    | -         | SAIAIHTGQ |
| SLPFG | -SYCDVSGSS     | - | -    | GSSTCGSS | -               | FVVS    | -GGS       | TATVPA    | -         | SAIAIHTGQ |
| SLPAG | -SYCDVSGTS     | - | -    | SGKCTGLT | -               | FVVS    | -GGT       | SATVPA    | -         | SAIAIHTGA |
| SPADG | -SYCDVSGNS-A   | - | -    | SGSCTGTS | -               | FVSV    | -NGSL      | TATVPA    | -         | SAIAIHTGA |
| SLPFG | -SYCDVHSGA     | - | -    | DGFTCSGS | -               | FVVS    | -GGS       | SATVPA    | -         | DSIAIHTGA |
| SLADG | -SYCDVITG-T    | - | -    | SGSCTGDS | -               | FVVS    | -GGS       | SATVPA    | -         | SAIAIHTGA |
| SLPAG | -TCYDVSGS      | - | -    | SGSCTGSS |                 |         |            |           |           |           |



**Figure S1.** Sequence alignment of all 268 collected sequences representing  $\alpha$ -amylases from subfamilies GH13\_1, GH13\_5, GH13\_15, GH13\_24, GH13\_32 and GH13\_42. The alignment spans the segment of sequences from the beginning of the strand  $\beta$ 1 (CSR-VIII) to the end of the strand  $\beta$ 8 (CSR-VII) of the catalytic TIM-barrel (including the domain B) completed by a part succeeding the strand  $\beta$ 8 (CSR-VII) since there are residues involved in SBSs. The CSRs are and catalytic triad are highlighted in yellow and red, respectively. The residues involved in chloride binding are signified by green; dark green is used for lysine replacing arginine in the CSR-VII. For SBS residues, blue highlighting is applied for residues conserved within a particular subfamily; outside subfamily, the corresponding residues are signified by cyan. The sequences are ordered from the top according to subfamilies starting with the subfamily GH13\_1. Within each subfamily, sequences within subfamilies (except for GH13\_15 and GH13\_24) are grouped as bacteria followed by fungi; each group being arranged alphabetically.

A

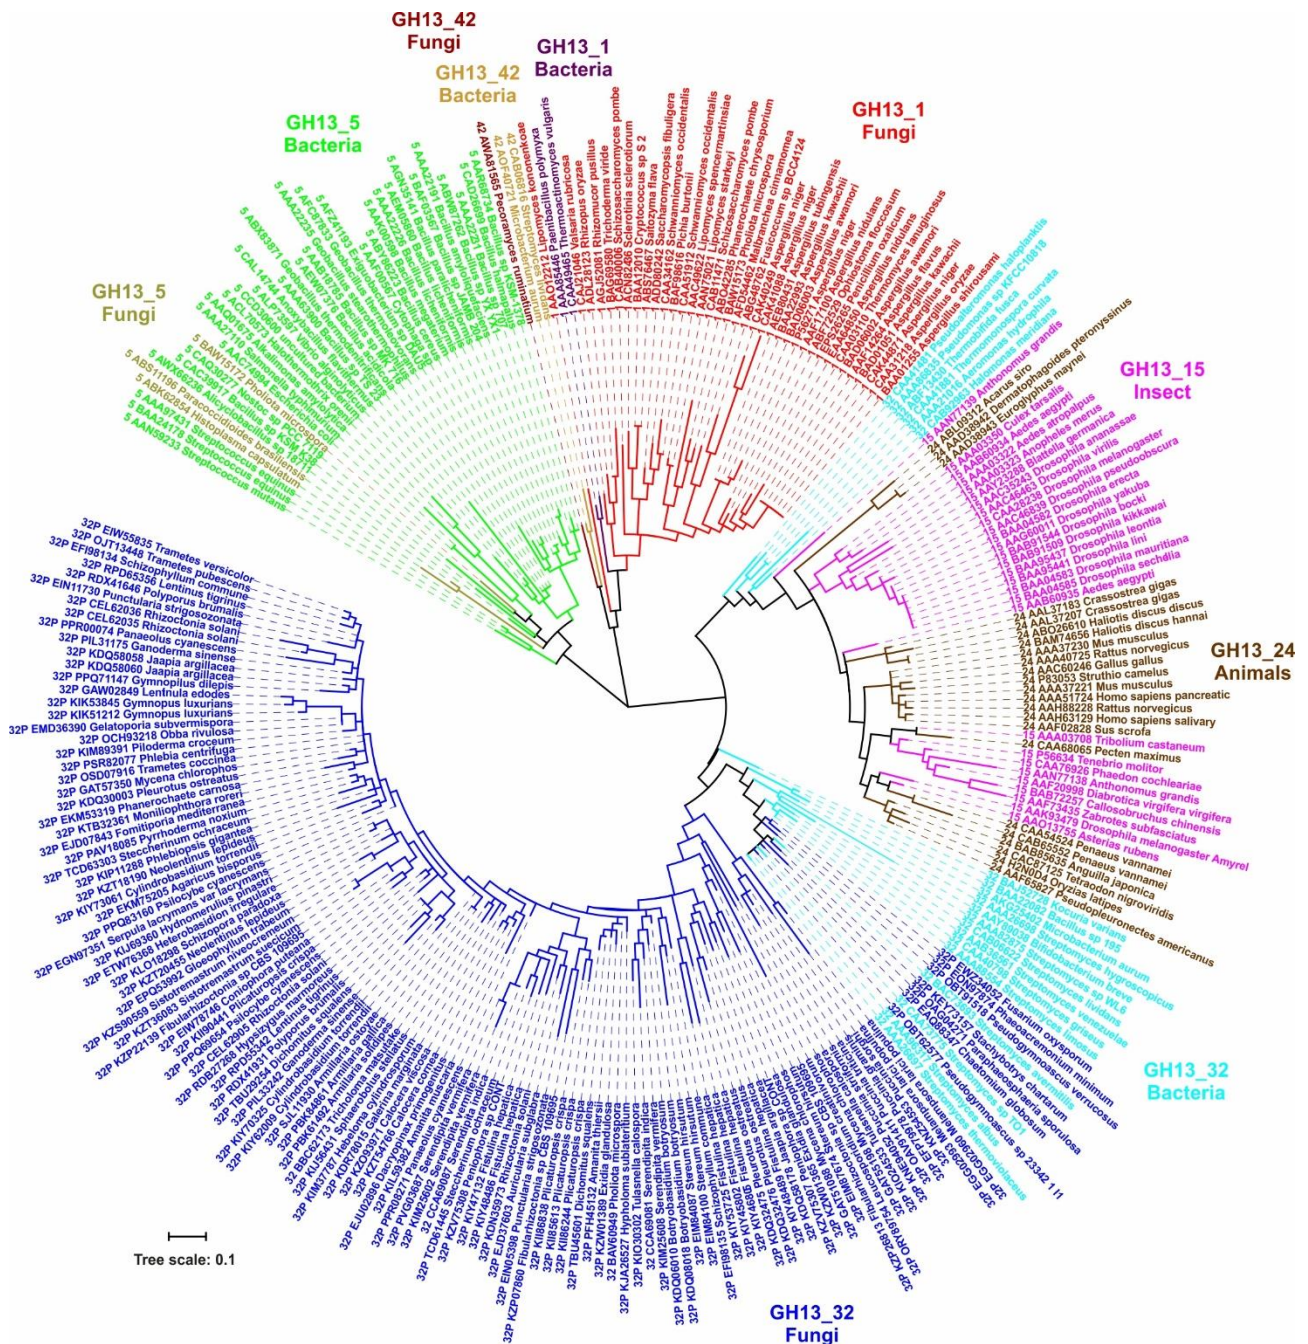



B

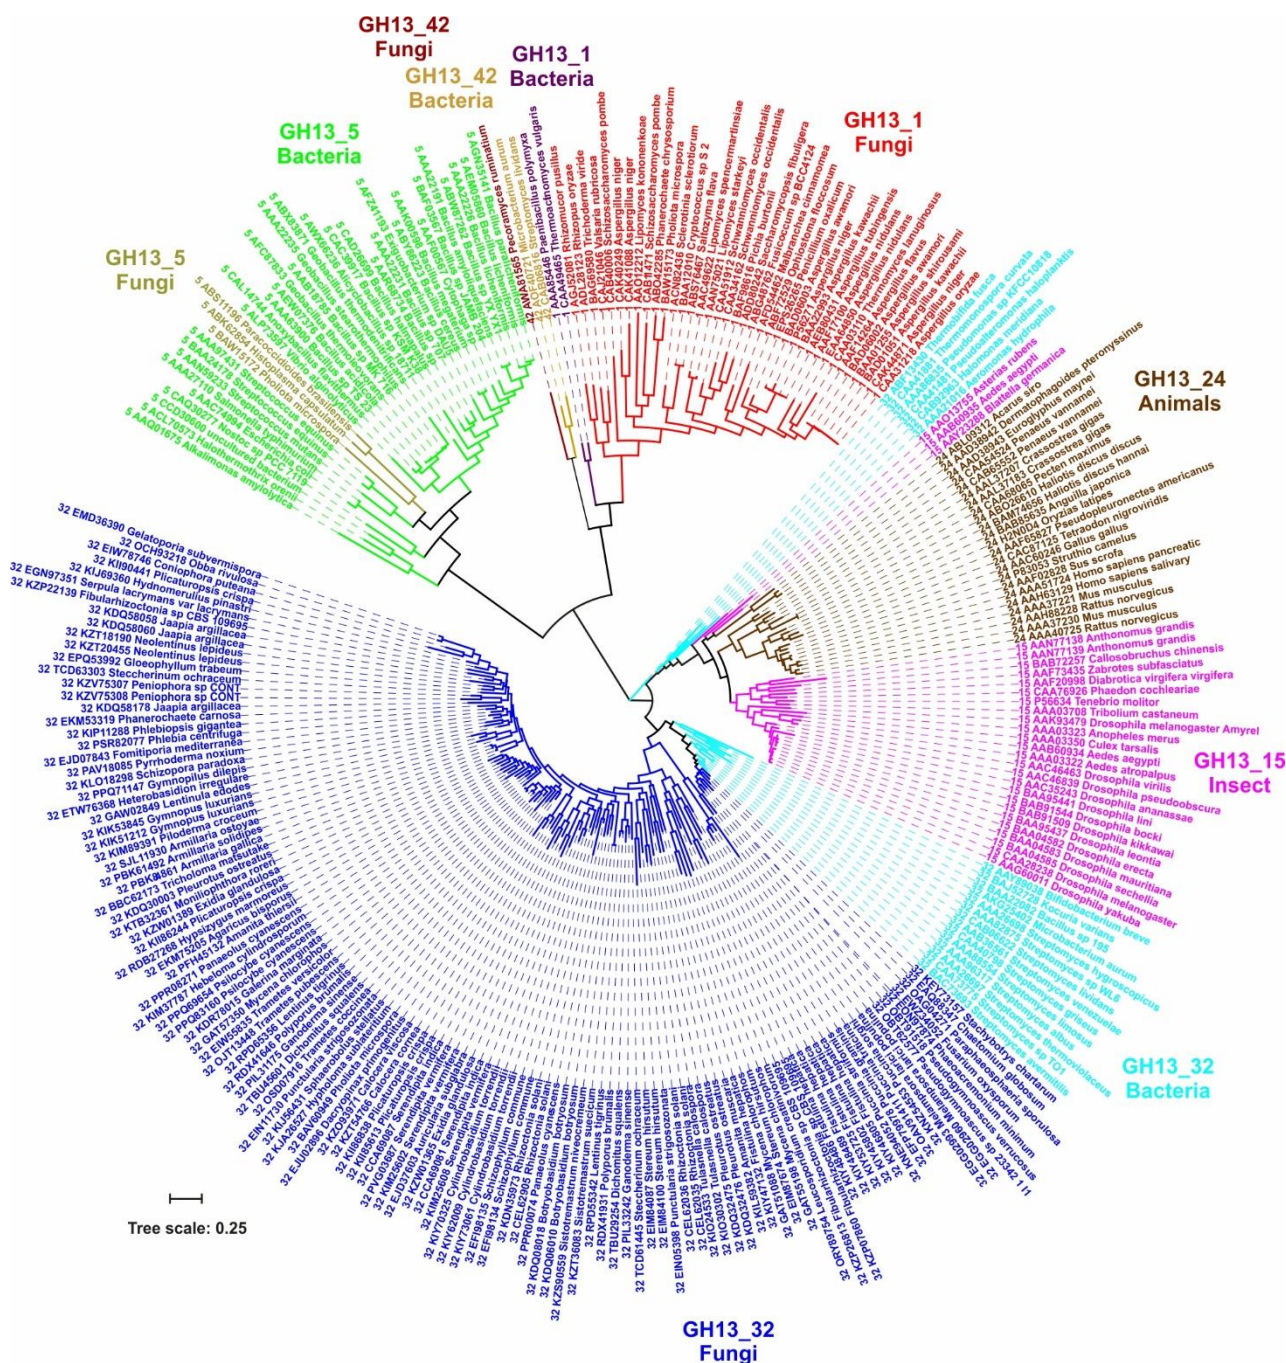

**Figure S2.** Evolutionary trees of studied  $\alpha$ -amylases based on the alignment of (A) sequences spanning the segment between the strands  $\beta$ 1 and  $\beta$ 8 of catalytic TIM-barrel; and (B) extracted eight conserved sequence regions. The same trees without all the leaves described are presented in Figure 2. Details concerning all  $\alpha$ -amylases compared in the trees as well as their colour codes are given in Table S1. Each protein is labelled by the GH13 subfamily number, the GenBank accession number (or rarely the UniProt accession number) and the name of the organism.

**Table S1.** List of 268 sequences from GH13 subfamilies containing fungal and chloride-dependent  $\alpha$ -amylases.<sup>a</sup>

| No.               | Source                        | GenBank <sup>b</sup> | UniProt <sup>c</sup> | Length <sup>d</sup> | $\beta$ 1- $\beta$ 8 <sup>e</sup> |
|-------------------|-------------------------------|----------------------|----------------------|---------------------|-----------------------------------|
| GH13_1 – Bacteria |                               |                      |                      |                     |                                   |
| 1                 | <i>Paenibacillus polymyxa</i> | AAA85446.1           | P21543               | 1196                | 753-1072                          |

|                          |                                    |            |                |     |         |
|--------------------------|------------------------------------|------------|----------------|-----|---------|
| 2                        | <i>Thermoactinomyces vulgaris</i>  | CAA49465.1 | Q60051         | 482 | 44-358  |
| GH13_1 – Eucarya – Fungi |                                    |            |                |     |         |
| 3                        | <i>Aspergillus awamori</i>         | BAD06003.1 | Q76L96         | 634 | 36-352  |
| 4                        | <i>Aspergillus awamori</i>         | BAD06002.1 | Q76L99         | 499 | 36-352  |
| 5                        | <i>Aspergillus flavus</i>          | AAF14264.1 | Q7LV45         | 499 | 36-352  |
| 6                        | <i>Aspergillus kawachii</i>        | BAD01051.1 | Q76CT3         | 498 | 35-351  |
| 7                        | <i>Aspergillus kawachii</i>        | BAA22993.1 | O13296         | 490 | 35-352  |
| 8                        | <i>Aspergillus nidulans</i>        | EAA64850.1 | A0A1U8QLT9     | 490 | 30-344  |
| 9                        | <i>Aspergillus nidulans</i>        | AAF17100.1 | Q9UV09         | 623 | 34-350  |
| 10                       | <i>Aspergillus niger</i>           | N.A.       | P56271         | 484 | 15-331  |
| 11                       | <i>Aspergillus niger</i>           | CAK44871.1 | A2QL05         | 498 | 35-351  |
| 12                       | <i>Aspergillus niger</i>           | CAK40249.1 | A2QTS4         | 555 | 40-359  |
| 13                       | <i>Aspergillus niger</i>           | CAK41088.1 | A2QYT9         | 549 | 43-362  |
| 14                       | <i>Aspergillus oryzae</i>          | CAA31218.1 | P0C1B3         | 499 | 36-352  |
| 15                       | <i>Aspergillus shirousami</i>      | BAA01255.1 | P30292         | 499 | 36-352  |
| 16                       | <i>Aspergillus tubingensis</i>     | AEB80431.1 | G9DA07         | 640 | 36-352  |
| 17                       | <i>Cryptococcus</i> sp. S-2        | BAA12010.1 | Q92394         | 631 | 35-366  |
| 18                       | <i>Fusicoccum</i> sp. BCC4124      | ABG48762.1 | Q0Z8K1         | 475 | 13-329  |
| 19                       | <i>Lipomyces kononenkoae</i>       | AAO12212.1 | Q8J1E4         | 499 | 38-356  |
| 20                       | <i>Lipomyces spencermartinsiae</i> | AAC49622.1 | Q01117         | 624 | 108-424 |
| 21                       | <i>Lipomyces starkeyi</i>          | AAN75021.1 | Q6YF33         | 647 | 185-501 |
| 22                       | <i>Malbranchea cinnamomea</i>      | AFD54462.1 | K9L8F3         | 492 | 36-350  |
| 23                       | <i>Ophiostoma floccosum</i>        | ABF72529.1 | Q06SN2         | 630 | 33-349  |
| 24                       | <i>Penicillium oxalicum</i>        | EPS26265.1 | S7Z6T2         | 626 | 32-348  |
| 25                       | <i>Phanerochaete chrysosporium</i> | ABO42285.1 | A5Y589         | 530 | 34-348  |
| 26                       | <i>Pholiota microspora</i>         | BAW15173.1 | A0A1L7MPN9     | 535 | 34-351  |
| 27                       | <i>Pichia burtonii</i>             | BAF98616.1 | A9ZPM0         | 494 | 45-358  |
| 28                       | <i>Rhizomucor pusillus</i>         | AGJ52081.1 | M9TI89         | 471 | 48-347  |
| 29                       | <i>Rhizopus oryzae</i>             | ADL28123.1 | E2G4G0         | 462 | 41-340  |
| 30                       | <i>Saccharomycopsis fibuligera</i> | ADD80242.1 | D4P4Y7         | 494 | 42-358  |
| 31                       | <i>Saitozyma flava</i>             | ABS76467.1 | A7LGW4         | 631 | 35-366  |
| 32                       | <i>Schizosaccharomyces pombe</i>   | CAB11471.1 | O14154         | 513 | 40-352  |
| 33                       | <i>Schizosaccharomyces pombe</i>   | CAB40006.1 | Q9Y7S9         | 564 | 36-356  |
| 34                       | <i>Schwanniomyces occidentalis</i> | CAA34162.1 | P19269         | 512 | 51-367  |
| 35                       | <i>Schwanniomyces occidentalis</i> | CAA51912.1 | Q08806         | 507 | 47-363  |
| 36                       | <i>Sclerotinia sclerotiorum</i>    | ACN82436.1 | C0LW29         | 499 | 36-349  |
| 37                       | <i>Thermomyces lanuginosus</i>     | CAA03110.1 | UPI000011D79A  | 493 | 33-350  |
| 38                       | <i>Trichoderma viride</i>          | BAG69580.1 | B5BQC3         | 463 | 35-334  |
| 39                       | <i>Valsaria rubricosa</i>          | CAJ21046.1 | UPI000057623F  | 493 | 35-332  |
| GH13_5 – Bacteria        |                                    |            |                |     |         |
| 40                       | <i>Alicyclobacillus</i> sp. 18711  | AWX66236.1 | A0A3P8MUS3     | 514 | 41-399  |
| 41                       | <i>Alkalimonas amyolytica</i>      | AAQ01675.1 | Q6WUB6         | 587 | 50-378  |
| 42                       | <i>Anoxybacillus flavithermus</i>  | CAL14744.1 | UPI0000DAC7C3  | 586 | 13-369  |
| 43                       | <i>Bacillus acidicola</i>          | AEW07376.1 | J9PQD2         | 479 | 9-365   |
| 44                       | <i>Bacillus amyloliquefaciens</i>  | AAA22191.1 | P00692         | 479 | 40-396  |
| 45                       | <i>Bacillus cereus</i>             | ABY86223.1 | B0LVG1         | 513 | 39-395  |
| 46                       | <i>Bacillus halmapalus</i>         | CAD26699.1 | UPI000002EA3C  | 485 | 13-370  |
| 47                       | <i>Bacillus licheniformis</i>      | AAA22226.1 | P06278         | 512 | 40-394  |
| 48                       | <i>Bacillus licheniformis</i>      | AEM05860.1 | I3P686         | 483 | 11-365  |
| 49                       | <i>Bacillus megaterium</i>         | AAK00598.1 | Q9AQ54         | 533 | 39-395  |
| 50                       | <i>Bacillus paralicheniformis</i>  | AGN35141.1 | UPI00002A8802F | 512 | 40-394  |
| 51                       | <i>Bacillus</i> sp. KSM-1378       | AAR68734.1 | O82839         | 516 | 44-401  |
| 52                       | <i>Bacillus</i> sp. 707            | AAA22231.1 | P19571         | 518 | 46-403  |
| 53                       | <i>Bacillus</i> sp. JAMB-204       | BAF03567.1 | Q0KKZ7         | 513 | 39-395  |
| 54                       | <i>Bacillus</i> sp. KSM-K38        | CAC39917.1 | Q93I48         | 501 | 32-386  |
| 55                       | <i>Bacillus</i> sp. MK 716         | AAB18785.1 | P71034         | 521 | 46-402  |
| 56                       | <i>Bacillus</i> sp. TS-23          | AAA63900.1 | Q59222         | 613 | 43-399  |
| 57                       | <i>Bacillus</i> sp. YX-1           | ABW87262.1 | A9YDD9         | 514 | 40-396  |
| 58                       | <i>Cytophaga</i> sp.               | AAF00567.1 | Q9RQT8         | 519 | 45-401  |

|    |                                        |            |            |     |         |
|----|----------------------------------------|------------|------------|-----|---------|
| 59 | <i>Escherichia coli</i>                | AAC74994.1 | P26612     | 495 | 10-369  |
| 60 | <i>Exiguobacterium</i> sp. DAU5        | AFZ41193.1 | M4I6P6     | 514 | 40-396  |
| 61 | <i>Geobacillus stearothermophilus</i>  | AAA22235.2 | P06279     | 549 | 46-402  |
| 62 | <i>Geobacillus thermodenitrificans</i> | ABX83871.1 | A9UJ60     | 549 | 46-402  |
| 63 | <i>Geobacillus thermoleovorans</i>     | AFC87833.1 | J9PXA2     | 549 | 46-402  |
| 64 | <i>Halotheothrix orenii</i>            | ACL70573.1 | B8CZ54     | 623 | 153-508 |
| 65 | <i>Nostoc</i> sp. PCC 7119             | CAQ30277.1 | B1VK33     | 489 | 9-366   |
| 66 | <i>Salmonella typhimurium</i>          | AAA27110.1 | P26613     | 494 | 10-369  |
| 67 | <i>Streptococcus equinus</i>           | BAA24178.1 | O50583     | 484 | 9-367   |
| 68 | <i>Streptococcus equinus</i>           | AAA97431.1 | Q53786     | 485 | 10-368  |
| 69 | <i>Streptococcus mutans</i>            | AAN59233.1 | Q8DT08     | 486 | 10-368  |
| 70 | uncultured bacterium                   | CCD30600.1 | I7I8P3     | 486 | 10-369  |
| 71 | <i>Vibrio alginolyticus</i>            | ALP73597.1 | A0A0S2UQL4 | 507 | 33-389  |

---

GH13\_5 – Eucarya – Fungi

---

|    |                                      |            |            |     |        |
|----|--------------------------------------|------------|------------|-----|--------|
| 72 | <i>Histoplasma capsulatum</i>        | ABK62854.1 | A0T074     | 540 | 42-399 |
| 73 | <i>Paracoccidioides brasiliensis</i> | ABS11196.1 | A7L832     | 535 | 42-397 |
| 74 | <i>Pholiota microspora</i>           | BAW15172.1 | A0A1L7MPN7 | 519 | 40-399 |

---

GH13\_15 – Eucarya

---

|     |                                       |            |        |     |         |
|-----|---------------------------------------|------------|--------|-----|---------|
| 75  | <i>Aedes aegypti</i>                  | AAB60935.1 | P53354 | 737 | 275-594 |
| 76  | <i>Aedes aegypti</i>                  | AAB60934.1 | O02652 | 486 | 35-345  |
| 77  | <i>Aedes atropalpus</i>               | AAA03322.1 | Q16924 | 491 | 35-345  |
| 78  | <i>Anopheles merus</i>                | AAA03323.1 | Q17059 | 514 | 39-356  |
| 79  | <i>Anthonomus grandis</i>             | AAN77138.1 | Q8I9K6 | 484 | 34-341  |
| 80  | <i>Anthonomus grandis</i>             | AAN77139.1 | Q8I9K5 | 491 | 35-348  |
| 81  | <i>Asterias rubens</i>                | AAO13755.1 | Q8IA45 | 492 | 34-345  |
| 82  | <i>Blattella germanica</i>            | AAZ23288.1 | Q2KJQ1 | 498 | 35-351  |
| 83  | <i>Callosobruchus chinensis</i>       | BAB72257.1 | Q5KTR5 | 489 | 33-344  |
| 84  | <i>Culex tarsalis</i>                 | AAA03350.1 | Q23767 | 496 | 34-350  |
| 85  | <i>Diabrotica virgifera virgifera</i> | AAF20998.1 | Q9U406 | 482 | 37-343  |
| 86  | <i>Drosophila ananassae</i>           | AAC35243.1 | O77407 | 494 | 35-348  |
| 87  | <i>Drosophila bocki</i>               | BAB91544.1 | Q9NKZ2 | 494 | 35-348  |
| 88  | <i>Drosophila erecta</i>              | BAA04582.1 | Q23932 | 494 | 35-348  |
| 89  | <i>Drosophila kikkawai</i>            | BAB91509.1 | Q8MM52 | 494 | 35-348  |
| 90  | <i>Drosophila leontia</i>             | BAA95437.1 | Q9NKY9 | 494 | 35-348  |
| 91  | <i>Drosophila lini</i>                | BAA95441.1 | Q9N6Q7 | 494 | 35-348  |
| 92  | <i>Drosophila mauritiana</i>          | BAA04583.1 | P54215 | 494 | 35-348  |
| 93  | <i>Drosophila melanogaster</i> Amyrel | AAK93479.1 | O18408 | 493 | 36-347  |
| 94  | <i>Drosophila melanogaster</i>        | CAA28238.1 | P08144 | 494 | 35-348  |
| 95  | <i>Drosophila pseudoobscura</i>       | AAC46839.1 | O46116 | 494 | 35-348  |
| 96  | <i>Drosophila sechellia</i>           | BAA04585.1 | Q24642 | 494 | 35-348  |
| 97  | <i>Drosophila virilis</i>             | AAC46463.1 | Q24737 | 494 | 35-348  |
| 98  | <i>Drosophila yakuba</i>              | AAG60011.1 | P51548 | 494 | 35-348  |
| 99  | <i>Phaedon cochleariae</i>            | CAA76926.1 | O97396 | 485 | 35-344  |
| 100 | <i>Tenebrio molitor</i>               | N.A.       | P56634 | 471 | 17-326  |
| 101 | <i>Tribolium castaneum</i>            | AAA03708.1 | Q26854 | 490 | 34-345  |
| 102 | <i>Zabrotes subfasciatus</i>          | AAF73435.1 | Q9N2P9 | 483 | 34-344  |

---

GH13\_24 – Eucarya

---

|     |                                       |            |        |     |        |
|-----|---------------------------------------|------------|--------|-----|--------|
| 103 | <i>Acarus siro</i>                    | ABL09312.1 | B0KZK1 | 517 | 41-360 |
| 104 | <i>Anguilla japonica</i>              | BAB85635.1 | Q8QGW2 | 512 | 32-357 |
| 105 | <i>Crassostrea gigas</i>              | AAL37207.1 | Q8WSG9 | 519 | 36-356 |
| 106 | <i>Crassostrea gigas</i>              | AAL37183.1 | Q8WSH2 | 520 | 36-357 |
| 107 | <i>Dermatophagoides pteronyssinus</i> | AAD38942.1 | P49274 | 496 | 18-337 |
| 108 | <i>Euroglyphus maynei</i>             | AAD38943.1 | Q9Y196 | 521 | 43-362 |
| 109 | <i>Gallus gallus</i>                  | AAC60246.1 | Q98942 | 512 | 32-357 |
| 110 | <i>Haliotis discus discus</i>         | ABO26610.1 | B6RB08 | 511 | 35-356 |
| 111 | <i>Haliotis discus hannai</i>         | BAM74656.1 | L8AW48 | 511 | 35-356 |



|     |                                      |            |        |     |        |
|-----|--------------------------------------|------------|--------|-----|--------|
| 112 | <i>Homo sapiens</i> – pancreas       | AAA51724.1 | P04746 | 511 | 32-357 |
| 113 | <i>Homo sapiens</i> – saliva         | AAH63129.1 | P04745 | 511 | 32-357 |
| 114 | <i>Mus musculus</i>                  | AAA37221.1 | P00687 | 511 | 32-357 |
| 115 | <i>Mus musculus</i> – pancreas       | AAA37230.1 | P00688 | 508 | 32-354 |
| 116 | <i>Oryzias latipes</i>               | N.A.       | H2N0D4 | 512 | 32-357 |
| 117 | <i>Pecten maximus</i>                | CAA68065.1 | P91778 | 508 | 35-354 |
| 118 | <i>Penaeus vannamei</i>              | CAA54524.1 | Q26193 | 512 | 33-357 |
| 119 | <i>Penaeus vannamei</i>              | CAB65552.2 | Q9U0F9 | 489 | 33-357 |
| 120 | <i>Pseudopleuronectes americanus</i> | AAF65827.1 | Q9I9H6 | 512 | 32-357 |
| 121 | <i>Rattus norvegicus</i> – pancreas  | AAA40725.1 | P00689 | 508 | 32-354 |
| 122 | <i>Rattus norvegicus</i>             | AAH88228.1 | Q5I0L0 | 511 | 32-357 |
| 123 | <i>Struthio camelus</i>              | N.A.       | P83053 | 497 | 17-342 |
| 124 | <i>Sus scrofa</i> – pancreas         | AAF02828.1 | P00690 | 511 | 32-357 |
| 125 | <i>Tetraodon nigroviridis</i>        | CAC87125.1 | Q8UWE5 | 513 | 32-358 |

#### GH13\_32 – Bacteria

|     |                                       |             |            |      |        |
|-----|---------------------------------------|-------------|------------|------|--------|
| 126 | <i>Aeromonas hydrophila</i>           | AAA21016.1  | P41131     | 443  | 32-328 |
| 127 | <i>Bacillus</i> sp. 195               | BAA22082.1  | O24781     | 700  | 59-357 |
| 128 | <i>Bifidobacterium breve</i>          | AAAY89038.1 | F9Y041     | 1708 | 58-364 |
| 129 | <i>Halomonas meridiana</i>            | CAB92963.1  | Q9L4I9     | 457  | 27-326 |
| 130 | <i>Kocuria varians</i>                | BAJ52728.1  | E5RKQ5     | 736  | 93-391 |
| 131 | <i>Microbacterium aurum</i>           | AKG25402.1  | A0A0G2T4B5 | 1417 | 64-367 |
| 132 | <i>Pseudoalteromonas haloplanktis</i> | CAA41481.1  | P29957     | 669  | 33-329 |
| 133 | <i>Pseudomonas</i> sp. KFCC10818      | AAA86835.1  | Q52413     | 563  | 37-320 |
| 134 | <i>Streptomyces albus</i>             | AAA96317.1  | Q53633     | 460  | 42-334 |
| 135 | <i>Streptomyces avermitilis</i>       | BAC73693.1  | Q82AS5     | 460  | 42-334 |
| 136 | <i>Streptomyces griseus</i>           | CAA40798.1  | P30270     | 566  | 41-333 |
| 137 | <i>Streptomyces hygroscopicus</i>     | AAA26698.1  | P08486     | 478  | 43-329 |
| 138 | <i>Streptomyces limosus</i>           | AAA88554.1  | P09794     | 566  | 41-333 |
| 139 | <i>Streptomyces lividans</i>          | CAB06622.1  | P97179     | 573  | 48-340 |
| 140 | <i>Streptomyces</i> sp. TO1           | CAA73775.1  | O65947     | 453  | 37-328 |
| 141 | <i>Streptomyces</i> sp. WL6           | AAA82875.1  | Q59964     | 459  | 44-333 |
| 142 | <i>Streptomyces thermoviolaceus</i>   | AAA26697.1  | P27350     | 460  | 42-334 |
| 143 | <i>Streptomyces venezuelae</i>        | AAB36561.1  | P22998     | 569  | 41-333 |
| 144 | <i>Thermobifida fusca</i>             | ABF13430.1  | Q1KLC8     | 605  | 46-350 |
| 145 | <i>Thermomonospora curvata</i>        | CAA41881.1  | P29750     | 605  | 46-350 |

#### GH13\_32 – Eucarya – Fungi

|     |                                  |            |            |      |         |
|-----|----------------------------------|------------|------------|------|---------|
| 146 | <i>Pholiota microspora</i>       | BAV60949.1 | A0A1E1ERR9 | 589  | 51-347  |
| 147 | <i>Hypholoma sublateritium</i>   | KJA26527.1 | A0A0D2LFX5 | 591  | 47-343  |
| 148 | <i>Galerina marginata</i>        | KDR78015.1 | A0A067T4C3 | 589  | 48-344  |
| 149 | <i>Psilocybe cyanescens</i>      | PPQ83160.1 | A0A409WXA0 | 586  | 47-341  |
| 150 | <i>Moniliophthora roreri</i>     | KTB32361.1 | A0A0W0F7R2 | 585  | 44-340  |
| 151 | <i>Pleurotus ostreatus</i>       | KDQ30003.1 | A0A067NPJ8 | 587  | 47-343  |
| 152 | <i>Polyporus brumalis</i>        | RDX41646.1 | A0A371CMZ2 | 584  | 48-344  |
| 153 | <i>Trametes pubescens</i>        | OJT13448.1 | A0A1M2W0S7 | 597  | 52-348  |
| 154 | <i>Amanita thiersii</i>          | PFH45132.1 | A0A2A9NBQ2 | 588  | 52-349  |
| 155 | <i>Hebeloma cylindrosporum</i>   | KIM37787.1 | A0A0C2Y9T3 | 580  | 44-340  |
| 156 | <i>Armillaria solidipes</i>      | PBK61492.1 | A0A2H3B359 | 573  | 36-330  |
| 157 | <i>Heterobasidion irregulare</i> | ETW76368.1 | W4JS51     | 545  | 2-298   |
| 158 | <i>Hypsizygus marmoreus</i>      | RDB27268.1 | A0A369JZU5 | 587  | 48-344  |
| 159 | <i>Gymnopilus dilepis</i>        | PPQ71147.1 | A0A409VY19 | 654  | 108-404 |
| 160 | <i>Trametes coccinea</i>         | OSD07916.1 | A0A1Y2J3F4 | 577  | 50-334  |
| 161 | <i>Exidia glandulosa</i>         | KZW01389.1 | A0A165NYB6 | 595  | 53-348  |
| 162 | <i>Trametes versicolor</i>       | EIW55835.1 | N.A.       | 598  | 52-348  |
| 163 | <i>Armillaria ostoyae</i>        | SJL11930.1 | A0A284RT72 | 591  | 36-348  |
| 164 | <i>Pyrrhoderma noxium</i>        | PAV18085.1 | A0A286UF06 | 1482 | 426-722 |
| 165 | <i>Lentinus tigrinus</i>         | RPD65356.1 | A0A5C2SVV8 | 593  | 51-347  |
| 166 | <i>Armillaria gallica</i>        | PBK84861.1 | A0A2H3CP67 | 565  | 36-324  |
| 167 | <i>Schizopora paradoxa</i>       | KLO18298.1 | A0A0H2S996 | 582  | 42-341  |
| 168 | <i>Panaeolus cyanescens</i>      | PPR08271.1 | A0A409YZ37 | 590  | 43-341  |

|     |                                         |            |               |     |         |
|-----|-----------------------------------------|------------|---------------|-----|---------|
| 169 | <i>Gymnopus luxurians</i>               | KIK53845.1 | A0A0D0ATN4    | 598 | 54-341  |
| 170 | <i>Sphaerobolus stellatus</i>           | KIJ56431.1 | N.A.          | 542 | 9-307   |
| 171 | <i>Fomitiporia mediterranea</i>         | EJD07843.1 | N.A.          | 646 | 105-398 |
| 172 | <i>Gloeophyllum trabeum</i>             | EPQ53992.1 | S7Q3A2        | 569 | 34-330  |
| 173 | <i>Phlebiopsis gigantea</i>             | KIP11288.1 | A0A0C3PUH0    | 577 | 44-340  |
| 174 | <i>Cylindrobasidium torrendii</i>       | KIY62009.1 | A0A0D7AVY0    | 589 | 35-333  |
| 175 | <i>Hydnomerulius pinastri</i>           | KIJ69360.1 | N.A.          | 568 | 35-332  |
| 176 | <i>Neolentinus lepideus</i>             | KZT20455.1 | A0A165P365    | 574 | 39-335  |
| 177 | <i>Serpula lacrymans</i>                | EGN97351.1 | F8Q2E0        | 585 | 46-349  |
| 178 | <i>Botryobasidium botryosum</i>         | KDQ06010.1 | A0A067LUS3    | 588 | 46-342  |
| 179 | <i>Panaeolus cyanescens</i>             | PPR00074.1 | A0A409YAP2    | 590 | 46-341  |
| 180 | <i>Phanerochaete carnosa</i>            | EKM53319.1 | K5W345        | 577 | 43-340  |
| 181 | <i>Dichomitus squalens</i>              | TBU45601.1 | A0A4Q9NZH8    | 572 | 51-347  |
| 182 | <i>Phlebia centrifuga</i>               | PSR82077.1 | A0A2R6P097    | 555 | 46-312  |
| 183 | <i>Piloderma croceum</i>                | KIM89391.1 | A0A0C3GFG2    | 598 | 58-359  |
| 184 | <i>Ganoderma sinense</i>                | PIL31175.1 | A0A2G8SBN2    | 555 | 50-346  |
| 185 | <i>Cylindrobasidium torrendii</i>       | KIY70325.1 | A0A0D7BJC3    | 579 | 36-334  |
| 186 | <i>Jaapia argillacea</i>                | KDQ58060.1 | A0A067PW10    | 650 | 115-411 |
| 187 | <i>Rhizoctonia solani</i>               | CEL62905.1 | A0A0B7FYW5    | 975 | 38-333  |
| 188 | <i>Mycena chlorophos</i>                | GAT57350.1 | A0A146IBV9    | 748 | 143-439 |
| 189 | <i>Serendipita vermifera</i>            | KIM25608.1 | A0A0C2WGV7    | 593 | 40-336  |
| 190 | <i>Lentinula edodes</i>                 | GAW02849.1 | A0A1Q3E749    | 669 | 60-357  |
| 191 | <i>Steccherinum ochraceum</i>           | TCD63303.1 | A0A4R0R9L4    | 551 | 13-312  |
| 192 | <i>Fibularhizoctonia</i> sp. CBS 109695 | KZP22139.1 | A0A166KQ11    | 580 | 42-340  |
| 193 | <i>Plicaturopsis crispa</i>             | KII90441.1 | N.A.          | 584 | 45-347  |
| 194 | <i>Jaapia argillacea</i>                | KDQ58058.1 | A0A067PTB3    | 573 | 22-333  |
| 195 | <i>Obba rivulosa</i>                    | OCH93218.1 | UPI000DC9AC67 | 571 | 41-334  |
| 196 | <i>Gelatoporia subvermispora</i>        | EMD36390.1 | M2QWA3        | 569 | 40-332  |
| 197 | <i>Coniophora puteana</i>               | EIW78746.1 | A0A5M3MIB8    | 569 | 32-327  |
| 198 | <i>Plicaturopsis crispa</i>             | KII86244.1 | N.A.          | 501 | 43-365  |
| 199 | <i>Agaricus bisporus</i>                | EKM75205.1 | K5XL16        | 474 | 42-338  |
| 200 | <i>Sistotremastrum suecicum</i>         | KZT36083.1 | A0A166B801    | 589 | 45-348  |
| 201 | <i>Sistotremastrum niveocreteum</i>     | KZS90559.1 | A0A164RHE5    | 589 | 45-348  |
| 202 | <i>Schizophyllum commune</i>            | EFI98134.1 | D8Q2K0        | 470 | 38-334  |
| 203 | <i>Tricholoma matsutake</i>             | BBC62173.1 | A0A2Z5Y5L0    | 491 | 62-358  |
| 204 | <i>Serendipita indica</i>               | CCA69081.1 | G4TCP2        | 570 | 24-316  |
| 205 | <i>Schizophyllum commune</i>            | EFI98135.1 | D8Q2K1        | 482 | 49-345  |
| 206 | <i>Plicaturopsis crispa</i>             | KII85613.1 | N.A.          | 782 | 58-355  |
| 207 | <i>Punctularia strigosozonata</i>       | EIN11730.1 | N.A.          | 477 | 44-341  |
| 208 | <i>Ganoderma sinense</i>                | PIL33242.1 | A0A2G8SHK1    | 483 | 48-342  |
| 209 | <i>Neolentinus lepideus</i>             | KZT18190.1 | A0A165MD72    | 510 | 42-338  |
| 210 | <i>Peniophora</i> sp. CONT              | KZV75308.1 | A0A166K504    | 485 | 57-351  |
| 211 | <i>Plicaturopsis crispa</i>             | KII86838.1 | N.A.          | 509 | 33-330  |
| 212 | <i>Botryobasidium botryosum</i>         | KDQ08018.1 | A0A067LXA2    | 483 | 47-345  |
| 213 | <i>Cylindrobasidium torrendii</i>       | KIY73061.1 | A0A0D7BTW3    | 469 | 37-333  |
| 214 | <i>Exidia glandulosa</i>                | KZW01365.1 | A0A165NXQ6    | 594 | 29-327  |
| 215 | <i>Jaapia argillacea</i>                | KDQ58178.1 | A0A067PTN6    | 729 | 160-457 |
| 216 | <i>Peniophora</i> sp. CONT              | KZV75307.1 | A0A166K4Z3    | 474 | 45-341  |
| 217 | <i>Gymnopus luxurians</i>               | KIK51212.1 | A0A0D0C0R2    | 475 | 43-340  |
| 218 | <i>Polyporus brumalis</i>               | RDX41931.1 | A0A371CNS9    | 429 | 2-295   |
| 219 | <i>Dichomitus squalens</i>              | TBU29254.1 | A0A4Q9MNH0    | 436 | 2-298   |
| 220 | <i>Fistulina hepatica</i>               | KIY45802.1 | A0A0D7A480    | 566 | 30-329  |
| 221 | <i>Amanita muscaria</i>                 | KIL59382.1 | A0A0C2WDE5    | 515 | 46-344  |
| 222 | <i>Fistulina hepatica</i>               | KIY53725.1 | A0A0D7APG0    | 558 | 8-315   |
| 223 | <i>Fistulina hepatica</i>               | KIY47132.1 | A0A0D7A7Y2    | 549 | 10-308  |
| 224 | <i>Lentinus tigrinus</i>                | RPD55342.1 | A0A5C2RUP1    | 429 | 2-295   |
| 225 | <i>Steccherinum ochraceum</i>           | TCD61445.1 | A0A4R0R8J3    | 477 | 51-349  |
| 226 | <i>Serendipita vermifera</i>            | KIM25602.1 | A0A0C2X8T3    | 514 | 45-341  |
| 227 | <i>Auricularia subglabra</i>            | EJD37603.1 | J0WW10        | 567 | 2-304   |
| 228 | <i>Calocera cornea</i>                  | KZT54766.1 | A0A165EFL8    | 539 | 69-364  |
| 229 | <i>Fistulina hepatica</i>               | KIY46805.1 | A0A0D7A7V0    | 479 | 40-338  |
| 230 | <i>Psilocybe cyanescens</i>             | PPQ69654.1 | A0A409VTS4    | 367 | 47-343  |
| 231 | <i>Calocera viscosa</i>                 | KZO93971.1 | A0A167JVZ9    | 472 | 2-297   |

|     |                                         |            |               |      |         |
|-----|-----------------------------------------|------------|---------------|------|---------|
| 232 | <i>Fibularhizoctonia</i> sp. CBS 109695 | KZP07860.1 | A0A165WS59    | 590  | 45-352  |
| 233 | <i>Serendipita vermifera</i>            | PVG03687.1 | N.A.          | 536  | 46-362  |
| 234 | <i>Stereum hirsutum</i>                 | EIM87674.1 | N.A.          | 600  | 41-343  |
| 235 | <i>Serendipita indica</i>               | CCA69087.1 | G4TCP6        | 486  | 2-298   |
| 236 | <i>Rhizoctonia solani</i>               | CEL62035.1 | A0A0B7FWG9    | 479  | 48-343  |
| 237 | <i>Punctularia strigosozonata</i>       | EIN05398.1 | N.A.          | 442  | 12-307  |
| 238 | <i>Dacryopinax primogenitus</i>         | EJU02896.1 | M5FXX0        | 522  | 42-341  |
| 239 | <i>Tulasnella calospora</i>             | KIO30302.1 | A0A0C3M9C4    | 444  | 2-298   |
| 240 | <i>Rhizoctonia solani</i>               | CEL62036.1 | A0A0B7FVR4    | 477  | 48-341  |
| 241 | <i>Tulasnella calospora</i>             | KIO24533.1 | A0A0C3KSS6    | 476  | 44-338  |
| 242 | <i>Stereum hirsutum</i>                 | EIM84100.1 | N.A.          | 475  | 44-339  |
| 243 | <i>Rhizoctonia solani</i>               | KDN35973.1 | A0A066V6S6    | 451  | 2-297   |
| 244 | <i>Fistulina hepatica</i>               | KIY48489.1 | A0A0D7ADK8    | 447  | 16-311  |
| 245 | <i>Fistulina hepatica</i>               | KIY48486.1 | A0A0D7AF22    | 459  | 27-322  |
| 246 | <i>Fibularhizoctonia</i> sp. CBS 109695 | KZP26813.1 | A0A166Q6M7    | 430  | 2-291   |
| 247 | <i>Pleurotus ostreatus</i>              | KDQ32476.1 | A0A067P9A6    | 466  | 50-352  |
| 248 | <i>Stereum hirsutum</i>                 | EIM84087.1 | N.A.          | 477  | 45-341  |
| 249 | <i>Pleurotus ostreatus</i>              | KDQ32475.1 | A0A067NZR1    | 458  | 38-342  |
| 250 | <i>Chaetomium globosum</i>              | EAQ88347.1 | Q2GZT0        | 458  | 40-332  |
| 251 | <i>Leucosporidium creatinivorum</i>     | ORY89754.1 | A0A1Y2G021    | 594  | 45-339  |
| 252 | <i>Fusarium oxysporum</i>               | EWZ34052.1 | W9JPP9        | 456  | 38-330  |
| 253 | <i>Pseudogymnoascus verrucosus</i>      | OBT91518.1 | A0A1B8G6R5    | 459  | 41-333  |
| 254 | <i>Stachybotrys chartarum</i>           | KEY73157.1 | A0A084B6H8    | 458  | 40-342  |
| 255 | <i>Pseudogymnoascus</i> sp. 23342-1-I1  | OBT62577.1 | A0A1B8DUF8    | 459  | 41-333  |
| 256 | <i>Phaeoacremonium minimum</i>          | EON97874.1 | R8BEZ8        | 461  | 43-335  |
| 257 | <i>Mycena chlorophos</i>                | GAT55198.1 | A0A146I682    | 846  | 405-708 |
| 258 | <i>Paraphaeosphaeria sporulosa</i>      | OAG04271.1 | A0A177CAS9    | 458  | 40-332  |
| 259 | <i>Melampsora larici populina</i>       | EGG02960.1 | F4RXF9        | 500  | 72-375  |
| 260 | <i>Melampsora larici populina</i>       | EGG02993.1 | F4RXG2        | 462  | 34-337  |
| 261 | <i>Puccinia triticina</i>               | OAV91411.1 | A0A180GFL8    | 516  | 77-380  |
| 262 | <i>Puccinia graminis</i>                | EFP79978.1 | UPI000251D20C | 574  | 85-388  |
| 263 | <i>Mycena chlorophos</i>                | GAT51088.1 | A0A146HU33    | 1085 | 44-377  |
| 264 | <i>Puccinia striiformis</i>             | KNE94052.1 | A0A0L0V451    | 535  | 102-397 |
| 265 | <i>Puccinia sorghi</i>                  | KNZ54553.1 | A0A0L6V192    | 666  | 109-477 |

#### GH13\_42 – Bacteria

|     |                              |            |            |      |          |
|-----|------------------------------|------------|------------|------|----------|
| 266 | <i>Microbacterium aurum</i>  | AOF40721.1 | A0A1B3IKE0 | 1278 | 658-1112 |
| 267 | <i>Streptomyces lividans</i> | CAB06816.1 | P96992     | 993  | 369-827  |

#### GH13\_42 – Eucarya – Fungi

|     |                               |            |            |     |         |
|-----|-------------------------------|------------|------------|-----|---------|
| 268 | <i>Pecoramyces ruminatium</i> | AWA81565.1 | A0A2S0S3D2 | 975 | 379-805 |
|-----|-------------------------------|------------|------------|-----|---------|

<sup>a</sup> Colour code: GH13\_1: plum – bacteria, red – fungi; GH13\_5: green – bacteria, olive – fungi; GH13\_15: magenta – eukaryotes; GH13\_24: walnut – eukaryotes; GH13\_32: cyan – bacteria, blue – fungi; GH13\_42: gold – Bacteria, ruby red – fungi. Sequences No. 146-265 of fungal  $\alpha$ -amylases from the subfamily GH13\_32 were collected based on the CAZy database and BLAST search using the sequence of *Pholiota microspora*  $\alpha$ -amylase as a query.

<sup>b</sup> GenBank accession No.

<sup>c</sup> UniProt accession No.

<sup>d</sup> Length of the protein in amino acid residues.

<sup>e</sup> Segment of the protein from the strand  $\beta$ 1 to the end of the strand  $\beta$ 8 of the catalytic TIM-barrel including domain B.
